# Supplementary material
Source: PubMed Central journal article supplement (PMC4784800)
Supplement: sour025275.ww1_default.pdf [file sour025275.ww1_default.pdf]

**Appendix 1:**

Search Strategies and Data Extraction Form

## Search Strategy

### a) Saturated Fat

**Database: EBM Reviews - Cochrane Central Register of Controlled Trials <June 2013>, EBM Reviews - Cochrane Database of Systematic Reviews <2005 to May 2013>, EBM Reviews - Database of Abstracts of Reviews of Effects <2nd Quarter 2013>**

#### Search Strategy:

- 
- 1 Fatty Acids/ (1129)
  - 2 fatty acid\*.tw. (6220)
  - 3 Dietary Fats/ (2629)
  - 4 (saturated adj2 fat\*).tw. (1201)
  - 5 Butyric Acid/ (11)
  - 6 ((butyric or butanoic) adj acid\*).tw. (94)
  - 7 ((caproic or hexanoic) adj acid\*).tw. (15)
  - 8 ((caprylic or octanoic) adj acid\*).tw. (69)
  - 9 exp Decanoic Acids/ (24)
  - 10 ((capric or decanoic) adj acid\*).tw. (14)
  - 11 exp Lauric Acids/ (25)
  - 12 ((lauric or docadecanoic) adj acid\*).tw. (28)
  - 13 exp Myristic Acids/ (21)
  - 14 ((myristic or tetradecanoic) adj acid\*).tw. (27)
  - 15 exp Palmitic Acids/ (159)
  - 16 ((palmitic or hexadecanoic) adj acid\*).tw. (143)
  - 17 exp Stearic Acids/ (64)
  - 18 ((stearic or octadecanoic) adj acid\*).tw. (84)
  - 19 Diet, Carbohydrate-Restricted/ (137)
  - 20 Diet, Fat-Restricted/ (643)
  - 21 Diet, High-Fat/ (18)
  - 22 Diet, Protein-Restricted/ (135)
  - 23 diet\*.tw. (24216)
  - 24 ((low or restricted or free or high) adj1 fat).tw. (3370)
  - 25 23 and 24 (2192)
  - 26 Dairy Products/ (182)
  - 27 Butter/ (77)
  - 28 Cheese/ (42)
  - 29 Ice Cream/ (16)
  - 30 exp Milk/ (2043)
  - 31 Meat/ (254)
  - 32 Meat Products/ (25)
  - 33 exp Poultry/ (113)
  - 34 (butter or milk\* or cheese\* or cream\* or meat\*).tw. (9036)
  - 35 Plant Oils/ (786)
  - 36 (palm adj2 (oil or oils)).tw. (104)
  - 37 (lard or lards or tallow).tw. (29)
  - 38 1 or 2 or 3 or 4 or 5 or 6 or 7 or 8 or 9 or 10 or 11 or 12 or 13 or 14 or 15 or 16 or 17 or 18 or 19 or 20 or 21 or 22 or 25 or 26 or 27 or 28 or 29 or 30 or 31 or 32 or 33 or 34 or 35 or 36 or 37 (19591)
  - 39 Cardiovascular Diseases/ (3337)

- 40 exp Heart Diseases/ (30397)
- 41 exp Vascular Diseases/ (47611)
- 42 Cerebrovascular Disorders/ (1226)
- 43 exp Brain Ischemia/ (1769)
- 44 exp Carotid Artery Diseases/ (734)
- 45 exp Dementia, Vascular/ (253)
- 46 exp Intracranial Arterial Diseases/ (686)
- 47 exp "Intracranial Embolism and Thrombosis"/ (211)
- 48 exp Intracranial Hemorrhages/ (979)
- 49 exp Stroke/ (3427)
- 50 (coronar\* adj5 (bypas\* or graft\* or disease\* or event\*)).tw. (14850)
- 51 (cerebrovasc\* or cardiovasc\* or mortal\* or angina\* or stroke or strokes).tw. (60598)
- 52 (myocardi\* adj5 (infarct\* or revascular\* or ischaemi\* or ischemi\*)).tw. (15331)
- 53 (morbid\* adj5 (heart\* or coronar\* or ischaem\* or ischem\* or myocard\*)).tw. (869)
- 54 (vascular\* adj5 (peripheral\* or disease\* or complication\*)).tw. (3397)
- 55 (heart\* adj5 (disease\* or attack\* or bypass\*)).tw. (8650)
- 56 Diabetes Mellitus/ (1774)
- 57 exp Diabetes Mellitus, Type 2/ (6908)
- 58 diabetes.mp. or diabetic.tw. [mp=ti, ot, ab, sh, hw, kw, tx, ct] (26087)
- 59 Mortality/ (255)
- 60 "Cause of Death"/ (879)
- 61 Fatal Outcome/ (11)
- 62 Hospital Mortality/ (598)
- 63 Mortality, Premature/ (1)
- 64 39 or 40 or 41 or 42 or 43 or 44 or 45 or 46 or 47 or 48 or 49 or 50 or 51 or 52 or 53 or 54 or 55 or 56 or 57 or 58 or 59 or 60 or 61 or 62 or 63 (126910)
- 65 38 and 64 (4244)

**Database: Embase Classic+Embase <1947 to 2013 Week 28>**

**Search Strategy:**

- 
- 1 saturated fatty acid/ (8740)
  - 2 fatty acid\*.tw. (178909)
  - 3 fat intake/ (39999)
  - 4 (saturated adj2 fat\*).tw. (15807)
  - 5 butyric acid/ (10350)
  - 6 ((butyric or butanoic) adj acid\*).tw. (6881)
  - 7 hexanoic acid/ (1581)
  - 8 ((caproic or hexanoic) adj acid\*).tw. (1622)
  - 9 octanoic acid/ (3111)
  - 10 ((caprylic or octanoic) adj acid\*).tw. (1788)
  - 11 exp decanoic acid derivative/ (977)
  - 12 ((capric or decanoic) adj acid\*).tw. (841)
  - 13 lauric acid derivative/ (685)
  - 14 ((lauric or docadecanoic) adj acid\*).tw. (1587)
  - 15 myristic acid derivative/ (589)
  - 16 ((myristic or tetradecanoic) adj acid\*).tw. (1916)
  - 17 palmitic acid derivative/ (4131)
  - 18 ((palmitic or hexadecanoic) adj acid\*).tw. (8535)
  - 19 stearic acid derivative/ (3016)
  - 20 ((stearic or octadecanoic) adj acid\*).tw. (5561)
  - 21 low carbohydrate diet/ (1440)
  - 22 low fat diet/ (6669)
  - 23 lipid diet/ (19491)
  - 24 protein restriction/ (6159)
  - 25 diet\*.tw. (494333)
  - 26 ((low or restricted or free or high) adj1 fat).tw. (41474)
  - 27 25 and 26 (30740)
  - 28 dairy product/ (7808)
  - 29 butter/ (2899)
  - 30 cheese/ (6850)
  - 31 ice cream/ (925)
  - 32 milk/ (60943)
  - 33 meat/ (32908)
  - 34 raw meat/ (209)
  - 35 exp red meat/ (2760)
  - 36 exp white meat/ (13344)
  - 37 (butter or milk\* or cheese\* or cream\* or meat\*).tw. (180425)
  - 38 vegetable oil/ (10682)
  - 39 palm oil/ (1937)
  - 40 (palm adj2 (oil or oils)).tw. (2403)
  - 41 (lard or lards).mp. or tallow.tw. [mp=title, abstract, subject headings, heading word, drug trade name, original title, device manufacturer, drug manufacturer, device trade name, keyword] (4326)
  - 42 1 or 2 or 3 or 4 or 5 or 6 or 7 or 8 or 9 or 10 or 11 or 12 or 13 or 14 or 15 or 16 or 17 or 18 or 19 or 20 or 21 or 22 or 23 or 24 or 27 or 28 or 29 or 30 or 31 or 32 or 33 or 34 or 35 or 36 or 37 or 38 or 39 or 40 or 41 (484627)
  - 43 cardiovascular disease/ (173210)

44 exp heart disease/ (1375887)  
45 exp vascular disease/ (1856001)  
46 cerebrovascular disease/ (48788)  
47 exp brain ischemia/ (97800)  
48 exp carotid artery disease/ (48141)  
49 exp multiinfarct dementia/ (8212)  
50 exp cerebral artery disease/ (3561)  
51 brain embolism/ (5908)  
52 exp occlusive cerebrovascular disease/ (24447)  
53 exp brain hemorrhage/ (85444)  
54 exp cerebrovascular accident/ (60561)  
55 (coronar\* adj5 (bypass\* or graft\* or disease\* or event\*)).tw. (196964)  
56 (myocardi\* adj5 (infarct\* or revascular\* or ischaemi\* or ischemi\*)).tw. (240249)  
57 (morbid\* adj5 (heart\* or coronar\* or ischaem\* or ischem\* or myocard\*)).tw. (6061)  
58 (vascular\* adj5 (peripheral\* or disease\* or complication\*)).tw. (85242)  
59 (cerebrovasc\* or cardiovasc\* or mortal\* or angina\* or stroke or strokes).tw. (1151893)  
60 (heart\* adj5 (disease\* or attack\* or bypass\*)).tw. (195760)  
61 diabetes mellitus/ (352728)  
62 non insulin dependent diabetes mellitus/ (128440)  
63 (diabetes or diabetic).tw. (542973)  
64 mortality/ (524249)  
65 "cause of death"/ (69347)  
66 fatality/ (85732)  
67 premature mortality/ (276)  
68 43 or 44 or 45 or 46 or 47 or 48 or 49 or 50 or 51 or 52 or 53 or 54 or 55 or 56 or 57 or 58 or 59 or 60 or 61 or  
62 or 63 or 64 or 65 or 66 or 67 (4032199)  
69 42 and 68 (69558)  
70 exp case control study/ (84571)  
71 control group/ (58476)  
72 statistical analysis/ (188256)  
73 ((case\* adj5 control\*) or (case adj3 comparison\*) or control group\*).ti,ab. (494579)  
74 cohort.ti,ab. (314269)  
75 cohort analysis/ (151164)  
76 longitudinal study/ (62552)  
77 longitudinal.ti,ab. (164680)  
78 prospective study/ (240811)  
79 prospective.ti,ab. (437872)  
80 retrospective study/ (328430)  
81 retrospective.ti,ab. (354891)  
82 epidemiology/ (187360)  
83 70 or 71 or 72 or 73 or 74 or 75 or 76 or 77 or 78 or 79 or 80 or 81 or 82 (2099158)  
84 69 and 83 (8746)  
85 Animals/ not (Humans/ and Animals/) (1381092)  
86 84 not 85 (8455)  
87 limit 86 to embase (7198)  
88 from 87 keep 7001-7198 (198)

\*\*\*\*\*

**Database: Ovid MEDLINE(R) Daily Update <July 18, 2013>, Ovid MEDLINE(R) In-Process & Other Non-Indexed Citations and Ovid MEDLINE(R) <1946 to Present>**

**Search Strategy:**

---

- 1 Fatty Acids/ (65352)
- 2 fatty acid\*.mp. (190264)
- 3 Dietary Fats/ (42612)
- 4 (saturated adj2 fat\*).mp. [mp=title, abstract, original title, name of substance word, subject heading word, keyword heading word, protocol supplementary concept, rare disease supplementary concept, unique identifier] (13016)
- 5 Butyric Acid/ (2140)
- 6 ((butyric or butanoic) adj acid\*).mp. [mp=title, abstract, original title, name of substance word, subject heading word, keyword heading word, protocol supplementary concept, rare disease supplementary concept, unique identifier] (7597)
- 7 ((caproic or hexanoic) adj acid\*).mp. [mp=title, abstract, original title, name of substance word, subject heading word, keyword heading word, protocol supplementary concept, rare disease supplementary concept, unique identifier] (1235)
- 8 ((caprylic or octanoic) adj acid\*).mp. [mp=title, abstract, original title, name of substance word, subject heading word, keyword heading word, protocol supplementary concept, rare disease supplementary concept, unique identifier] (1853)
- 9 exp Decanoic Acids/ (1603)
- 10 ((capric or decanoic) adj acid\*).mp. [mp=title, abstract, original title, name of substance word, subject heading word, keyword heading word, protocol supplementary concept, rare disease supplementary concept, unique identifier] (1866)
- 11 exp Lauric Acids/ (1527)
- 12 ((lauric or docadecanoic) adj acid\*).mp. [mp=title, abstract, original title, name of substance word, subject heading word, keyword heading word, protocol supplementary concept, rare disease supplementary concept, unique identifier] (1920)
- 13 exp Myristic Acids/ (2529)
- 14 ((myristic or tetradecanoic) adj acid\*).mp. [mp=title, abstract, original title, name of substance word, subject heading word, keyword heading word, protocol supplementary concept, rare disease supplementary concept, unique identifier] (3151)
- 15 exp Palmitic Acids/ (13061)
- 16 ((palmitic or hexadecanoic) adj acid\*).mp. [mp=title, abstract, original title, name of substance word, subject heading word, keyword heading word, protocol supplementary concept, rare disease supplementary concept, unique identifier] (14261)
- 17 exp Stearic Acids/ (4802)
- 18 ((stearic or octadecanoic) adj acid\*).mp. [mp=title, abstract, original title, name of substance word, subject heading word, keyword heading word, protocol supplementary concept, rare disease supplementary concept, unique identifier] (7430)
- 19 Diet, Carbohydrate-Restricted/ (787)
- 20 Diet, Fat-Restricted/ (2789)

- 21 Diet, High-Fat/ (2174)
- 22 Diet, Protein-Restricted/ (1876)
- 23 diet\*.mp. (509729)
- 24 ((low or restricted or free or high) adj1 fat).mp. [mp=title, abstract, original title, name of substance word, subject heading word, keyword heading word, protocol supplementary concept, rare disease supplementary concept, unique identifier] (33871)
- 25 23 and 24 (26849)
- 26 Dairy Products/ (4549)
- 27 Butter/ (1198)
- 28 Cheese/ (4534)
- 29 Ice Cream/ (500)
- 30 exp Milk/ (64581)
- 31 Meat/ (24386)
- 32 Meat Products/ (4506)
- 33 exp Poultry/ (123652)
- 34 (butter or milk\* or cheese\* or cream\* or meat\*).mp. [mp=title, abstract, original title, name of substance word, subject heading word, keyword heading word, protocol supplementary concept, rare disease supplementary concept, unique identifier] (172446)
- 35 Plant Oils/ (13799)
- 36 (palm adj2 (oil or oils)).mp. [mp=title, abstract, original title, name of substance word, subject heading word, keyword heading word, protocol supplementary concept, rare disease supplementary concept, unique identifier] (1982)
- 37 (lard or lards or tallow).mp. [mp=title, abstract, original title, name of substance word, subject heading word, keyword heading word, protocol supplementary concept, rare disease supplementary concept, unique identifier] (2406)
- 38 1 or 2 or 3 or 4 or 5 or 6 or 7 or 8 or 9 or 10 or 11 or 12 or 13 or 14 or 15 or 16 or 17 or 18 or 19 or 20 or 21 or 22 or 25 or 26 or 27 or 28 or 29 or 30 or 31 or 32 or 33 or 34 or 35 or 36 or 37 (542722)
- 39 Cardiovascular Diseases/ (98649)
- 40 exp Heart Diseases/ (880643)
- 41 exp Vascular Diseases/ (1312808)
- 42 Cerebrovascular Disorders/ (43021)
- 43 exp Brain Ischemia/ (80601)
- 44 exp Carotid Artery Diseases/ (36889)
- 45 exp Dementia, Vascular/ (5326)
- 46 exp Intracranial Arterial Diseases/ (46653)
- 47 exp "Intracranial Embolism and Thrombosis"/ (17907)
- 48 exp Intracranial Hemorrhages/ (54032)
- 49 exp Stroke/ (82307)
- 50 (coronar\* adj5 (bypas\* or graft\* or disease\* or event\*)).mp. [mp=title, abstract, original title, name of substance word, subject heading word, keyword heading word, protocol supplementary concept, rare disease supplementary concept, unique identifier] (249654)
- 51 (cerebrovasc\* or cardiovasc\* or mortal\* or angina\* or stroke or strokes).mp. [mp=title, abstract, original title, name of substance word, subject heading word, keyword heading word, protocol supplementary concept, rare disease supplementary concept, unique identifier] (1060157)
- 52 (myocardi\* adj5 (infarct\* or revascular\* or ischaemi\* or ischemi\*)).mp. [mp=title, abstract, original title, name of substance word, subject heading word, keyword heading word, protocol supplementary concept, rare disease supplementary concept, unique identifier] (241640)
- 53 (morbid\* adj5 (heart\* or coronar\* or ischaem\* or ischem\* or myocardi\*)).mp. [mp=title, abstract, original title, name of substance word, subject heading word, keyword heading word, protocol supplementary concept, rare disease supplementary concept, unique identifier] (4596)

- 54 (vascular\* adj5 (peripheral\* or disease\* or complication\*)).mp. [mp=title, abstract, original title, name of substance word, subject heading word, keyword heading word, protocol supplementary concept, rare disease supplementary concept, unique identifier] (93435)
- 55 (heart\* adj5 (disease\* or attack\* or bypass\*)).mp. [mp=title, abstract, original title, name of substance word, subject heading word, keyword heading word, protocol supplementary concept, rare disease supplementary concept, unique identifier] (220824)
- 56 Diabetes Mellitus/ (90088)
- 57 exp Diabetes Mellitus, Type 2/ (84692)
- 58 (diabetes or diabetic).mp. [mp=title, abstract, original title, name of substance word, subject heading word, keyword heading word, protocol supplementary concept, rare disease supplementary concept, unique identifier] (456003)
- 59 Mortality/ (34587)
- 60 "Cause of Death"/ (35319)
- 61 Fatal Outcome/ (49662)
- 62 Hospital Mortality/ (21951)
- 63 Mortality, Premature/ (196)
- 64 39 or 40 or 41 or 42 or 43 or 44 or 45 or 46 or 47 or 48 or 49 or 50 or 51 or 52 or 53 or 54 or 55 or 56 or 57 or 58 or 59 or 60 or 61 or 62 or 63 (2827977)
- 65 38 and 64 (58248)
- 66 exp Case-Control Studies/ (645408)
- 67 Control Groups/ (1518)
- 68 Matched-Pair Analysis/ (4183)
- 69 ((case\* adj5 control\*) or (case adj3 comparison\*) or control group\*).ti,ab. (383654)
- 70 cohort.ti,ab. (243620)
- 71 exp Cohort Studies/ (1335430)
- 72 longitudinal.ti,ab. (139824)
- 73 prospective.ti,ab. (348052)
- 74 retrospective.ti,ab. (263475)
- 75 Epidemiologic Studies/ (6168)
- 76 66 or 67 or 68 or 69 or 70 or 71 or 72 or 73 or 74 or 75 (2036590)
- 77 65 and 76 (7508)
- 78 Animals/ not (Humans/ and Animals/) (3910383)
- 79 77 not 78 (6274)

\*\*\*\*\*



**b) Trans fats**

The searches for your topic on fatty acids and specific morbidities/mortalities were run using the OvidSP search platform in the following database(s): MEDLINE, EMBASE EBM Reviews CCTR, and EBM Reviews HTA and EBM Reviews NHS EED. A search was run using the EBSCOHost search platform in the following database CINAHL. All searches include articles indexed as of November 28, 2012. The search strategy retrieved a total of **18,181** articles. All references were saved in an EndNote library used to identify the **4,162** duplicates. You received the remaining **14,019** unique references to review.

\*\* This search was updated on September 26, 2013\*\*

**MEDLINE:**

The search strategy for OvidSP MEDLINE (1946 to **November 28, 2012**) retrieved **3845** references of which **3753**. I used a combination of MeSH and free text terms for

| Set | History                                                                                                                                | Results | Comments                                           |
|-----|----------------------------------------------------------------------------------------------------------------------------------------|---------|----------------------------------------------------|
| 1   | fatty acids/ or exp fatty acids, unsaturated/                                                                                          | 238528  | Fatty Acids Subject Terms                          |
| 2   | exp Diet/                                                                                                                              | 178565  | Diet Subject Terms                                 |
| 3   | infant formula/ or exp food/                                                                                                           | 986844  | Food Subject Terms                                 |
| 4   | exp plants, edible/ or vegetables/ or plants, genetically modified/                                                                    | 54998   | Vegetable Subject Terms                            |
| 5   | exp plant oils/ or corn oil/ or safflower oil/ or soybean oil/                                                                         | 22227   | Plant Oil Subject terms                            |
| 6   | dietary fats/ or butter/ or margarine/ or fats, unsaturated/                                                                           | 42323   | Dietary Fat Subject Terms                          |
| 7   | Or/1-6                                                                                                                                 | 1314584 | Combined Food, Fat Subject Terms                   |
| 8   | exp Cardiovascular Diseases/                                                                                                           | 1771867 | Selected mortality/morbidity disease subject terms |
| 9   | exp Stroke/                                                                                                                            | 74703   | Selected mortality/morbidity disease subject terms |
| 10  | diabetes mellitus/ or exp diabetes mellitus, type 1/ or exp diabetes mellitus, type 2/ or diabetes, gestational/ or prediabetic state/ | 208676  | Selected mortality/morbidity disease subject terms |
| 11  | mortality/ or "cause of death"/ or fatal outcome/ or hospital mortality/ or mortality, premature/                                      | 126803  | General mortality/morbidity subject terms          |
| 12  | Or/8-11                                                                                                                                | 2026933 | Combined mortality/morbidity                       |

|    |                                                                                                                                                                                                 |          |                           |
|----|-------------------------------------------------------------------------------------------------------------------------------------------------------------------------------------------------|----------|---------------------------|
|    |                                                                                                                                                                                                 |          | disease subject terms     |
| 13 | (conjugat* or unsaturat* or "trans fat*" or ruminant* or bovin* or rumenic* or "animal fat" or (trans adj2 fatty adj2 acid*) or (Trans adj2 isomer*) or "trans-fat*" or (fat* adj2 intake)).mp. | 341697   | Fatty acid textword terms |
| 14 | 7 and 12 and 13                                                                                                                                                                                 | 5027     | Base clinical set results |
| 15 | humans/ not animals/                                                                                                                                                                            | 11319854 | Human limit               |
| 16 | 14 and 15                                                                                                                                                                                       | 3845     | Final Results             |

#### EMBASE

The search strategy for OvidSP Embase <1974 to 2012 Week 47> retrieved **12828** references of which **9845**. I used a combination of EMBASE and free text terms for

| Set | History                                                                                                                                                                                                     | Results | Comments                                           |
|-----|-------------------------------------------------------------------------------------------------------------------------------------------------------------------------------------------------------------|---------|----------------------------------------------------|
| 1   | fatty acid/ or exp unsaturated fatty acid/ or arachidonic acid/ or linoleic acid/ or vaccenic acid/ or (linoleic or linoelaidic or transvaccenic or oleic or vaccenic or ruminic or (fatty adj3 acid*)).mp. | 262303  | Fatty Acids Subject Terms                          |
| 2   | exp diet/ or exp diet restriction/ or (diet or diets or dietary).mp.                                                                                                                                        | 548184  | Diet Subject Terms                                 |
| 3   | artificial milk/ or exp food/ or (infant adj2 formula*).mp. or (milk* or yogurt* or yougurt* or yoghurt* or cheese* cream or creams or creamed or creamer* or kefir).mp.                                    | 626293  | Food Subject Terms                                 |
| 4   | exp vegetable/ or (edible adj2 plant*).mp.                                                                                                                                                                  | 115788  | Vegetable Subject Terms                            |
| 5   | exp vegetable oil/ or ((vegetable or corn or soybean or safflower or plant) adj2 (oil or oils)).mp                                                                                                          | 56175   | Plant Oil Subject terms                            |
| 6   | fat intake/ or cholesterol intake/ or animal product/ or lard/ or (shortening or lard or lards or oleo or oleos or crisco or margarine*).mp.                                                                | 91576   | Dietary Fat Subject Terms                          |
| 7   | Or/1-6                                                                                                                                                                                                      | 1294549 | Combined Food, Fat Subject Terms                   |
| 8   | exp cardiovascular disease/                                                                                                                                                                                 | 2745491 | Selected mortality/morbidity disease subject terms |
| 9   | cerebrovascular accident/ or cardioembolic stroke/ or lacunar stroke/                                                                                                                                       | 45071   | Selected mortality/morbidity disease subject terms |
| 10  | diabetes mellitus/ or exp diabetic angiopathy/ or diabetic cardiomyopathy/ or diabetic coma/ or diabetic foot/ or diabetic hypertension/ or diabetic                                                        | 626794  | Selected mortality/morbidity disease subject terms |

|    |                                                                                                                                                                                                                                                                                                                                                                                                                                                                                                                                                                                                                                                                                                                                                                                                                                                                                                                        |         |                                                    |
|----|------------------------------------------------------------------------------------------------------------------------------------------------------------------------------------------------------------------------------------------------------------------------------------------------------------------------------------------------------------------------------------------------------------------------------------------------------------------------------------------------------------------------------------------------------------------------------------------------------------------------------------------------------------------------------------------------------------------------------------------------------------------------------------------------------------------------------------------------------------------------------------------------------------------------|---------|----------------------------------------------------|
|    | ketoacidosis/ or diabetic macular edema/ or diabetic nephropathy/ or diabetic neuropathy/ or diabetic obesity/ or diabetic retinopathy/ or insulin dependent diabetes mellitus/ or lipoatrophic diabetes mellitus/ or non insulin dependent diabetes mellitus/ or nonketotic diabetic coma/ or wolfram syndrome/ or pregnancy diabetes mellitus/ or diabetes mellitus/ or exp diabetic angiopathy/ or diabetic cardiomyopathy/ or diabetic coma/ or diabetic foot/ or diabetic hypertension/ or diabetic ketoacidosis/ or diabetic macular edema/ or diabetic nephropathy/ or diabetic neuropathy/ or diabetic obesity/ or diabetic retinopathy/ or insulin dependent diabetes mellitus/ or lipoatrophic diabetes mellitus/ or non insulin dependent diabetes mellitus/ or nonketotic diabetic coma/ or wolfram syndrome/ or pregnancy diabetes mellitus/ or impaired glucose tolerance/ or (diabetic or diabetes).mp. |         |                                                    |
| 11 | mortality/ or cancer mortality/ or cardiovascular mortality/ or childhood mortality/ or infant mortality/ or maternal mortality/ or premature mortality/ or standardized mortality ratio/ or surgical mortality/ or death/ or brain death/ or "cause of death"/ or exp child death/ or dying/ or fatality/ or heart death/ or sudden death/ or mortality/                                                                                                                                                                                                                                                                                                                                                                                                                                                                                                                                                              | 784588  | General mortality/morbidity subject terms          |
| 12 | Or/8-11                                                                                                                                                                                                                                                                                                                                                                                                                                                                                                                                                                                                                                                                                                                                                                                                                                                                                                                | 3646186 | Combined mortality/morbidity disease subject terms |
| 13 | (conjugat* or unsaturat* or "trans fat*" or ruminant* or bovin* or rumenic* or "animal fat" or (trans adj2 fatty adj2 acid*) or (Trans adj2 isomer*) or "trans-fat*" or (fat* adj2 intake)).mp.                                                                                                                                                                                                                                                                                                                                                                                                                                                                                                                                                                                                                                                                                                                        | 432935  | Fatty acid textword terms                          |
| 14 | 7 and 12 and 13                                                                                                                                                                                                                                                                                                                                                                                                                                                                                                                                                                                                                                                                                                                                                                                                                                                                                                        | 16242   | Base clinical set results                          |
| 15 | Human/ not animal/                                                                                                                                                                                                                                                                                                                                                                                                                                                                                                                                                                                                                                                                                                                                                                                                                                                                                                     | 406     | Human limit                                        |
| 16 | 14 and 15                                                                                                                                                                                                                                                                                                                                                                                                                                                                                                                                                                                                                                                                                                                                                                                                                                                                                                              | 12828   | Final Results                                      |

### EBM Reviews CCTR

The search strategy for Database: EBM Reviews - Cochrane Central Register of Controlled Trials <November 2012> retrieved **598** references of which **57**. I used a combination of MeSH, EMBASE descriptor and free text terms for

| Set | History | Results | Comments |
|-----|---------|---------|----------|
|-----|---------|---------|----------|

|    |                                                                                                                                                                                                                                                                                                                                                                                                                                                                                                                                                                                                                                                                                          |       |                                                    |
|----|------------------------------------------------------------------------------------------------------------------------------------------------------------------------------------------------------------------------------------------------------------------------------------------------------------------------------------------------------------------------------------------------------------------------------------------------------------------------------------------------------------------------------------------------------------------------------------------------------------------------------------------------------------------------------------------|-------|----------------------------------------------------|
| 1  | fatty acids/ or exp fatty acids, unsaturated/ or (linoleic or linoelaidic or transvaccenic or oleic or vaccenic or ruminic or (fatty adj3 acid*)).mp. or fatty acid/ or exp unsaturated fatty acid/ or arachidonic acid/ or linoleic acid/ or vaccenic acid/                                                                                                                                                                                                                                                                                                                                                                                                                             | 12923 | Fatty Acids Subject Terms                          |
| 2  | exp diet/ or exp diet restriction/ or (diet or diets or dietary).mp.                                                                                                                                                                                                                                                                                                                                                                                                                                                                                                                                                                                                                     | 29723 | Diet Subject Terms                                 |
| 3  | infant formula/ or exp food/ or (infant adj2 formula*).mp. or (milk* or yogurt* or yoghurt* or cheese* cream or creams or creamed or creamer* or kefir).mp. or artificial milk/ or exp food/                                                                                                                                                                                                                                                                                                                                                                                                                                                                                             | 29426 | Food Subject Terms                                 |
| 4  | exp plants, edible/ or vegetables/ or exp vegetable/ or (edible adj2 plant*).mp.                                                                                                                                                                                                                                                                                                                                                                                                                                                                                                                                                                                                         | 1911  | Vegetable Subject Terms                            |
| 5  | exp plant oils/ or corn oil/ or safflower oil/ or soybean oil/ or ((corn or soybean or safflower or plant) adj2 (oil or oils)).mp. or exp vegetable oil/ or ((vegetable or corn or soybean or safflower or plant) adj2 (oil or oils)).mp.                                                                                                                                                                                                                                                                                                                                                                                                                                                | 1593  | Plant Oil Subject terms                            |
| 6  | dietary fats/ or butter/ or margarine/ or fats, unsaturated/ or (shortening or lard or lards or oleo or oleos or crisco or margarine*).mp. or fat intake/ or cholesterol intake/ or animal product/ or lard/                                                                                                                                                                                                                                                                                                                                                                                                                                                                             | 4306  | Dietary Fat Subject Terms                          |
| 7  | Or/1-6                                                                                                                                                                                                                                                                                                                                                                                                                                                                                                                                                                                                                                                                                   | 54691 | Combined Food, Fat Subject Terms                   |
| 8  | exp Cardiovascular Diseases/ or exp cardiovascular disease/                                                                                                                                                                                                                                                                                                                                                                                                                                                                                                                                                                                                                              | 59077 | Selected mortality/morbidity disease subject terms |
| 9  | exp Stroke/ or cerebrovascular accident/ or cardioembolic stroke/ or lacunar stroke/                                                                                                                                                                                                                                                                                                                                                                                                                                                                                                                                                                                                     | 3231  | Selected mortality/morbidity disease subject terms |
| 10 | diabetes mellitus/ or exp diabetes mellitus, type 1/ or exp diabetes mellitus, type 2/ or diabetes, gestational/ or prediabetic state/ or diabetic.mp. or diabetes.mp. or ()<br>diabetes mellitus/ or exp diabetic angiopathy/ or diabetic cardiomyopathy/ or diabetic coma/ or diabetic foot/ or diabetic hypertension/ or diabetic ketoacidosis/ or diabetic macular edema/ or diabetic nephropathy/ or diabetic neuropathy/ or diabetic obesity/ or diabetic retinopathy/ or insulin dependent diabetes mellitus/ or lipoatrophic diabetes mellitus/ or non insulin dependent diabetes mellitus/ or nonketotic diabetic coma/ or wolfram syndrome/ or pregnancy diabetes mellitus/ or | 22222 | Selected mortality/morbidity disease subject terms |

|    |                                                                                                                                                                                                                                                                                                                                                                                                                                                                                                                                                                    |       |                                                    |
|----|--------------------------------------------------------------------------------------------------------------------------------------------------------------------------------------------------------------------------------------------------------------------------------------------------------------------------------------------------------------------------------------------------------------------------------------------------------------------------------------------------------------------------------------------------------------------|-------|----------------------------------------------------|
|    | diabetes mellitus/ or exp diabetic angiopathy/ or diabetic cardiomyopathy/ or diabetic coma/ or diabetic foot/ or diabetic hypertension/ or diabetic ketoacidosis/ or diabetic macular edema/ or diabetic nephropathy/ or diabetic neuropathy/ or diabetic obesity/ or diabetic retinopathy/ or insulin dependent diabetes mellitus/ or lipoatrophic diabetes mellitus/ or non insulin dependent diabetes mellitus/ or nonketotic diabetic coma/ or wolfram syndrome/ or pregnancy diabetes mellitus/ or impaired glucose tolerance/ or (diabetic or diabetes).mp. |       |                                                    |
| 11 | mortality/ or "cause of death"/ or fatal outcome/ or hospital mortality/ or mortality, premature/ or cancer mortality/ or cardiovascular mortality/ or childhood mortality/ or infant mortality/ or maternal mortality/ or premature mortality/ or standardized mortality ratio/ or surgical mortality/ or death/ or brain death/ or exp child death/ or dying/ or fatality/ or heart death/ or sudden death/                                                                                                                                                      | 77535 | General mortality/morbidity subject terms          |
| 12 | Or/8-10                                                                                                                                                                                                                                                                                                                                                                                                                                                                                                                                                            | 2560  | Combined mortality/morbidity disease subject terms |
| 13 | (conjugat* or unsaturat* or "trans fat*" or ruminant* or bovin* or ruminic* or "animal fat" or (trans adj2 fatty adj2 acid*) or (Trans adj2 isomer*) or "trans-fat*" or (fat* adj2 intake)).mp.                                                                                                                                                                                                                                                                                                                                                                    | 6313  | Fatty acid textword terms                          |
| 14 | 7 and 12 and 13                                                                                                                                                                                                                                                                                                                                                                                                                                                                                                                                                    | 598   | Final Results                                      |

### EBM Reviews HTA

The search strategy for OvidSP EBM Reviews - Health Technology Assessment <4th Quarter 2012> retrieved 5 references of which 5 were unique. I used a combination of MeSH, EMBASE descriptors and free text terms for

| Set | History                                                                                                                                                                                                                                                      | Results | Comments                  |
|-----|--------------------------------------------------------------------------------------------------------------------------------------------------------------------------------------------------------------------------------------------------------------|---------|---------------------------|
| 1   | fatty acids/ or exp fatty acids, unsaturated/ or (linoleic or linoelaidic or transvaccenic or oleic or vaccenic or ruminic or (fatty adj3 acid*)).mp. or fatty acid/ or exp unsaturated fatty acid/ or arachidonic acid/ or linoleic acid/ or vaccenic acid/ | 32      | Fatty Acids Subject Terms |
| 2   | exp diet/ or exp diet restriction/ or (diet or diets or dietary).mp.                                                                                                                                                                                         | 113     | Diet Subject Terms        |
| 3   | infant formula/ or exp food/ or (infant adj2                                                                                                                                                                                                                 | 60      | Food Subject Terms        |

|    |                                                                                                                                                                                                                                                                                                                                                                                                                                                                                                                                                                                                                                                                                                                                                                                                                                                                                                                                                                                                                                                                                                                                                    |      |                                                    |
|----|----------------------------------------------------------------------------------------------------------------------------------------------------------------------------------------------------------------------------------------------------------------------------------------------------------------------------------------------------------------------------------------------------------------------------------------------------------------------------------------------------------------------------------------------------------------------------------------------------------------------------------------------------------------------------------------------------------------------------------------------------------------------------------------------------------------------------------------------------------------------------------------------------------------------------------------------------------------------------------------------------------------------------------------------------------------------------------------------------------------------------------------------------|------|----------------------------------------------------|
|    | formula*).mp. or (milk* or yogurt* or yoghurt* or cheese* cream or creams or creamed or creamer* or kefir).mp. or artificial milk/ or exp food/                                                                                                                                                                                                                                                                                                                                                                                                                                                                                                                                                                                                                                                                                                                                                                                                                                                                                                                                                                                                    |      |                                                    |
| 4  | exp plants, edible/ or vegetables/ or exp vegetable/ or (edible adj2 plant*).mp.                                                                                                                                                                                                                                                                                                                                                                                                                                                                                                                                                                                                                                                                                                                                                                                                                                                                                                                                                                                                                                                                   | 2    | Vegetable Subject Terms                            |
| 5  | exp plant oils/ or corn oil/ or safflower oil/ or soybean oil/ or ((corn or soybean or safflower or plant) adj2 (oil or oils)).mp. or exp vegetable oil/ or ((vegetable or corn or soybean or safflower or plant) adj2 (oil or oils)).mp.                                                                                                                                                                                                                                                                                                                                                                                                                                                                                                                                                                                                                                                                                                                                                                                                                                                                                                          | 1    | Plant Oil Subject terms                            |
| 6  | dietary fats/ or butter/ or margarine/ or fats, unsaturated/ or (shortening or lard or lards or oleo or oleos or crisco or margarine*).mp. or fat intake/ or cholesterol intake/ or animal product/ or lard/                                                                                                                                                                                                                                                                                                                                                                                                                                                                                                                                                                                                                                                                                                                                                                                                                                                                                                                                       | 3    | Dietary Fat Subject Terms                          |
| 7  | Or/1-6                                                                                                                                                                                                                                                                                                                                                                                                                                                                                                                                                                                                                                                                                                                                                                                                                                                                                                                                                                                                                                                                                                                                             | 186  | Combined Food, Fat Subject Terms                   |
| 8  | exp Cardiovascular Diseases/ or exp cardiovascular disease/                                                                                                                                                                                                                                                                                                                                                                                                                                                                                                                                                                                                                                                                                                                                                                                                                                                                                                                                                                                                                                                                                        | 1082 | Selected mortality/morbidity disease subject terms |
| 9  | exp Stroke/ or cerebrovascular accident/ or cardioembolic stroke/ or lacunar stroke/                                                                                                                                                                                                                                                                                                                                                                                                                                                                                                                                                                                                                                                                                                                                                                                                                                                                                                                                                                                                                                                               | 1    | Selected mortality/morbidity disease subject terms |
| 10 | diabetes mellitus/ or exp diabetes mellitus, type 1/ or exp diabetes mellitus, type 2/ or diabetes, gestational/ or prediabetic state/ or diabetic.mp. or diabetes.mp. or ()<br>diabetes mellitus/ or exp diabetic angiopathy/ or diabetic cardiomyopathy/ or diabetic coma/ or diabetic foot/ or diabetic hypertension/ or diabetic ketoacidosis/ or diabetic macular edema/ or diabetic nephropathy/ or diabetic neuropathy/ or diabetic obesity/ or diabetic retinopathy/ or insulin dependent diabetes mellitus/ or lipotrophic diabetes mellitus/ or non insulin dependent diabetes mellitus/ or nonketotic diabetic coma/ or wolfram syndrome/ or pregnancy diabetes mellitus/ or diabetes mellitus/ or exp diabetic angiopathy/ or diabetic cardiomyopathy/ or diabetic coma/ or diabetic foot/ or diabetic hypertension/ or diabetic ketoacidosis/ or diabetic macular edema/ or diabetic nephropathy/ or diabetic neuropathy/ or diabetic obesity/ or diabetic retinopathy/ or insulin dependent diabetes mellitus/ or lipotrophic diabetes mellitus/ or non insulin dependent diabetes mellitus/ or nonketotic diabetic coma/ or wolfram | 354  | Selected mortality/morbidity disease subject terms |

|    |                                                                                                                                                                                                                                                                                                                                                                                                               |      |                                                    |
|----|---------------------------------------------------------------------------------------------------------------------------------------------------------------------------------------------------------------------------------------------------------------------------------------------------------------------------------------------------------------------------------------------------------------|------|----------------------------------------------------|
|    | syndrome/ or pregnancy diabetes mellitus/ or impaired glucose tolerance/ or (diabetic or diabetes).mp.                                                                                                                                                                                                                                                                                                        |      |                                                    |
| 11 | mortality/ or "cause of death"/ or fatal outcome/ or hospital mortality/ or mortality, premature/ or cancer mortality/ or cardiovascular mortality/ or childhood mortality/ or infant mortality/ or maternal mortality/ or premature mortality/ or standardized mortality ratio/ or surgical mortality/ or death/ or brain death/ or exp child death/ or dying/ or fatality/ or heart death/ or sudden death/ | 15   | General mortality/morbidity subject terms          |
| 12 | Or/8-10                                                                                                                                                                                                                                                                                                                                                                                                       | 1385 | Combined mortality/morbidity disease subject terms |
| 13 | (conjugat* or unsaturat* or "trans fat*" or ruminant* or bovin* or ruminic* or "animal fat" or (trans adj2 fatty adj2 acid*) or (Trans adj2 isomer*) or "trans-fat*" or (fat* adj2 intake)).mp.                                                                                                                                                                                                               | 15   | Fatty acid textword terms                          |
| 14 | 7 and 12 and 13                                                                                                                                                                                                                                                                                                                                                                                               | 5    | Final Results                                      |

#### EBM Reviews NHS Economic Evaluation Database

The search strategy for EBM Reviews - NHS Economic Evaluation Database <4th Quarter 2012> retrieved 9 references of which 9 were unique. I used a combination of MeSH, EMBASE descriptors and free text terms for

| Set | History                                                                                                                                                                                                                                                      | Results | Comments                  |
|-----|--------------------------------------------------------------------------------------------------------------------------------------------------------------------------------------------------------------------------------------------------------------|---------|---------------------------|
| 1   | fatty acids/ or exp fatty acids, unsaturated/ or (linoleic or linoelaidic or transvaccenic or oleic or vaccenic or ruminic or (fatty adj3 acid*)).mp. or fatty acid/ or exp unsaturated fatty acid/ or arachidonic acid/ or linoleic acid/ or vaccenic acid/ | 110     | Fatty Acids Subject Terms |
| 2   | exp diet/ or exp diet restriction/ or (diet or diets or dietary).mp.                                                                                                                                                                                         | 333     | Diet Subject Terms        |
| 3   | infant formula/ or exp food/ or (infant adj2 formula*).mp. or (milk* or yogurt* or yoghurt* or cheese* cream or creams or creamed or creamer* or kefir).mp. or artificial milk/ or exp food/                                                                 | 174     | Food Subject Terms        |
| 4   | exp plants, edible/ or vegetables/ or exp vegetable/ or (edible adj2 plant*).mp.                                                                                                                                                                             | 9       | Vegetable Subject Terms   |
| 5   | exp plant oils/ or corn oil/ or safflower oil/ or soybean oil/ or ((corn or soybean or safflower or plant) adj2 (oil or oils)).mp. or exp vegetable oil/ or ((vegetable or corn or soybean or safflower or plant)                                            | 8       | Plant Oil Subject terms   |

|    |                                                                                                                                                                                                                                                                                                                                                                                                                                                                                                                                                                                                                                                                                                                                                                                                                                                                                                                                                                                                                                                                                                                                                                                                                                                             |      |                                                    |
|----|-------------------------------------------------------------------------------------------------------------------------------------------------------------------------------------------------------------------------------------------------------------------------------------------------------------------------------------------------------------------------------------------------------------------------------------------------------------------------------------------------------------------------------------------------------------------------------------------------------------------------------------------------------------------------------------------------------------------------------------------------------------------------------------------------------------------------------------------------------------------------------------------------------------------------------------------------------------------------------------------------------------------------------------------------------------------------------------------------------------------------------------------------------------------------------------------------------------------------------------------------------------|------|----------------------------------------------------|
|    | adj2 (oil or oils).mp.                                                                                                                                                                                                                                                                                                                                                                                                                                                                                                                                                                                                                                                                                                                                                                                                                                                                                                                                                                                                                                                                                                                                                                                                                                      |      |                                                    |
| 6  | dietary fats/ or butter/ or margarine/ or fats, unsaturated/ or (shortening or lard or lards or oleo or oleos or crisco or margarine*).mp. or fat intake/ or cholesterol intake/ or animal product/ or lard/                                                                                                                                                                                                                                                                                                                                                                                                                                                                                                                                                                                                                                                                                                                                                                                                                                                                                                                                                                                                                                                | 36   | Dietary Fat Subject Terms                          |
| 7  | Or/1-6                                                                                                                                                                                                                                                                                                                                                                                                                                                                                                                                                                                                                                                                                                                                                                                                                                                                                                                                                                                                                                                                                                                                                                                                                                                      | 569  | Combined Food, Fat Subject Terms                   |
| 8  | exp Cardiovascular Diseases/ or exp cardiovascular disease/                                                                                                                                                                                                                                                                                                                                                                                                                                                                                                                                                                                                                                                                                                                                                                                                                                                                                                                                                                                                                                                                                                                                                                                                 | 1819 | Selected mortality/morbidity disease subject terms |
| 9  | exp Stroke/ or cerebrovascular accident/ or cardioembolic stroke/ or lacunar stroke/                                                                                                                                                                                                                                                                                                                                                                                                                                                                                                                                                                                                                                                                                                                                                                                                                                                                                                                                                                                                                                                                                                                                                                        | 5    | Selected mortality/morbidity disease subject terms |
| 10 | diabetes mellitus/ or exp diabetes mellitus, type 1/ or exp diabetes mellitus, type 2/ or diabetes, gestational/ or prediabetic state/ or diabetic.mp. or diabetes.mp. or ()<br>diabetes mellitus/ or exp diabetic angiopathy/ or diabetic cardiomyopathy/ or diabetic coma/ or diabetic foot/ or diabetic hypertension/ or diabetic ketoacidosis/ or diabetic macular edema/ or diabetic nephropathy/ or diabetic neuropathy/ or diabetic obesity/ or diabetic retinopathy/ or insulin dependent diabetes mellitus/ or lipoatrophic diabetes mellitus/ or non insulin dependent diabetes mellitus/ or nonketotic diabetic coma/ or wolfram syndrome/ or pregnancy diabetes mellitus/ or diabetes mellitus/ or exp diabetic angiopathy/ or diabetic cardiomyopathy/ or diabetic coma/ or diabetic foot/ or diabetic hypertension/ or diabetic ketoacidosis/ or diabetic macular edema/ or diabetic nephropathy/ or diabetic neuropathy/ or diabetic obesity/ or diabetic retinopathy/ or insulin dependent diabetes mellitus/ or lipoatrophic diabetes mellitus/ or non insulin dependent diabetes mellitus/ or nonketotic diabetic coma/ or wolfram syndrome/ or pregnancy diabetes mellitus/ or impaired glucose tolerance/ or (diabetic or diabetes).mp. | 879  | Selected mortality/morbidity disease subject terms |
| 11 | mortality/ or "cause of death"/ or fatal outcome/ or hospital mortality/ or mortality, premature/ or cancer mortality/ or cardiovascular mortality/ or childhood mortality/ or infant mortality/ or maternal mortality/ or premature mortality/ or standardized mortality ratio/ or surgical mortality/ or death/ or brain death/                                                                                                                                                                                                                                                                                                                                                                                                                                                                                                                                                                                                                                                                                                                                                                                                                                                                                                                           | 186  | General mortality/morbidity subject terms          |



|    |                                                                                                                                                                                                 |      |                                                    |
|----|-------------------------------------------------------------------------------------------------------------------------------------------------------------------------------------------------|------|----------------------------------------------------|
|    | or exp child death/ or dying/ or fatality/ or heart death/ or sudden death/                                                                                                                     |      |                                                    |
| 12 | Or/8-10                                                                                                                                                                                         | 2520 | Combined mortality/morbidity disease subject terms |
| 13 | (conjugat* or unsaturat* or "trans fat*" or ruminant* or bovin* or rumenic* or "animal fat" or (trans adj2 fatty adj2 acid*) or (Trans adj2 isomer*) or "trans-fat*" or (fat* adj2 intake)).mp. | 114  | Fatty acid textword terms                          |
| 14 | 7 and 12 and 13                                                                                                                                                                                 | 9    | Final Results                                      |

**CINAHL:**

The search strategy for EBSCOHost CINAHL (1983 to November 28, 2012) retrieved **896** references of which **344** were unique. I used a combination of CINAHL descriptors and free text terms for

| Set | History                                                                                                                                                                                       | Results | Comments                                           |
|-----|-----------------------------------------------------------------------------------------------------------------------------------------------------------------------------------------------|---------|----------------------------------------------------|
| S1  | S1 (MH "Fatty Acids") OR (MH "Fatty Acids, Unsaturated+") OR (TX linoleic OR linoelaidic OR transvaccenic OR oleic OR vaccenic OR ruminic OR (fatty N3 acid*))                                | 13,796  | Fatty Acids Subject Terms                          |
| S2  | (MH "Diet+") OR (TX diet or diets or dietary)                                                                                                                                                 | 90,079  | Diet Subject Terms                                 |
| S3  | (MH "Infant Formula") OR (MH "Food+") OR (TX (infant N2 formula*) OR milk* or yogurt* or yougurt* or cheese* cream or creams or creamed or creamer* or kefir)                                 | 61,708  | Food Subject Terms                                 |
| S4  | (MH "Plants, Edible+") OR (MH "Vegetables+")                                                                                                                                                  | 15,039  | Vegetable Subject Terms                            |
| S5  | (MH "Plant Oils") OR (MH "Corn Oil") OR (MH "Safflower Oil") OR (MH "Soybean Oil") OR (TX (corn or soybean or safflower or plant) N2 (oil or oils))                                           | 1,944   | Plant Oil Subject terms                            |
| S6  | (MH "Butter") OR (MH "Cholesterol, Dietary") OR (MH "Margarine") OR (MH "Olive Oil") OR (MH "Fats, Unsaturated+") OR (TX shortening or lard or lards or oleo or oleos or crisco or margarine) | 3,697   | Dietary Fat Subject Terms                          |
| S7  | S1 OR S2 OR S3 OR S4 OR S5 OR S6                                                                                                                                                              | 127,380 | Combined Food, Fat Subject Terms                   |
| S8  | (MH "Cardiovascular Diseases+")                                                                                                                                                               | 219,883 | Selected mortality/morbidity disease subject terms |
| S9  | (MH "Stroke") OR (MH "Stroke Patients")                                                                                                                                                       | 28,195  | Selected mortality/morbidity disease subject terms |
| S10 | (MH "Diabetes Mellitus") OR (MH "Diabetes Mellitus,                                                                                                                                           | 76,834  | Selected                                           |

|            |                                                                                                                                                                              |         |                                                    |
|------------|------------------------------------------------------------------------------------------------------------------------------------------------------------------------------|---------|----------------------------------------------------|
|            | Type 1") OR (MH "Diabetes Mellitus, Type 2") OR (MH "Diabetes Mellitus, Gestational") OR (MH "Prediabetic State") OR (TX diabetic OR diabetes)                               |         | mortality/morbidity disease subject terms          |
| S11        | (MH "Mortality") OR (MH "Cause of Death") OR (MH "Hospital Mortality") OR (MH "Fatal Outcome") OR (TX prematur* N2 mortal*)                                                  | 2560    | General mortality/morbidity subject terms          |
| <b>S12</b> | S12 S8 OR S9 OR S10 OR S11                                                                                                                                                   | 292,321 | Combined mortality/morbidity disease subject terms |
| S13        | (TX conjugat* OR unsaturat* OR (trans N2 fat*) OR ruminant* OR bovin* OR rumenic* OR (animal N2 fat) OR (trans N2 fatty N2 acid*) OR (Trans N2 isomer*) OR (fat* N2 intake)) | 6,843   | Fatty acid textword terms                          |
| S14        | S7 AND S12 AND S13                                                                                                                                                           | 965     | Base Clinical Set                                  |
| S15        | ((MH "Human") OR (TX human*))                                                                                                                                                | 806,042 | Human terms                                        |
| S16        | NOT (MH "Animals+") OR (MH "Birds+") OR (MH "Mammals+") OR (MH "Reptiles+") OR (TX animal*)                                                                                  | 784,188 | Animal terms                                       |
| S17        | S14 AND (S15 OR S16)                                                                                                                                                         | 363     | Group 3 results                                    |
| S18        | S14 AND (S15 NOT S16)                                                                                                                                                        | 533     | Combined final results Search 1                    |
| S19        | S17 OR S18                                                                                                                                                                   | 896     | FINAL Results                                      |

**WHO Trans-fatty acids systematic review Extraction form**

|                    |
|--------------------|
| Reviewer initials: |
| Date:              |
| Article code:      |

|                                                                                                                                                                                                                                                                                                                                                                                            |                                        |                                                                                                                                                                                                                                                             |                 |                         |
|--------------------------------------------------------------------------------------------------------------------------------------------------------------------------------------------------------------------------------------------------------------------------------------------------------------------------------------------------------------------------------------------|----------------------------------------|-------------------------------------------------------------------------------------------------------------------------------------------------------------------------------------------------------------------------------------------------------------|-----------------|-------------------------|
| Article first author:                                                                                                                                                                                                                                                                                                                                                                      | Journal:                               | Year:                                                                                                                                                                                                                                                       | Volume (issue): | Pages:                  |
| Title:                                                                                                                                                                                                                                                                                                                                                                                     |                                        |                                                                                                                                                                                                                                                             | Name of Cohort: |                         |
| <b>Design</b><br><input type="checkbox"/> Prospective cohort <input type="checkbox"/> Nested Case-control <input type="checkbox"/> Case-control <input type="checkbox"/> Retrospective cohort <input type="checkbox"/> Case-series <input type="checkbox"/> Meta-analysis <input type="checkbox"/> Review <input type="checkbox"/> Other _____<br>If prospective, indicate duration: _____ |                                        |                                                                                                                                                                                                                                                             |                 |                         |
| Country of conduct:                                                                                                                                                                                                                                                                                                                                                                        | Genders:<br># Men: _____ # Women _____ | Sample size (n):<br>Cases: _____ Control: _____                                                                                                                                                                                                             |                 |                         |
| <b>Sample description</b> (disease status [healthy, diabetes, hyperlipidemia, etc.], gender, age, nationality, race, occupation, etc.):                                                                                                                                                                                                                                                    |                                        |                                                                                                                                                                                                                                                             |                 | Age (mean ± SD, range): |
| <b>Method of recruitment:</b><br>Cases:<br><br>Controls:                                                                                                                                                                                                                                                                                                                                   |                                        |                                                                                                                                                                                                                                                             |                 |                         |
| Duration of Follow-Up                                                                                                                                                                                                                                                                                                                                                                      | What trans-fats were assessed?         | Method of trans assessment?<br>Dietary                      Biomarker                                                                                                                                                                                       |                 |                         |
| What outcomes were assessed (check all that apply)?<br><input type="checkbox"/> CHD <input type="checkbox"/> MI <input type="checkbox"/> CVD <input type="checkbox"/> Stroke <input type="checkbox"/> Cause-specific mortality <input type="checkbox"/> Total mortality <input type="checkbox"/> Other: _____                                                                              |                                        | How outcome was confirmed (check all that apply)?<br><input type="checkbox"/> self-report <input type="checkbox"/> MD confirmed <input type="checkbox"/> other: _____                                                                                       |                 |                         |
| What models were presented?<br><input type="checkbox"/> Unadjusted<br><input type="checkbox"/> Age-adjusted<br><input type="checkbox"/> Multivariate adjusted<br>List confounders: _____<br>_____<br>_____                                                                                                                                                                                 |                                        | Statistical analyses (COX PH; Logistic Regression etc):<br><br>Stratified? <input type="checkbox"/> No <input type="checkbox"/> Sex <input type="checkbox"/> Other: _____<br><input type="checkbox"/> Other: _____<br><input type="checkbox"/> Other: _____ |                 |                         |
| Sensitivity analyses? Describe.                                                                                                                                                                                                                                                                                                                                                            |                                        |                                                                                                                                                                                                                                                             |                 |                         |
