# Supplementary material
Source: PubMed Central journal article supplement (PMC4784800)
Supplement: sour025275.ww2_default.pdf [file sour025275.ww2_default.pdf]

**Appendix 2:**

Supplementary tables

*(posted as supplied by authors)*

## Contents

1. **eTable 1.** Summary of measurement techniques of industrial, total, and ruminant TFA in prospective cohort studies. (p3)
2. **eTable 2.** Characteristics of included prospective cohort studies of saturated fatty acids and health outcomes. (FA=fatty acids; DM=diabetes mellitus; CVD=cardiovascular disease; BMI=body mass index; MI=myocardial infarction; CHD=coronary heart disease; BP=blood pressure; ECG=electrocardiogram) (p11)
3. **eTable 3.** Characteristics of included nested case-control, and case-cohort studies of saturated fatty acids and health outcomes. (FA=fatty acids; DM=diabetes mellitus; CVD=cardiovascular disease; BMI=body mass index; MI=myocardial infarction; CHD=coronary heart disease; BP=blood pressure; ECG=electrocardiogram) (p27)
4. **eTable 4.** Characteristics of included retrospective case-control studies of saturated fatty acids and health outcomes. (FA=fatty acids; DM=diabetes mellitus; CVD=cardiovascular disease; BMI=body mass index; MI=myocardial infarction; CHD=coronary heart disease; BP=blood pressure; ECG=electrocardiogram) (p30)
5. **eTable 5.** Risk of bias of included reports from prospective cohort studies as assessed with the Newcastle-Ottawa Scale (p32)
6. **eTable 6.** Risk of bias of included prospective nested case-control/case-cohort and retrospective case-control studies as assessed with the Newcastle-Ottawa Scale (p37)
7. **eTable 7.** Subgroup Analyses: Saturated fat and CHD Mortality (cohort studies) (p40)
8. **eTable 8.** Subgroup Analyses: Saturated fat and CVD Mortality (cohort studies) (p41)
9. **eTable 9.** Subgroup Analyses: Saturated fat and total CHD (cohort studies) (p42)
10. **eTable 10.** Subgroup Analyses: Saturated fat and ischemic stroke (cohort studies) (p43)
11. **eTable 11.** Characteristics of included prospective cohort studies of trans fatty acids and health outcomes. (p44)
12. **eTable 12.** Characteristics of included prospective nested case-control and case-cohort of *trans* fatty acids and health outcomes. (p51)
13. **eTable 13.** Characteristics of included retrospective case-control studies of *trans* fatty acids and health outcomes. (p54)
14. **eTable 14.** Pooled multivariable RR of CHD associated with a 2% increase in TFA intake at the expense of carbohydrate. (p60)
15. **eTable 15.** Pooled multivariable RR of CHD mortality associated with a 2% increase in TFA intake at the expense of carbohydrate. (p60)
16. **eTable 16.** Pooled multivariable RR of type 2 diabetes associated with a 2% increase in TFA intake at the expense of carbohydrate. (p61)
17. **eTable 17.** Pooled multivariable RR of ischemic stroke associated with a 2% increase in TFA intake at the expense of carbohydrate. (p61)
18. **eTable 18.** GRADE Evidence Profile for prospective cohort studies of trans-fatty acids and health outcomes limiting analyses to those studies with a “highest” exposure category estimated >1% of dietary energy (Explanatory notes appear at the end of this document) (p62)
19. **eTable 19.** GRADE Evidence Profile for prospective cohort studies of trans-fatty acids and health outcomes comparing highest vs. Lowest exposure levels, where referent group TFA reported (or estimated to be) <1% of energy. (p66)
20. **eTable 20:** Reported and estimated dietary intakes of trans fatty acids in cohort studies, according to quantile. (p70)

**eTable 1. Summary of measurement techniques of industrial, total, and ruminant TFA in prospective cohort studies.**

**3-Star Prospective Cohorts**

| Study                                   | Total TFA                         | Ruminant TFA | Industrial TFA | Isomers      | CLA included | Tissues |                                | Cross-validation | Database                                                                                                                                                                                          | Rating |
|-----------------------------------------|-----------------------------------|--------------|----------------|--------------|--------------|---------|--------------------------------|------------------|---------------------------------------------------------------------------------------------------------------------------------------------------------------------------------------------------|--------|
|                                         |                                   |              |                |              |              | Blood   | Adipose                        |                  |                                                                                                                                                                                                   |        |
| Ascherio et al., 1996<br>[131-item FFQ] | Yes and validated against adipose | Not measured | Not measured   | Not reported | Unclear      | No      | Yes<br><br>Hunter et al., 1992 | Yes              | Harvard University Food Composition Database (updated over time using USDA) supplemented by Slover et al. 1985; and Enig et al 1983 (two publications that tested trans fat composition of foods) | ★★★    |

| Study                                            | Total TFA | Ruminant TFA | Industrial TFA | Isomers | CLA included | Tissues |                                | Cross-validation                                                                  | Database                                                                                                                                  | Rating |
|--------------------------------------------------|-----------|--------------|----------------|---------|--------------|---------|--------------------------------|-----------------------------------------------------------------------------------|-------------------------------------------------------------------------------------------------------------------------------------------|--------|
|                                                  |           |              |                |         |              | Blood   | Adipose                        |                                                                                   |                                                                                                                                           |        |
| Oh et al., 2005<br><br>NHS<br><br>[131-item FFQ] | Yes       | No           | No             | No      | Unclear      | No      | Yes<br><br>London et al., 1991 | Yes<br><br>Willett et al, 1985 not specifically for trans fats (0.51 vs. adipose) | USDA handbook no. 8 supplemented by Slover et al. 1985; and Enig et al 1983 (two publications that tested trans fat composition of foods) | ★★★    |
| Salmeron et al., 2001                            | Yes       | No           | No             | No      | Unclear      | No      | Yes<br><br>London et al., 1991 | Yes<br><br>Willett et al, 1985 not specifically for trans fats (0.51 vs. adipose) | USDA handbook no. 8 supplemented by Slover et al. 1985; and Enig et al 1983 (two publications that tested trans fat composition of foods) | ★★★    |

| Study                       | Total TFA                         | Ruminant TFA | Industrial TFA | Isomers      | CLA included | Tissues |                                | Cross-validation | Database                                                                                                                                                                                          | Rating |
|-----------------------------|-----------------------------------|--------------|----------------|--------------|--------------|---------|--------------------------------|------------------|---------------------------------------------------------------------------------------------------------------------------------------------------------------------------------------------------|--------|
|                             |                                   |              |                |              |              | Blood   | Adipose                        |                  |                                                                                                                                                                                                   |        |
| He et al., 2003<br>HPFS     | Yes                               | No           | No             | No           | Unclear      | No      | Yes<br><br>Hunter et al., 1992 | Yes              | Harvard University Food Composition Database (updated over time using USDA) supplemented by Slover et al. 1985; and Enig et al 1983 (two publications that tested trans fat composition of foods) | ★★★    |
| Van Dam et al, 2002<br>HPFS | Yes and validated against adipose | Not measured | Not measured   | Not reported | Unclear      | No      | Yes<br><br>Hunter et al., 1992 | Yes              | Harvard University Food Composition Database (updated over time using USDA) supplemented by Slover et al. 1985; and Enig et al 1983 (two publications that tested trans fat composition of foods) | ★★★    |

| Study                           | Total TFA | Ruminant TFA | Industrial TFA | Isomers      | CLA included | Tissues |                                | Cross-validation                                               | Database                                                                                                                                                                                          | Rating |
|---------------------------------|-----------|--------------|----------------|--------------|--------------|---------|--------------------------------|----------------------------------------------------------------|---------------------------------------------------------------------------------------------------------------------------------------------------------------------------------------------------|--------|
|                                 |           |              |                |              |              | Blood   | Adipose                        |                                                                |                                                                                                                                                                                                   |        |
| Song, 2004<br><br>WHS           | Yes       | Not measured | Not measured   | Not reported | Unclear      | No      | Yes<br><br>Hunter et al., 1992 | Yes                                                            | Harvard University Food Composition Database (updated over time using USDA) supplemented by Slover et al. 1985; and Enig et al 1983 (two publications that tested trans fat composition of foods) | ★★★    |
| Willett et al., 1993<br><br>NHS | Yes       | Yes          | Yes            | No           | Unsure       | No      | Yes<br><br>London et al., 1991 | Yes<br><br>Willett et al, 1985 not specifically for trans fats | USDA handbook no. 8 supplemented by Slover et al. 1985; and Enig et al 1983 (two publications that tested trans fat composition of foods)                                                         | ★★★    |
| Wang et al., 2015<br><br>CHS    | Yes       | Yes          | Yes            | Yes          | Unsure       | Yes     | No                             | Yes<br><br>Kumanyika et al. 1997; Feskanich et al., 1993       | Harvard University Food Composition Database (updated over time using USDA)                                                                                                                       | ★★★    |

**2-Star Prospective Cohorts**

| Study                                                                  | Total TFA | Ruminant TFA | Industrial TFA | Isomers         | CLA included | Tissues |         | Cross-validation                                                | Database                                                                                                                                                                          | Rating |
|------------------------------------------------------------------------|-----------|--------------|----------------|-----------------|--------------|---------|---------|-----------------------------------------------------------------|-----------------------------------------------------------------------------------------------------------------------------------------------------------------------------------|--------|
|                                                                        |           |              |                |                 |              | Blood   | Adipose |                                                                 |                                                                                                                                                                                   |        |
| Oomen et al., 2001<br>[cross-check diet history]<br><br>Zutphen Elders | Yes       | No           | Yes            | 18:1 and others | No           | No      | No      | Yes, Bloemberg et al. 1989 (but not specifically trans)         | TRANSFAIR 1995; Dutch food tables; national data for edible fats analyzed by Wageningen U (1985, 1990, 1995) using GC or I-R spec.                                                | ★★     |
| Jakobsen 2007<br><br>4 Danish cohorts                                  | No        | Yes          | No             | No              | Unclear      | No      | No      | Yes<br><br>Hoidrup et al. 2002; not specifically for trans fats | R-TFA achieved by combining information on food intake with content of TFA in milk fat and the content of TFA in ruminant animal products; using Denmark Food Tables (1986, 1989) | ★★     |
| Virtanen et al., 2014<br><br>KIHD                                      | Yes       | Not measured | Not measured   | Not reported    | No           | No      | No      | Yes (0.63 vs. 4-day food record in n=50)                        | Finnish values of composition of foods                                                                                                                                            | ★★     |

**1-Star Prospective Cohorts**

| Study                                             | Total TFA                    | Ruminant TFA                 | Industrial TFA               | Isomers                             | CLA included | Tissues |         | Cross-validation                                                                                            | Database                            | Rating |
|---------------------------------------------------|------------------------------|------------------------------|------------------------------|-------------------------------------|--------------|---------|---------|-------------------------------------------------------------------------------------------------------------|-------------------------------------|--------|
|                                                   |                              |                              |                              |                                     |              | Blood   | Adipose | Diet records                                                                                                |                                     |        |
| Pietinen et al., 1997<br>[276-item FFQ]<br>(ATBC) | Yes and validated against DR | Yes and validated against DR | Yes and validated against DR | Elaidic<br><br>Validated against DR | Unclear      | No      | No      | Yes<br><br>Pietinen et al., 1988 (but not specifically trans) but r-value for trans given in 1997 paper     | Not stated                          | ★      |
| Meyer et al., 2001<br><br>IWHS                    | Yes                          | No                           | No                           | No                                  | Unclear      | No      | No      | Yes<br><br>Munger et al., 1992 (with 5x24h recalls) but not specifically for trans fats                     | Not stated                          | ★      |
| Robien et al., 2011<br><br>IWHS                   | Yes                          | No                           | No                           | No                                  | Unclear      | No      | No      | Yes<br><br>Vs. 5 x 24-h dietary recall surveys; not specifically trans                                      | Not stated                          | ★      |
| Howard et al., 2006<br><br>WHI                    | Yes                          | No                           | No                           | No                                  | Unclear      | No      | No      | Yes, Patterson et al., 1999 vs. 24h-recalls (x4) and food records (4 d) but not specifically for trans fats | U Minnesota Nutrition coding center | ★      |



| Study                       | Total TFA | Ruminant TFA | Industrial TFA | Isomers      | CLA included | Tissues |         | Cross-validation                                                                                        | Database   | Rating |
|-----------------------------|-----------|--------------|----------------|--------------|--------------|---------|---------|---------------------------------------------------------------------------------------------------------|------------|--------|
|                             |           |              |                |              |              | Blood   | Adipose | Diet records                                                                                            |            |        |
| Simila et al., 2012<br>ATBC | Yes       | Not measured | Not measured   | Not reported | Unclear      | No      | No      | Yes<br><br>Pietinen et al., 1988 (but not specifically trans) but r-value for trans given in 1997 paper | Not stated | ★      |
| Meyer et al., 2001<br>IWHS  | Yes       | No           | No             | No           | Unclear      | No      | No      | Yes<br><br>Munger et al., 1992 (with 5x24h recalls) but not specifically for trans fats                 | Not stated | ★      |

## 0-Star Prospective Cohorts

| Study                                              | Total TFA | Ruminant TFA | Industrial TFA | Isomers | CLA included | Tissues |         | Cross-validation                    | Database                                      | Rating |
|----------------------------------------------------|-----------|--------------|----------------|---------|--------------|---------|---------|-------------------------------------|-----------------------------------------------|--------|
|                                                    |           |              |                |         |              | Blood   | Adipose | Diet records                        |                                               |        |
| Xu et al., 2006 [24h recall]<br>Strong Heart Study | Yes       | No           | No             | No      | Unclear      | No      | No      | No; only single 24-h recall         | NCC Nutrient Database Version 36 (NDS-R 2005) | -      |
| Knekt et al., 2013<br>FMHC                         | Yes       | No           | No             | No      | Unclear      | No      | No      | Short and long-term reproducibility | Unclear                                       | -      |

### Guide to star Rating

- ★★★ Validated, Reproducible FFQ (cross-validated) + Measures in adipose tissue or blood + Updated nutrient database
- ★★ 2 of the above
- ★ 1 of the above
- None of the above

### **Assessment of *trans* fat measures**

To assess the accuracy of trans fats measures in studies which did not directly measure concentrations in blood or adipose tissues, we assessed the potential for misclassification. The lowest risk of misclassification was for those studies which 1) used a food-frequency questionnaire validated against multiple-day prospective diet records or 24-hour recalls; and 2) directly measured adipose tissue trans-fatty acids in a subset of the population; and 3) analyzed dietary intake using an updated database of foods. A study which accomplished all 3 was rated \*\*\* (low risk of misclassification); 2 of 3 \*\* (moderate risk of misclassification); 1 of 3 \* (at risk of misclassification); or 0 of 3 – (high risk of misclassification). For assessment of ruminant trans fats, the most common approach was to use the known nutrient composition from food tables for dairy and meat products to estimate ruminant trans fats, and possibly supplemented by direct measurement using gas chromatography.

**eTable 2.** Characteristics of included prospective cohort studies of saturated fatty acids and health outcomes. (FA=fatty acids; DM=diabetes mellitus; CVD=cardiovascular disease; BMI=body mass index; MI=myocardial infarction; CHD=coronary heart disease; BP=blood pressure; ECG=electrocardiogram)

| Source (Country)                                                               | Age (years) | Sex (% Men) | Number of Participants | Number of Events                   | Follow-up (years) | Exposures Assessed                          | Exposure Contrast                                        | Outcome validation                                                                                                                                                                                                                                                                                                                                                                         | Adjustment for confounders                                                                                                                                                                                                                                                                                       | NOS Score | Funding                                                     |
|--------------------------------------------------------------------------------|-------------|-------------|------------------------|------------------------------------|-------------------|---------------------------------------------|----------------------------------------------------------|--------------------------------------------------------------------------------------------------------------------------------------------------------------------------------------------------------------------------------------------------------------------------------------------------------------------------------------------------------------------------------------------|------------------------------------------------------------------------------------------------------------------------------------------------------------------------------------------------------------------------------------------------------------------------------------------------------------------|-----------|-------------------------------------------------------------|
| Ascherio et al. 1996<br>United States<br>Health Professionals' Follow-up Study | 40-75       | 100         | 43 757                 | 734 Total MI<br>229 CHD Deaths     | 6                 | Mean Saturated Fat Intake (validated FFQ)   | Q5 vs. Q1 (14.8 to 7.2% E)                               | Events were self reported and confirmed by medical record review. Deaths confirmed by next of kin, co-workers, postal authorities or the National Death Index.                                                                                                                                                                                                                             | Age, energy, BMI, smoking habits, alcohol consumption, physical activity, history of hypertension or high blood cholesterol, family history of MI <60-years, profession, dietary fibre                                                                                                                           | 9         | National Institutes of Health (USA)                         |
| Atkinson et al. 2011<br>United Kingdom<br>Caerphilly Prospective Study (CaPS)  | 45-59       | 100         | 3 265                  | 225 Strokes                        | 22                | Saturated Fat Intake (validated SQFFQ)      | Q5 vs. Q1 (not reported)                                 | Events were self reported, and supplemented by inspection of hospital and general practitioner notes, radiology records and post-mortem reports, and by further questioning of study participants of close relatives. Two independent experts confirmed the final diagnosis.                                                                                                               | Age, total energy, smoking status, adult social class, marital status, alcohol intake, vitamin C intake, vegetable fibre intake, blood pressure, cholesterol, BMI, fasting glucose, diabetes, atrial fibrillation, childhood social class, existing ischemic heart disease                                       | 8         | National Health Service Executive (UK)                      |
| Boniface et al. 2002<br>United Kingdom                                         | 40-75       | 46          | 2 676                  | 155 CHD Deaths                     | 16                | Mean Saturated Fat Intake (validated FFQ)   | Q5 vs. Q1 (Men: 8.2 to 7.4% E)<br>(Women: 5.8 to 2.4% E) | Monitoring of death certificates by the Office for National Statistics                                                                                                                                                                                                                                                                                                                     | Age, alcohol consumption, smoking habits, frequency of exercise, BMI, blood pressure, social class, deprivation index                                                                                                                                                                                            | 7         | UK Higher Education Funding Council (UK)                    |
| de Oliveira et al. 2012<br>United States<br>MESA Cohort                        | 45-84       | ~ 50        | 5 209                  | 316 Cases of CVD<br>231 CHD Events | 10                | Median Saturated Fat Intake (validated FFQ) | Q5 vs. Q1 (25.30 to 12.20-g/day)                         | Cardiovascular incidence data was obtained through cohort examinations, follow-up calls, medical record abstractions, or obituaries. Self-reported diagnoses and CVD-related records (death certificates, autopsy reports, and medical records) were reviewed by a medical endpoints committee and deaths for subjects with loss to follow-up was identified by contacting family members. | Energy intake, sex, age, race-ethnicity, field center, education level, active leisure, sedentary leisure, alcohol intake, smoking, BMI, dietary supplement use, cholesterol-lowering medication use, intake of fruits and vegetables, and energy-adjusted intakes of: dietary fibre, vitamin E, trans fat, PUFA | 9         | University of Texas, Research Institute of Texas, NIH (USA) |

**eTable 2.** Characteristics of included prospective cohort studies of saturated fatty acids and health outcomes. (FA=fatty acids; DM=diabetes mellitus; CVD=cardiovascular disease; BMI=body mass index; MI=myocardial infarction; CHD=coronary heart disease; BP=blood pressure; ECG=electrocardiogram)

| Source (Country)                                                                                       | Age (years) | Sex (% Men)                    | Number of Participants | Number of Events               | Follow-up (years) | Exposures Assessed                                                                     | Exposure Contrast              | Outcome validation                                                                                                                                                     | Adjustment for confounders                                                                                                           | NOS Score | Funding                                                                                                                                                                                                                            |
|--------------------------------------------------------------------------------------------------------|-------------|--------------------------------|------------------------|--------------------------------|-------------------|----------------------------------------------------------------------------------------|--------------------------------|------------------------------------------------------------------------------------------------------------------------------------------------------------------------|--------------------------------------------------------------------------------------------------------------------------------------|-----------|------------------------------------------------------------------------------------------------------------------------------------------------------------------------------------------------------------------------------------|
| Esrey et al. 1996<br>Canada<br>Lipid Research Clinics                                                  | 30-79       | 45 (age 30-59); 53 (age 60-79) | 4546                   | 92 CHD death                   | 12                | Total saturated fat (24-hour recall)                                                   | 1% increase in SFA intake      | Medical record review by independent nosologist                                                                                                                        | Age, sex, energy intake, serum lipids, SBP, smoking, BMI, glucose intolerance                                                        | 6         | Dairy Bureau of Canada, Health and Welfare Canada                                                                                                                                                                                  |
| Fehily et al. 1993<br>United Kingdom<br>Caerphilly Prospective Ischemic Heart Disease Study            | 45-59       | 100                            | 2512                   | 148 major IHD events           | 5                 | Mean saturated fat intake (7d + validated SQFFQ)                                       | Q5 vs. Q1 (>36.2 to ≤22.3 % E) | Chest pain questionnaire, electrocardiogram, notifications of death from the Office of Population Censuses and Surveys, hospital notes                                 | Age, BMI, smoking habit, presence of IHD at baseline                                                                                 | 7         | Not Provided                                                                                                                                                                                                                       |
| Gillman et al. 1997<br>United States<br>Framingham Heart Study                                         | 45-65       | 100                            | 832                    | 61 Ischemic Strokes            | 20                | Total Saturated Fatty Acid Intake Intake of Saturated Fat (24h recall)                 | ≈15% E                         | Reviewed by panel of 3 physician investigators                                                                                                                         | Age, energy, SBP, smoking, glucose intolerance, BMI, physical activity, LVH, alcohol, fruits and vegetables                          | 7         | National Heart, Lung, and Blood Institute (USA)                                                                                                                                                                                    |
| Goldbourt et al. 1993<br>Israel                                                                        | 40+         | Not provided                   | 11 876                 | 3473 deaths (1098 CHD deaths)  | 23                | Total saturated fat intake (validated short dietary questionnaire for 7-d diet recall) | Q5 vs. Q1 (49/161 to 61/192)   | Evaluation of death certificates by research panel, autopsies                                                                                                          | Age, presence of initial malignant disease,                                                                                          | 7         | Not provided                                                                                                                                                                                                                       |
| Harding et al. 2004<br>United Kingdom<br>European Prospective Investigation of Cancer (EPIC) - Norfolk | 40-74       | Not provided                   | 23 631                 | 414 incident cases of diabetes | 3-7               | Total saturated fat intake (validated SQFFQ)                                           | Q5 vs. Q1 (16.2 to 9.72 g/day) | Self-report of diabetes, physician-diagnosed diabetes, consumption of diabetes-specific medications, elevated HbA1c level, hospital admissions data, death certificate | Age, total energy intake, sex, family history of diabetes, smoking status, physical activity, protein, alcohol, BMI, waist:hip ratio | 8         | Cancer research campaign, MRC, Stroke Association, British Heart Foundation, Department of Health, Commission of the European Union's Europe against Cancer Programme, Department for Environment, Food and Rural Affairs (Europe) |

**eTable 2.** Characteristics of included prospective cohort studies of saturated fatty acids and health outcomes. (FA=fatty acids; DM=diabetes mellitus; CVD=cardiovascular disease; BMI=body mass index; MI=myocardial infarction; CHD=coronary heart disease; BP=blood pressure; ECG=electrocardiogram)

| Source (Country)                                                                                                              | Age (years) | Sex (% Men) | Number of Participants | Number of Events                                                           | Follow-up (years) | Exposures Assessed                                           | Exposure Contrast                                   | Outcome validation                                                                                                                                                                                 | Adjustment for confounders                                                                                                                                                                                                                                                                                                 | NOS Score | Funding                                                    |
|-------------------------------------------------------------------------------------------------------------------------------|-------------|-------------|------------------------|----------------------------------------------------------------------------|-------------------|--------------------------------------------------------------|-----------------------------------------------------|----------------------------------------------------------------------------------------------------------------------------------------------------------------------------------------------------|----------------------------------------------------------------------------------------------------------------------------------------------------------------------------------------------------------------------------------------------------------------------------------------------------------------------------|-----------|------------------------------------------------------------|
| He et al. 2003<br>United States<br>Health<br>Professionals'<br>Follow-up Study                                                | 40-75       | 100         | 43 732                 | 725 total stroke;<br>455 ischemic<br>stroke, 125<br>haemorrhagic<br>stroke | 14                | Median<br>intake of<br>saturated fat<br>(validate<br>SQFFQ)  | Q5 vs. Q1<br>(31 to 17<br>g/day)                    | Blind record review by MD;<br>fatal stroke reported by next<br>of kin corroborated against<br>national death index                                                                                 | BMI, physical activity, history of<br>hypertension, smoking status, aspirin use,<br>alcohol, dietary potassium, dietary fiber,<br>dietary vitamin E, fruits and vegetables, total<br>energy intake, hypercholesterolemia at<br>baseline, polyunsaturated,<br>monounsaturated, and saturated fat                            | 7         | National<br>Institutes of<br>Health<br>(USA)               |
| Howard et al. 2006<br>United States<br>Womens' Health<br>Initiative<br>Randomized<br>Controlled Dietary<br>Modification Trial | 50-79       | 0           | 31 258                 | 146 major CHD<br>events                                                    | 1                 | Total<br>saturated fat<br>intake<br>(validated<br>FFQ)       | Intervention<br>vs. Control<br>(8.1 to 11.8<br>% E) | Medical update<br>questionnaire, analysis of<br>medical records of all<br>overnight hospitalisations,<br>analyzed by physicians                                                                    | Age, baseline CHD, HRT, randomization, BMI,<br>hypertension, dyslipidemia, smoking,<br>diabetes, physical activity, energy<br>expenditure, ethnicity, education, income,<br>psychological stress                                                                                                                           | 8         | National<br>Heart, Lung<br>and Blood<br>Institute<br>(USA) |
| Hu et al. 1997<br>United States<br>Nurses' Health<br>Study                                                                    | 34-59       | 0           | 80 082                 | 939 events (658<br>non-fatal MI, 281<br>deaths)                            | 14                | Total intake<br>of saturated<br>fats<br>(validated<br>SQFFQ) | Q5 vs. Q1<br>(18.8 to 10.7<br>% E)                  | Review of medical records by<br>study physicians, interviews<br>and letters for confirmation<br>of hospitalization. Death<br>confirmed by National Death<br>Index, next of kin or postal<br>system | Age, time period, BMI, smoking, menopausal<br>status, parental history of MI before 65<br>years, multivitamin use, vitamin E<br>supplementation, alcohol consumption,<br>history of hypertension, aspirin use, vigorous<br>exercise, percent energy from protein, total<br>energy intake, dietary cholesterol              | 9         | National<br>Institute of<br>Health<br>(USA)                |
| Hu et al. 1999<br>United States<br>Nurses' Health<br>Study                                                                    | 34-59       | 0           | 80 082                 | 939 incidence<br>cases of major<br>CHD                                     | 14                | Median<br>saturated fat<br>intake<br>(validated<br>FFQ)      | Q5 vs. Q1<br>(17.2 to 9.5<br>% E)                   | Review of medical records by<br>study physicians, interviews<br>and letters for confirmation<br>of hospitalization. Death<br>confirmed by National Death<br>Index, next of kin or postal<br>system | Age, time period, BMI, smoking, menopausal<br>status, parental history of MI before 60<br>years, vitamin E supplement use, alcohol<br>consumption, history of hypertension,<br>aspirin use, vigorous exercise,<br>monounsaturated fats, polyunsaturated fats,<br>trans fats, protein, dietary cholesterol, total<br>energy | 9         | National<br>Institute of<br>Health<br>(USA)                |

**eTable 2.** Characteristics of included prospective cohort studies of saturated fatty acids and health outcomes. (FA=fatty acids; DM=diabetes mellitus; CVD=cardiovascular disease; BMI=body mass index; MI=myocardial infarction; CHD=coronary heart disease; BP=blood pressure; ECG=electrocardiogram)

| Source (Country)                                                                | Age (years) | Sex (% Men) | Number of Participants | Number of Events                  | Follow-up (years) | Exposures Assessed                                                               | Exposure Contrast                                   | Outcome validation                                                                                                                    | Adjustment for confounders                                                                                                                                                                                                                                                  | NOS Score | Funding                                                                  |
|---------------------------------------------------------------------------------|-------------|-------------|------------------------|-----------------------------------|-------------------|----------------------------------------------------------------------------------|-----------------------------------------------------|---------------------------------------------------------------------------------------------------------------------------------------|-----------------------------------------------------------------------------------------------------------------------------------------------------------------------------------------------------------------------------------------------------------------------------|-----------|--------------------------------------------------------------------------|
| Jakobsen et al. 2004<br>Denmark<br>1914 & 1936 cohorts,<br>MONICA I, MONICA III | 30-71       | 50          | 3 686                  | 326 fatal or non-fatal CHD events | 16                | Percent energy intake from Saturated fats (validated 7-day weighted food record) | Men: 24.8 vs. 14.5<br>Women: 24.8 vs. 14.1          | Identified by record linkage to the National Patient Registry (includes references for all hospitalizations), Cause of Death Registry | Energy intake, cohort identification, % energy derived from protein or other major types of fatty acids, familial history of MI, smoking, physical activity, educational attainment, alcohol consumption, dietary fibre, dietary cholesterol, systolic blood pressure, BMI, | 8         | Danish Heart Foundation, Danish Medical Research Council (Denmark)       |
| Jakobsen et al. 2010<br>Denmark<br>Diet, Cancer and Health Cohort Study         | 50-64       | 47          | 53 644                 | 1943 incident MI                  | 12                | Mean saturated fat intake (validated SQFFQ)                                      | Increased in HR for MI with each 5% increase in SFA | Identified by record linkage to the National Patient Registry (includes references for all hospitalizations), Cause of Death Registry | Glycemic carbohydrates, proteins, MUFA & PUFA (as % of total energy intake), total energy intake, alcohol consumption, BMI, education, smoking status, physical activity, history of hypertension                                                                           | 7         | European Commission, Danish Council for Strategic Research (EU, Denmark) |

**eTable 2.** Characteristics of included prospective cohort studies of saturated fatty acids and health outcomes. (FA=fatty acids; DM=diabetes mellitus; CVD=cardiovascular disease; BMI=body mass index; MI=myocardial infarction; CHD=coronary heart disease; BP=blood pressure; ECG=electrocardiogram)

| Source (Country)                                                | Age (years) | Sex (% Men) | Number of Participants | Number of Events                                | Follow-up (years) | Exposures Assessed                              | Exposure Contrast                                           | Outcome validation            | Adjustment for confounders                                                                                                                                                                             | NOS Score | Funding                                                                                                                                                                        |
|-----------------------------------------------------------------|-------------|-------------|------------------------|-------------------------------------------------|-------------------|-------------------------------------------------|-------------------------------------------------------------|-------------------------------|--------------------------------------------------------------------------------------------------------------------------------------------------------------------------------------------------------|-----------|--------------------------------------------------------------------------------------------------------------------------------------------------------------------------------|
| Leosdottir et al. 2007<br>Sweden<br>Malmo Diet and Cancer Study | ≈59         | 39          | 28 098                 | 908 acute coronary events; 648 ischemic strokes | 8.4               | Total saturated fatty acids (7-day diary + FFQ) | M: 20.9 vs 12.7%<br>W: 21.3 vs 12.8%                        | Local and national registries | Age, smoking, alcohol, SES, marital status, physical activity, BMI, fiber, blood pressure                                                                                                              | 7         | Swedish Scientific Council; Swedish Cancer Foundation ; Anna Jonssons Memorial Fund; Swedish Heart and Lung Foundation , Region of Skåne (Sweden) European Commission (Europe) |
| Leosdottir et al. 2005<br>Sweden<br>Malmo Diet and Cancer Study | ≈59         | 39          | 28 098                 | 1250 deaths (339 from CVD)                      | 6.6               | Total saturated fatty acids (7-day diary + FFQ) | Q4 vs. Q1<br>(M: 44.6 to 40.1 % E)<br>(F: 45.3 to 41.2 % E) | Local and national registries | Age, alcohol, smoking, social class, marital status, physical activity, BMI, fibre intake, monounsaturated and polyunsaturated fats, total fat intake for ratio between unsaturated and saturated fats | 7         | Swedish Scientific Council; Swedish Cancer Foundation; Anna Jonssons Memorial Fund; Swedish Heart and Lung Foundation, Region of Skåne (Sweden) European Commission (Europe)   |

**eTable 2.** Characteristics of included prospective cohort studies of saturated fatty acids and health outcomes. (FA=fatty acids; DM=diabetes mellitus; CVD=cardiovascular disease; BMI=body mass index; MI=myocardial infarction; CHD=coronary heart disease; BP=blood pressure; ECG=electrocardiogram)

| Source (Country)                                                | Age (years) | Sex (% Men) | Number of Participants | Number of Events                                                | Follow-up (years) | Exposures Assessed                                     | Exposure Contrast                                                  | Outcome validation                                                                               | Adjustment for confounders                                                                                                                                                                                                                                                   | NOS Score | Funding                                                                                                                                                                                         |
|-----------------------------------------------------------------|-------------|-------------|------------------------|-----------------------------------------------------------------|-------------------|--------------------------------------------------------|--------------------------------------------------------------------|--------------------------------------------------------------------------------------------------|------------------------------------------------------------------------------------------------------------------------------------------------------------------------------------------------------------------------------------------------------------------------------|-----------|-------------------------------------------------------------------------------------------------------------------------------------------------------------------------------------------------|
| Lindstrom et al. 2006<br>Finland<br>Diabetes Prevention Study   | 55          | 33          | 522                    | Incident cases of diabetes (75 in intervention, 110 in control) | 7                 | Reductions in saturated fats to <10% energy            | Intervention: 13% E<br>Control: 15% E, proportion of saturated fat | Diagnosis with diabetes based on a second oral glucose tolerance test                            | Adjustment for baseline level, levels at last visit, treatment group, study centre, sex, age, and baseline 2-h post-challenge plasma glucose concentration                                                                                                                   | 5         | Academy of Finland, Joho Vainio Foundation, Ministry of Education, Novo Nordisk Foundation, Yrjo Jahnsson Foundation, Finnish Diabetes Research Foundation, Kuopio and Oulu Hospitals (Finland) |
| Mann et al. 1997<br>United Kingdom                              | 16-79       | 38          | 10 802                 | 456 deaths (64 IHD, 392 all cause mortality)                    | 13.3              | Total saturated fat intake (SQFFQ)                     | Q3 vs. Q1<br>(M: 41 to 14.6 g/day)<br>(F: 38.1 to 13.7 g/day)      | Review of death certificates                                                                     | Age, sex, smoking habit, social class                                                                                                                                                                                                                                        | 6         | Not stated                                                                                                                                                                                      |
| McGee et al. 1985<br>United States<br>Honolulu Heart Program    | 45-60+      | 100         | 7 088                  | 542 total deaths; 61 stroke deaths; 99 CHD deaths               | 10                | Total saturated fat (24-hour recall)                   | ≥50 g vs. <10 g, but also continuous                               | Physician panel review                                                                           | Age, SBP, BMI, physical activity, cigarettes smoked                                                                                                                                                                                                                          | 6         | Not stated                                                                                                                                                                                      |
| Meyer et al. 2001<br>United States<br>Iowa Women's Health Study | 55-69       | 0           | 35 988                 | 1890 incident cases of diabetes                                 | 11                | Median intake of saturated fatty acids (validated FFQ) | Q5 vs. Q1<br>(86.6 to 55.7 g/day)                                  | Survey asking if participant had been diagnosed with diabetes by a physician, for the first time | Age, total energy, waist-to-hip ratio, BMI, physical activity, smoking, alcohol consumption, education, marital status, residential area, hormone replacement, fat subtypes, dietary protein, dietary magnesium, cereal fibre, vitamin E, vegetable fat, dietary cholesterol | 6         | National Cancer Institute (USA)                                                                                                                                                                 |



**eTable 2.** Characteristics of included prospective cohort studies of saturated fatty acids and health outcomes. (FA=fatty acids; DM=diabetes mellitus; CVD=cardiovascular disease; BMI=body mass index; MI=myocardial infarction; CHD=coronary heart disease; BP=blood pressure; ECG=electrocardiogram)

| Source (Country)                                                                                  | Age (years) | Sex (% Men) | Number of Participants | Number of Events                                                     | Follow-up (years) | Exposures Assessed                                       | Exposure Contrast                                          | Outcome validation                                                                                                                                                                                                                                                        | Adjustment for confounders                                                                                                                                                                                                                                                                                                                                                          | NOS Score | Funding                                             |
|---------------------------------------------------------------------------------------------------|-------------|-------------|------------------------|----------------------------------------------------------------------|-------------------|----------------------------------------------------------|------------------------------------------------------------|---------------------------------------------------------------------------------------------------------------------------------------------------------------------------------------------------------------------------------------------------------------------------|-------------------------------------------------------------------------------------------------------------------------------------------------------------------------------------------------------------------------------------------------------------------------------------------------------------------------------------------------------------------------------------|-----------|-----------------------------------------------------|
| Oh et al. 2005<br>United States<br>Nurses' Health<br>Study                                        | 30-55       | 0           | 78 778                 | 1766 incident cases of CHD (1241 non-fatal MI, 525 CHD deaths)       | 20                | Total saturated fatty acids (validated FFQ)              | Q5 vs. Q1 (17.6 to 10.1 median % energy)                   | Self-reported non-fatal MI, confirmed with review of medical records. Fatal CHD was confirmed by hospital records or autopsy or if CHD was listed as cause of death on the death certificate.                                                                             | Age, BMI, smoking, alcohol intake, parental history of MI, history of hypertension, menopausal status, hormone use, aspirin use, multivitamin use, vitamin E supplement use, physical activity, energy, protein, cholesterol, intakes of monounsaturated, polyunsaturated, <i>trans</i> -fat, $\alpha$ -linoleic acid, marine n-3 fatty acids, cereal fibre, fruits and vegetables. | 9         | National Institutes of Health (US)                  |
| Pietinen et al. 1997<br>Finland<br>Finish Alpha-Tocopherol, Beta-Carotene Cancer Prevention Study | 50-69       | 100         | 21 930                 | 1399 major coronary events (first non-fatal MI), 635 coronary deaths | 6                 | Median saturated fatty acid intake (validated FFQ)       | Q5 vs Q1 (67.5 to 34.7-g/day)                              | National hospital discharge registered diagnosis and obtained hospital and pathology reports; deaths confirmed through national population register                                                                                                                       | Age, treatment group, smoking, BMI, blood pressure, energy, alcohol, fibre, education, physical activity                                                                                                                                                                                                                                                                            | 8         | National Cancer Institute (USA), Academy of Finland |
| Posner et al. 1991<br>United States<br>Framingham<br>Study                                        | 45-65       | 100         | 813                    | 213 CHD                                                              | 16                | Total saturated fatty acid intake (24h recall)           | 15.2 vs. 10% SFA (age 45-55), 14.8 vs. 10% SFA (age 56-65) | Reviewed by a panel of three investigators. Clinical examinations were used to diagnose MI                                                                                                                                                                                | Total energy intake, heart rate, systolic blood pressure, serum total cholesterol level, glucose intolerance, number of cigarettes smoked per day, left ventricular hypertrophy, physical activity, Metropolitan relative weight                                                                                                                                                    | 8         | National Heart, Lung, and Blood Institute (USA)     |
| Salmeron et al. 2001<br>United States<br>Nurses' Health<br>Study                                  | 34-59       | 0           | 84 204                 | 2507 incident cases of T2DM                                          | 14                | Median intake of saturated fatty acids (validated SQFFQ) | Q5 vs. Q1 (18.8 to 10.7 %E)                                | Follow-up questionnaire asking for incident cases of diabetes, supplementary questionnaire for new cases and confirmed by review of medical records. Deaths identified from state vital records, National Death Index, or were reported by next of kin, and postal system | Age, BMI, time period, smoking, parental history of diabetes, alcohol consumption, physical activity, percentage of energy from protein, total energy intake, dietary cholesterol                                                                                                                                                                                                   | 9         | National Institutes of Health (USA)                 |

**eTable 2.** Characteristics of included prospective cohort studies of saturated fatty acids and health outcomes. (FA=fatty acids; DM=diabetes mellitus; CVD=cardiovascular disease; BMI=body mass index; MI=myocardial infarction; CHD=coronary heart disease; BP=blood pressure; ECG=electrocardiogram)

| Source (Country)                                                                                | Age (years) | Sex (% Men) | Number of Participants | Number of Events                               | Follow-up (years) | Exposures Assessed                                    | Exposure Contrast              | Outcome validation                                                                                                                 | Adjustment for confounders                                                                                                                                                                                                                  | NOS Score | Funding                                                                                                                         |
|-------------------------------------------------------------------------------------------------|-------------|-------------|------------------------|------------------------------------------------|-------------------|-------------------------------------------------------|--------------------------------|------------------------------------------------------------------------------------------------------------------------------------|---------------------------------------------------------------------------------------------------------------------------------------------------------------------------------------------------------------------------------------------|-----------|---------------------------------------------------------------------------------------------------------------------------------|
| Sauvagat et al. 2004<br>Japan<br>Adult Health Study<br>(subcohort of the Life Span Study)       | 35-89       | 38          | 3731                   | 90 stroke deaths (60 from cerebral infarction) | 14                | Mean saturated fatty acid intake (24h dietary recall) | Q3 vs Q1 (21 to 7 g/day)       | Events were determined by analysis of nationwide family registration system of Japan and by obtaining copies of death certificates | Radiation dose, city of exposure, smoking and drinking status, BMI, history of hypertension and diabetes, fruit and vegetable intake, markers of nutritional status, lymphocyte count, blood cholesterol level, total energy intake, weight | 5         | Radiation Effects Research Foundation, Japanese Ministry of Health, Labour and Welfare (Japan)<br>US Department of Energy (USA) |
| Simila et al. 2012<br>Finland<br>Finish Alpha-Tocopherol, Beta-Carotene Cancer Prevention Study | 50-69       | 100         | 25 943                 | 1098 incident diabetes cases                   | 12                | Median saturated fat intake (validated FFQ)           | Q1 vs. Q5 (44.8 to 36.1 % E)   | Incident cases of diabetes were identified from the drug reimbursement register                                                    | Age, energy, intervention group, BMI, smoking, physical activity, coffee consumption, alcohol, protein (replacement of fat) and vice versa, other macronutrient subgroups (TFA, MUFA, PUFA)                                                 | 8         | US Public Health Service contracts, National Cancer Institute (USA)<br>Academy of Finland                                       |
| Song et al. 2004<br>United States<br>Women's Health Study                                       | ≥45         | 0           | 37 309                 | 1558 incident cases of T2DM                    | 8.8               | Median saturated fat intake (validated SQFFQ)         | Q5 vs. Q1 (25.8 to 13.8 g/day) | Annual follow-up to determine new diagnoses of T2DM, supplemental questionnaire, contact with primary care physician.              | Age, BMI, total energy intake, smoking, exercise, alcohol use, family history of diabetes, fibre intake, glycemic load, magnesium, total fat                                                                                                | 7         | National Institutes of Health, National Institute of Diabetes and Digestive and Kidney Diseases (USA)                           |

**eTable 2.** Characteristics of included prospective cohort studies of saturated fatty acids and health outcomes. (FA=fatty acids; DM=diabetes mellitus; CVD=cardiovascular disease; BMI=body mass index; MI=myocardial infarction; CHD=coronary heart disease; BP=blood pressure; ECG=electrocardiogram)

| Source (Country)                                                                  | Age (years) | Sex (% Men) | Number of Participants | Number of Events                                                        | Follow-up (years) | Exposures Assessed                                                                          | Exposure Contrast                                              | Outcome validation                                                                                                                                                                     | Adjustment for confounders                                                                                                                                                                                                                                           | NOS Score | Funding                                                                                                                                                      |
|-----------------------------------------------------------------------------------|-------------|-------------|------------------------|-------------------------------------------------------------------------|-------------------|---------------------------------------------------------------------------------------------|----------------------------------------------------------------|----------------------------------------------------------------------------------------------------------------------------------------------------------------------------------------|----------------------------------------------------------------------------------------------------------------------------------------------------------------------------------------------------------------------------------------------------------------------|-----------|--------------------------------------------------------------------------------------------------------------------------------------------------------------|
| Tanasescu et al. 2004<br>United States<br>Nurses' Health Study                    | 50-75       | 0           | 5 672                  | 619 cases of CVD<br>(268 non-fatal MI,<br>183 fatal MI, 168<br>strokes) | ~10               | Median saturated<br>fat intake<br>(validated FFQ)                                           | Q5 vs. Q1<br>(19.1 to 10.8 % E)                                | Self-reported MI confirmed<br>by physician review of<br>medical records. Deaths<br>were reported by next of<br>kin, work associates, postal<br>authorities, or National<br>Death Index | Age, smoking,<br>postmenopausal<br>hormone use, parental<br>history of MI before<br>60y, alcohol intake,<br>physical activity, BMI,<br>total caloric intake,<br>protein intake, fibre<br>intake, multivitamin<br>use, vitamin E<br>supplement use,<br>medication use | 8         | NIH<br>(USA)                                                                                                                                                 |
| Tucker et al. 2005<br>United States<br>Baltimore Longitudinal Study<br>of Aging   | 34-80       | 100         | 501                    | 71 deaths from CHD                                                      | 18                | Mean saturated<br>fat intake, as<br>percent of total<br>dietary intake<br>(7-d diet record) | Survivors: 12.3%<br>CHD Deaths: 13.8%<br>Non-CHD Deaths: 14.0% | Consensus of three<br>physicians using death<br>certificates, hospital<br>records, and/or autopsy<br>data.                                                                             | Age at first visit, total<br>energy intake, BMI,<br>smoking, alcohol use,<br>dietary supplements,<br>physical activity                                                                                                                                               | 8         | US<br>Departmen<br>t of<br>Agriculture<br>Agricultural<br>Research<br>Service,<br>NIH<br>National<br>Institute on<br>Aging<br>Intramural<br>Program<br>(USA) |
| van Dam et al. 2002<br>United States<br>Health Professionals' Follow-<br>up Study | 40-75       | 100         | 42 504                 | 1321 incident cases<br>of T2DM                                          | 12                | Median saturated<br>fat intake<br>(validated FFQ)                                           | Q5 vs. Q1<br>(14 to 7.6 % E)                                   | Supplementary<br>questionnaire provided to<br>any new diagnoses of<br>diabetes, validated by<br>blinded physician                                                                      | Age, total energy<br>intake, time period,<br>physical activity,<br>smoking, alcohol<br>consumption,<br>hypercholesterolemia,<br>hypertension, family<br>history of type 2<br>diabetes, cereal fibre,<br>magnesium, BMI                                               | 8         | National<br>Institute of<br>Health<br>(USA)                                                                                                                  |

**eTable 2.** Characteristics of included prospective cohort studies of saturated fatty acids and health outcomes. (FA=fatty acids; DM=diabetes mellitus; CVD=cardiovascular disease; BMI=body mass index; MI=myocardial infarction; CHD=coronary heart disease; BP=blood pressure; ECG=electrocardiogram)

| Source (Country)                                                   | Age (years) | Sex (% Men) | Number of Participants | Number of Events                                                                                | Follow-up (years) | Exposures Assessed                                                         | Exposure Contrast                                     | Outcome validation                                                                                                                                                                        | Adjustment for confounders                                                                                                                                                                                                                                                                                                                                                                                                      | NOS Score | Funding                                                                                                                                   |
|--------------------------------------------------------------------|-------------|-------------|------------------------|-------------------------------------------------------------------------------------------------|-------------------|----------------------------------------------------------------------------|-------------------------------------------------------|-------------------------------------------------------------------------------------------------------------------------------------------------------------------------------------------|---------------------------------------------------------------------------------------------------------------------------------------------------------------------------------------------------------------------------------------------------------------------------------------------------------------------------------------------------------------------------------------------------------------------------------|-----------|-------------------------------------------------------------------------------------------------------------------------------------------|
| Wu et al. 2011<br>United States<br>Cardiovascular Health study     | ≥65         | 37          | 2 890                  | 631 CHD events, 61 sudden cardiac arrest events                                                 | 7                 | Mean saturated fatty acid intake (particularly palmitic) (validated SQFFQ) | ~ 25.3 (23.5-27.5)                                    | Determined by a centralized morbidity and mortality committee                                                                                                                             | Total energy, age, sex, race, education, income, smoking status, prevalent diabetes, hypertension, stroke, transient ischemic attack, BMI, physical activity, alcohol use, total fat intake, phospholipid concentrations of long-chain n-3 fatty acids and trans FAs, systolic BP, fasting HDL cholesterol, LDL cholesterol, triglycerides, C-reactive protein, fibrinogen, incident angina, phospholipid concentration of 14:0 | 9         | National Heart, Lung and Blood Institute, NIH Office of Dietary Supplements National Institute of Neurological Disorders and Stroke (USA) |
| Xu et al. 2006<br>United States<br>Strong Heart Study              | 45-74       | 36          | 2 938                  | 436 incident CHD (298 non-fatal CHD, 138 fatal CHD)                                             | 7                 | Total saturated fatty acid intake (24-hour recall)                         | 47-59 y: 12.2 vs. 1.7% E<br>60-79 y: 11.7 vs. 11.1% E | CHD events during the follow-up period were ascertained from annual mortality and morbidity surveillance or at the third examination. Fatal CHD events were confirmed by medical records. | Sex, age, study, center, diabetes, BMI, HDL-C, LDL-C, triacylglycerol, smoking, alcohol, hypertension, dietary protein, total energy                                                                                                                                                                                                                                                                                            | 7         | National Heart, Lung and Blood Institute (US)                                                                                             |
| Yaemsiri et al. 2012<br>United States<br>Womens' Health Initiative | 50-79       | 0           | 87 025                 | 1,049 ischemic stroke, 101 atherosclerotic stroke, 269 lacunar stroke, 244 cardioembolic stroke | 7.6               | Median intake of saturated fatty acids (validated FFQ)                     | Q5 vs. Q1 (26.1 to 12.9 g/day)                        | Self report; adjudicated by local physicians and centrally by trained neurologists                                                                                                        | Age, race, education, income, smoking, HRT use, physical activity, alcohol, history of CHD, history of A. Fib, history of diabetes, aspirin use, use of antihypertensives, use of cholesterol-lowering medication, BMI, SBP, total energy, vitamin E, fruits and vegetables intake, fiber                                                                                                                                       | 8         | National Heart, Lung, and Blood Institute (USA)                                                                                           |

**eTable 2.** Characteristics of included prospective cohort studies of saturated fatty acids and health outcomes. (FA=fatty acids; DM=diabetes mellitus; CVD=cardiovascular disease; BMI=body mass index; MI=myocardial infarction; CHD=coronary heart disease; BP=blood pressure; ECG=electrocardiogram)

| Source (Country)                                                                            | Age (years) | Sex (% Men) | Number of Participants | Number of Events                                                                                | Follow-up (years) | Exposures Assessed                                     | Exposure Contrast              | Outcome validation                                                                                                                            | Adjustment for confounders                                                                                                                                                                                                                                                                | NOS Score | Funding                                                                                                                 |
|---------------------------------------------------------------------------------------------|-------------|-------------|------------------------|-------------------------------------------------------------------------------------------------|-------------------|--------------------------------------------------------|--------------------------------|-----------------------------------------------------------------------------------------------------------------------------------------------|-------------------------------------------------------------------------------------------------------------------------------------------------------------------------------------------------------------------------------------------------------------------------------------------|-----------|-------------------------------------------------------------------------------------------------------------------------|
| Yaemsiri et al. 2012<br>United States<br>Womens' Health Initiative                          | 50-79       | 0           | 87 025                 | 1,049 ischemic stroke, 101 atherosclerotic stroke, 269 lacunar stroke, 244 cardioembolic stroke | 7.6               | Median intake of saturated fatty acids (validated FFQ) | Q5 vs. Q1 (26.1 to 12.9 g/day) | Self report; adjudicated by local physicians and centrally by trained neurologists                                                            | Age, race, education, income, smoking, HRT use, physical activity, alcohol, history of CHD, history of A. Fib, history of diabetes, aspirin use, use of antihypertensives, use of cholesterol-lowering medication, BMI, SBP, total energy, vitamin E, fruits and vegetables intake, fiber | 8         | National Heart, Lung, and Blood Institute (USA)                                                                         |
| Yamagishi et al. 2013<br>Japan<br>Japan Public Health Center-based (JPHC) Prospective Study | 45-74       | 46          | 81,931                 | 3192 incident strokes (610 MI, 116 sudden cardiac deaths)                                       | 11.1              | Median saturated fatty acid intake (validated FFQ)     | Q5 vs. Q1 (24.9 to 9.6 g/day)  | Physicians in hospitals, or study investigators reviewed the medical records of participants that required hospitalisation                    | Total energy intake, age, sex, cohort, baseline BMI, smoking, alcohol intake, sports in leisure time, walking and standing time, perceived mental stress, employment status, energy-adjusted intakes of carbohydrate, cholesterol, vegetables, fruit, calcium                             | 7         | Ministry of Health, Labour, and Welfare of Japan, Ministry of Education, Culture, Sports, Science, and Technology Japan |
| Yamagishi et al. 2013; U.S.A.;<br>Atherosclerosis Risk in Communities (ARIC) Study          | 45-64       | 48          | 3,870                  | 168 ischemic strokes                                                                            | 20                | Total saturated fat, isomers (CE and PPL)              | Q4 vs. Q1                      | Calls to participants, review of hospital discharge lists, death certificates; physician-adjudicated using National Survey of Stroke criteria | Age, sex, smoking, alcohol [also considered BMI, education, sports index, HRT use, energy intake, fish oil use                                                                                                                                                                            | 7         | National Heart, Lung, and Blood Institute (USA), National Institutes of Health (USA)                                    |

**eTable 2.** Characteristics of included prospective cohort studies of saturated fatty acids and health outcomes. (FA=fatty acids; DM=diabetes mellitus; CVD=cardiovascular disease; BMI=body mass index; MI=myocardial infarction; CHD=coronary heart disease; BP=blood pressure; ECG=electrocardiogram)

| Source (Country)                                                                      | Age (years) | Sex (% Men) | Number of Participants | Number of Events                                | Follow-up (years) | Exposures Assessed                                                | Exposure Contrast                                                                                | Outcome validation                                                                                 | Adjustment for confounders                                                                                                                                                                                                                                                                                                                                                                                                      | NOS Score | Funding                                                                                                                                   |
|---------------------------------------------------------------------------------------|-------------|-------------|------------------------|-------------------------------------------------|-------------------|-------------------------------------------------------------------|--------------------------------------------------------------------------------------------------|----------------------------------------------------------------------------------------------------|---------------------------------------------------------------------------------------------------------------------------------------------------------------------------------------------------------------------------------------------------------------------------------------------------------------------------------------------------------------------------------------------------------------------------------|-----------|-------------------------------------------------------------------------------------------------------------------------------------------|
| Wang et al. 2003<br>United States<br>Atherosclerosis Risk in Communities (ARIC) Study | 45-64       | 47          | 2 909                  | 252 incident cases of diabetes                  | 9                 | Plasma fatty acid concentration (for palmitic and stearic acid)   | Incident diabetes: 12% E<br>No diabetes: 11.6% E                                                 | Incident diabetes was identified during follow-up visits, or diagnosed by physician after baseline | Age, sex, baseline BMI, waist-to-hip ratio, alcohol intake, smoking, physical activity, education, parental history of diabetes                                                                                                                                                                                                                                                                                                 | 7         | National Heart, Lung, and Blood Institute                                                                                                 |
| Wiberg et al. 2006<br>Sweden<br>Uppsala Longitudinal Study of Adult Men               | ≥50         | 100         | 2313                   | 421 stroke or transient ischemic attack         | 32                | Measured with fatty acid principle component (FPAC) for mean SFAs | Myristic Acid: 1.2 (ICH) vs. 1.1 (no count)<br>Palmitic Acid: 11.8 (ICH) vs. 11.7 (no count) % E | Swedish hospital discharge record and cause-of death registries                                    | hypertension, diabetes, metabolic syndrome, serum cholesterol, atrial fibrillation, cardiovascular disease, smoking, physical activity, treatment with cardiovascular drugs at baseline, treatment with antihypertensive or antidiabetic medications or lipid-lowering drugs,                                                                                                                                                   | 5         | Medical Faculty at Uppsala University, the Uppsala Geriatric Fund, Swedish Heart Lung Foundation                                          |
| Wu et al. 2011<br>United States<br>Cardiovascular Health Study                        | ≥65         | 37          | 2 890                  | 631 CHD events, 61 sudden cardiac arrest events | 7                 | Mean saturated fatty acid intake (stearic acid) (validated SQFFQ) | ~ 13.4 (1.1)                                                                                     | Determined by a centralized morbidity and mortality committee                                      | Total energy, age, sex, race, education, income, smoking status, prevalent diabetes, hypertension, stroke, transient ischemic attack, BMI, physical activity, alcohol use, total fat intake, phospholipid concentrations of long-chain n-3 fatty acids and trans FAs, systolic BP, fasting HDL cholesterol, LDL cholesterol, triglycerides, C-reactive protein, fibrinogen, incident angina, phospholipid concentration of 14:0 | 9         | National Heart, Lung and Blood Institute, NIH Office of Dietary Supplements National Institute of Neurological Disorders and Stroke (USA) |

**eTable 2.** Characteristics of included prospective cohort studies of saturated fatty acids and health outcomes. (FA=fatty acids; DM=diabetes mellitus; CVD=cardiovascular disease; BMI=body mass index; MI=myocardial infarction; CHD=coronary heart disease; BP=blood pressure; ECG=electrocardiogram)

| Source (Country)                                                                                                              | Age (years) | Sex (% Men) | Number of Participants | Number of Events                                               | Follow-up (years) | Exposures Assessed                                        | Exposure Contrast                                                                                                 | Outcome validation                                                                                                                                                                                     | Adjustment for confounders                                                                                                                                                      | NOS Score | Funding                                                                                                                         |
|-------------------------------------------------------------------------------------------------------------------------------|-------------|-------------|------------------------|----------------------------------------------------------------|-------------------|-----------------------------------------------------------|-------------------------------------------------------------------------------------------------------------------|--------------------------------------------------------------------------------------------------------------------------------------------------------------------------------------------------------|---------------------------------------------------------------------------------------------------------------------------------------------------------------------------------|-----------|---------------------------------------------------------------------------------------------------------------------------------|
| Misirli et al. 2012<br>Greece<br>European Prospective Investigation into Cancer and Nutrition (EPIC Study), Greek-EPIC Cohort | 25-67       | 41          | 23 601                 | 395 incident cases, 196 deaths from cerebrovascular diseases   | 10.6              | Mean saturated fatty acid consumption (validated FFQ)     | 29.5 g/day with 12 g/day increments                                                                               | Endpoint confirmed through medical records, nonfatal first events or through death certificates (for fatal events)                                                                                     | Sex, age, smoking status, BMI, education, physical activity level, energy intake, hypertension, diabetes mellitus, Mediterranean diet score                                     | 8         | Stavros Niarchos Foundation , Hellenic Health Foundation (Greece)                                                               |
| Schoenaker et al. 2012<br>EURODIAB Prospective Complications Study (Multiple – Across Europe)                                 | 15-60       | 51          | 2 108                  | 148 fatal and non-fatal CVD incident cases, 46-all cause death | 7.4               | Median saturated fat intake (validated 3d dietary record) | Q3 vs. Q1 (45.4 to 28.6 g/day)                                                                                    | Events determined using questionnaires, hospital records, death certificates, or other healthcare documents                                                                                            | Age, sex, energy, diabetes duration, HbA1c, smoking status, physical activity, alcohol, total dietary fibre, MUFA, PUFA, antihypertensive use, daily insulin dose and frequency | 7         | Welcome Trust, European Community and Diabetes UK, Gesellschaft der Freunde und Förderer of Heinrich-Heine-University (Germany) |
| Schulze et al. 2008<br>Germany<br>European Prospective Investigation into Cancer and Nutrition (EPIC Study), EPIC-Potsdam     | 35-65       | 39          | 25 067                 | 844 incident cases of T2DM (physician-diagnosed)               | 7                 | Total saturated fat consumed (validated SQFFQ)            | Q5 vs. Q1 of quintiles of carbohydrate intake (% energy)<br><br>(M: 35.4 to 45.8 % E)<br><br>(F: 32.6 to 42.9 %E) | Self-reports of diabetes diagnosis, diabetes-relevant medication or dietary treatment due to diabetes. Questionnaires were sent to diagnosing physician , only physician-diagnosed cases were included | Age, education, occupational activity, sport activity, cycling, smoking, alcohol intake, total energy intake, fibre intake, magnesium intake, PUFA:SFA ratio and MUFA:SFA ratio | 8         | Federal European Union, German Cancer Aid, Ministry of Science (Germany)                                                        |

**eTable 2.** Characteristics of included prospective cohort studies of saturated fatty acids and health outcomes. (FA=fatty acids; DM=diabetes mellitus; CVD=cardiovascular disease; BMI=body mass index; MI=myocardial infarction; CHD=coronary heart disease; BP=blood pressure; ECG=electrocardiogram)

| Source (Country)                                                                                                                      | Age (years) | Sex (% Men) | Number of Participants | Number of Events                                                | Follow-up (years) | Exposures Assessed                                 | Exposure Contrast             | Outcome validation                                                                                                                                                                                                                                                                                                | Adjustment for confounders                                                                                                                                                                                                                                                                                                                                                                     | NOS Score | Funding                                                                      |
|---------------------------------------------------------------------------------------------------------------------------------------|-------------|-------------|------------------------|-----------------------------------------------------------------|-------------------|----------------------------------------------------|-------------------------------|-------------------------------------------------------------------------------------------------------------------------------------------------------------------------------------------------------------------------------------------------------------------------------------------------------------------|------------------------------------------------------------------------------------------------------------------------------------------------------------------------------------------------------------------------------------------------------------------------------------------------------------------------------------------------------------------------------------------------|-----------|------------------------------------------------------------------------------|
| Trichopoulos et al. 2006<br>Greece<br>European Prospective Investigation into Cancer and Nutrition (EPIC Study),<br>Greek-EPIC Cohort | NR          | 42          | 1013                   | 80 deaths (46 CVD deaths, 19 from cancer, 15 from other causes) | 4.5               | (validated, interview-administered FFQ)            | M: 28 g/day<br>W: 23 g/day    | Not mentioned                                                                                                                                                                                                                                                                                                     | Gender, age, educational level, smoking, waist-to-height, hip circumference, physical activity, metabolic activity task score, total energy intake, treatment with insulin, treatment for hypertension at enrolment, treatment for hypercholesterolaemia at enrolment, flour, flakes, starches, pasta, rice, other grain, bread, crisp bread, rusks, breakfast cereals, biscuit, dough, pastry | 8         | Europe Against Cancer Program (EU), Greek Ministries of Health and Education |
| Seino et al. 1997<br>Japan<br>Shibata Study                                                                                           | ≥40         | 42          | 2283                   | 460 deaths (141 from stroke)                                    | 15.5              | Mean saturated fatty acid intake (validated SQFFQ) | Q4 vs. Q1 (15.4 to 7.2 g/day) | Annual follow-up examination and registration system where general practitioners, public health nurses, and ambulance personnel would notify the study of possible stroke patients. Death certificates, social insurance records and medical records of the clinics and hospitals were also reviewed periodically | Age, sex, diastolic blood pressure, atrial fibrillation; total fat adjusted intake of a specific type of lipid, total energy adjusted intake of total fat and total energy                                                                                                                                                                                                                     | 7         | Not reported                                                                 |
| Kromhout et al. 2000<br>Finland, Italy, Greece, former Yugoslavia, Japan, USA, Netherlands<br>Seven Countries Study                   | 40-59       | 100         | 12 763                 | 5973 deaths                                                     | 25                | Saturated fat intake (weighted record)             | Multiple comparisons possible | Vital status established by Blackburn and/or Menotti                                                                                                                                                                                                                                                              | Age, Smoking, alcohol intake,                                                                                                                                                                                                                                                                                                                                                                  | 7         | Netherlands Nutrition Foundation                                             |



**eTable 2.** Characteristics of included prospective cohort studies of saturated fatty acids and health outcomes. (FA=fatty acids; DM=diabetes mellitus; CVD=cardiovascular disease; BMI=body mass index; MI=myocardial infarction; CHD=coronary heart disease; BP=blood pressure; ECG=electrocardiogram)

| Source (Country)                                                     | Age (years) | Sex (% Men) | Number of Participants | Number of Events               | Follow-up (years) | Exposures Assessed                                                             | Exposure Contrast                              | Outcome validation                                                                                                  | Adjustment for confounders                                                                                                                            | NOS Score | Funding                                                                                                                                                                              |
|----------------------------------------------------------------------|-------------|-------------|------------------------|--------------------------------|-------------------|--------------------------------------------------------------------------------|------------------------------------------------|---------------------------------------------------------------------------------------------------------------------|-------------------------------------------------------------------------------------------------------------------------------------------------------|-----------|--------------------------------------------------------------------------------------------------------------------------------------------------------------------------------------|
| Alhazmi et al., 2013; Australia Longitudinal Study on Women's Health | 45-50       | 0           | 9 101                  | 311 incident cases             | 6                 | Saturated fat intake (Dietary Questionnaire for Epidemiological Studies; DQES) | Q5 vs. Q1                                      | Self-reported t2dm; validated by linkage to Medicare (MBS) and Pharmaceutical Benefits Service (PBS)- 70% confirmed | Area of residence, education, current smoking, physical activity, self-rated health, menopausal status, BMI, alcohol, total energy, fibre, other fats | 6         | Australian Government Department of Health and Ageing                                                                                                                                |
| Chien et al., 2013; Japan (Chin-Shan)                                | ≈60         | 47          | 3,602                  | 568 deaths; 275 CVD events     | ≈10               | Total saturated-fatty acids (Plasma)                                           | 56.3% vs. 45% of total fat                     | Official death certificates verified by house-to-house visits                                                       | Age, gender, BMI, smoking, drinking, marital status, education level, job and sports activity, hypertension, diabetes, LDL-C and HDL-C                | 7         | National Science Council; National Taiwan University (Taiwan)                                                                                                                        |
| Wakai et al., 2014; Japan (JACC)                                     | ≈56         | 39          | 58,672                 | 11,656 deaths; 1,665 CV deaths | 19.3              | Total saturated fat (validated SQFFQ)                                          | 7.3 vs. 3.0% E                                 | Population registries (mandatory reporting); causes of death from death certificates                                | Age, area, education, smoking, alcohol, BMI, sleep duration, walking, F&V, total energy                                                               | 8         | Ministry of education, science, sports, culture of Japan; Japanese Ministry of Education, Culture, Sports, Science, and Technology, National Cancer Center Research Development Fund |
| Shekelle et al., 1981; U.S.A. (Western Electric Study)               | 40-55       | 100         | 1,900                  | 215 CHD deaths                 | 19                | Total saturated fat (Burke diet history)                                       | 1-unit increase                                | Death certificates for all decedants reviewed and adjudicated according to ICD-8                                    | Age, SBP, smoking, serum cholesterol, alcohol, BMI, ancestry                                                                                          | 6         | American and Chicago Heart Associations; private donors; National Cancer Institute                                                                                                   |
| Kushi et al., 1985; U.S.A.-Ireland (Ireland-Boston Heart Study)      | 40-60       | 100         | 1,001                  | 110 CHD deaths                 | 23                | Total saturated fat (Burke diet history)                                       | Top 3 <sup>rd</sup> vs. Bottom 3 <sup>rd</sup> | Death certificates for all decedants reviewed and adjudicated according to ICD-9                                    | Age, cohort, SBP, serum cholesterol, LVH, smoking, alcohol                                                                                            | 6         | NIH, Irish Heart Foundation, Harvard School of Public Health                                                                                                                         |

**eTable 2.** Characteristics of included prospective cohort studies of saturated fatty acids and health outcomes. (FA=fatty acids; DM=diabetes mellitus; CVD=cardiovascular disease; BMI=body mass index; MI=myocardial infarction; CHD=coronary heart disease; BP=blood pressure; ECG=electrocardiogram)

| Source (Country)                                                                 | Age (years) | Sex (% Men) | Number of Participants | Number of Events                       | Follow-up (years) | Exposures Assessed                                                                 | Exposure Contrast           | Outcome validation                                                     | Adjustment for confounders                                                                                                                                                                                           | NOS Score | Funding                                                                                                                                                                                |
|----------------------------------------------------------------------------------|-------------|-------------|------------------------|----------------------------------------|-------------------|------------------------------------------------------------------------------------|-----------------------------|------------------------------------------------------------------------|----------------------------------------------------------------------------------------------------------------------------------------------------------------------------------------------------------------------|-----------|----------------------------------------------------------------------------------------------------------------------------------------------------------------------------------------|
| Virtanen et al., 2014; Finland (Kuopio Ischemic Heart Disease Risk Factor Study) | 42-60       | 100         | 1,981                  | 183 fatal and 382 non-fatal CHD events | 21.4              | Total saturated fat (4-day prospective diet record)                                | Q4 vs. Q1 (22.8% vs. 13.4%) | Link to national death registry; adjudicated according to ICD-9        | Age, examination year, energy intake, BMI, diabetes, hypertension, family history of CHD, pack-years of smoking, education, leisure-time physical activity, alcohol, fiber, % energy from protein, other fatty acids | 9         | University of Eastern Finland                                                                                                                                                          |
| Mahendran et al., 2014; Finland (METSIM Cohort)                                  | 45-73       | 100         | 735                    | 30 incident type 2 diabetes cases      | 5                 | Erythrocyte fatty acids (total saturated and isomers)                              | 1-unit increase             | Some cases (23/30) diagnosed by OGTT at 5-y mark (remaining 7 unclear) | Age, BMI, smoking, physical activity, Matsuda insulin-sensitivity-index,                                                                                                                                             | 6         | Academy of Finland, Institute of Biomedicine Physiology, Institute of Eastern Finland, University of Eastern Finland, Kuopio University Hospital, Finnish Diabetes Research Foundation |
| De Goede et al., 2014; Netherlands (Zutphen Elderly Study)                       | 65-85       | 100         | 686                    | 132 incident CHD events                | 15                | Total and food sources of saturated fat ( <i>Cross-check diet history method</i> ) | T3 vs. T1 (21.7 vs. 14.2%)  | Municipal population registries and hospital or GP records             | Age, smoking, BMI, physical activity, socioeconomic status, alcohol, total energy, carbohydrates, protein, MUFA, trans fats, dietary fibre                                                                           | 8         | National Cancer Institute (U.S.), Academy of Finland                                                                                                                                   |

**eTable 3.** Characteristics of included nested case-control, and case-cohort studies of saturated fatty acids and health outcomes. (FA=fatty acids; DM=diabetes mellitus; CVD=cardiovascular disease; BMI=body mass index; MI=myocardial infarction; CHD=coronary heart disease; BP=blood pressure; ECG=electrocardiogram)

| Source (Country)                                                                  | Age (years) <sup>1</sup> | Sex (% Men) <sup>2</sup> | Number of Cases/Controls | Case definition                                              | Control definition                                             | Follow-up (y) | Exposures Assessed                                                                                                               | Exposure Contrast                                                                                                                                                                                                                                                                                                           | Case assessment                                               | Adjustment for confounders                                                                                                      | NOS Score | Funding                                                                                                                      |
|-----------------------------------------------------------------------------------|--------------------------|--------------------------|--------------------------|--------------------------------------------------------------|----------------------------------------------------------------|---------------|----------------------------------------------------------------------------------------------------------------------------------|-----------------------------------------------------------------------------------------------------------------------------------------------------------------------------------------------------------------------------------------------------------------------------------------------------------------------------|---------------------------------------------------------------|---------------------------------------------------------------------------------------------------------------------------------|-----------|------------------------------------------------------------------------------------------------------------------------------|
| Clarke et al. 2009 (Whitehall; nested case-control)                               | 79 (5)                   | 100                      | 116/239 [1:2]            | CHD deaths in individuals with no history of CVD at baseline | Participants in Whitehall with no history of CVD or statin use | 30            | Phospholipid fatty acids (16:0, 18:0, total SFA)                                                                                 | 46.1% vs. 41.5% (4.6%) total SFA                                                                                                                                                                                                                                                                                            | Identified from Office for National Statistics                | Age, employment grade, SBP, BMI, smoking, diabetes, apo A, HDL-C, apo-B, LDL-C, CRP, fibrinogen, albumin                        | 6         | British Heart Foundation(UK), Medical Research Council (UK), Fisheries Scholarship Grant, National Fisheries Institute (USA) |
| Hodge et al. 2007 (Melbourne Collaborative Cohort Study; prospective case-cohort) | 58/55                    | 51/43                    | 346/3391 [1:10]          | Self-reported type 2 diabetes                                | Randomly sampled from the cohort                               | 4             | Dietary saturated fat (total, 15:0, 16:0, 18:0), phospholipid fatty acids (total, 15:0, 16:0, 18:0)                              | Q5 vs. Q1 (not stated)                                                                                                                                                                                                                                                                                                      | confirmed by family physician                                 | Age, sex, country of birth, family history of DM, physical activity, alcohol, BMI, WHR                                          | 8         | VicHealth, Cancer Council Victoria, National Health and Medical Research Council (Australia)                                 |
| Kröger et al. 2011 (EPIC-Potsdam; prospective case-cohort)                        | 55/50                    | 58/39                    | 673/2114 [1:3]           | Self-reported t2dm during follow-up                          | Random sample; representative of cohort at baseline            | 7             | Erythrocyte fatty acids (14:0 to 18:0; 20:0 to 24:0, total SFA); also dietary fatty acids (14:0 to 20:0, 22:0; total SFA) by FFQ | Erythrocyte membrane FA (Q5 v Q1) [% total]<br>14:0 – 0.57 v. 0.23%<br>15:0- 0.32 v. 0.13%<br>16:0- 25.6 v. 19.8%<br>17:0-0.41 v. 0.26%<br>18:0- 15.1 v. 12.2%<br>20:0 0.52 v. 0.30%<br>21:0-0.07 v. 0.02%<br>22:0-2.15 v. 1.16%<br>23:0-0.39 v. 0.19%<br>24:0- 5.6 v. 3.1%<br>Dairy: 0.71 v. 0.41%<br>Total: 48.6 v. 41.2% | Self report; confirmed by interview with diagnosing physician | Age, sex, BMI, waist, cycling, sports activity, education, coffee intake, smoking, alcohol intake, occupational activity, fiber | 8         | Federal Ministry of Science, German Cancer Aid, German Research Foundation (Germany); European Community                     |

<sup>1</sup> If a single number presented, represents mean age of all participants; if “x/y” then this is mean age of cases/controls

<sup>2</sup> If a single number presented, represents percentage of all participants who were men; if “x/y” then this percentage of cases/controls who were men

**eTable 3.** Characteristics of included nested case-control, and case-cohort studies of saturated fatty acids and health outcomes. (FA=fatty acids; DM=diabetes mellitus; CVD=cardiovascular disease; BMI=body mass index; MI=myocardial infarction; CHD=coronary heart disease; BP=blood pressure; ECG=electrocardiogram)

| Source (Country)                                                 | Age (years) <sup>3</sup> | Sex (% Men) <sup>4</sup> | Number of Cases/Controls | Case definition                                                                                                                                   | Control definition                                                                                                    | Follow-up (y) | Exposures Assessed                                                                        | Exposure Contrast                                                                                                                                                       | Case assessment                                                                       | Adjustment for confounders                                                                                                                                                                                                        | NOS Score | Funding                                         |
|------------------------------------------------------------------|--------------------------|--------------------------|--------------------------|---------------------------------------------------------------------------------------------------------------------------------------------------|-----------------------------------------------------------------------------------------------------------------------|---------------|-------------------------------------------------------------------------------------------|-------------------------------------------------------------------------------------------------------------------------------------------------------------------------|---------------------------------------------------------------------------------------|-----------------------------------------------------------------------------------------------------------------------------------------------------------------------------------------------------------------------------------|-----------|-------------------------------------------------|
| Simon et al. 1995 (MRFIT; nested case-control; USA)              | 35-57                    | 100                      | 94/94 [1:1]              | Men with fatal or non-fatal MI or sudden cardiac death                                                                                            | “Usual care” group subjects matched on age, randomization date, center                                                | 6.9           | Cholesterol ester FA and phospholipids (14:0, 16:0, 18:0)                                 | Per 1 standard deviation increase in % CE or PPL                                                                                                                        | Clinic, hospital records, next-of-kin interviews, death certificates, autopsy reports | Plasma cholesterol levels, DBP, tobacco use                                                                                                                                                                                       | 7         | National Heart, Lung, and Blood Institute (USA) |
| Sun et al. 2007 (Nurses’ Health Study; USA; nested case-control) | 30-55                    | 0                        | 166/327 [1:2]            | Ischemic Heart Disease                                                                                                                            | From cohort, matched on age, smoking, fasting status, date of blood draw                                              | 6             | Plasma and erythrocyte fatty acids (14:0, 15:0, 16:0, 17:0, 18:0); diet (14:0; 16:0)      | <u>T3 vs. T1 (%) [plasma]</u><br>15:0-> 0.21 vs. 0.11%<br>17:0-> 0.36 vs. 0.25%<br><u>T3 vs. T1 (%) [erythrocyte]</u><br>15:0-> 0.14 vs. 0.07%<br>17:0-> 0.40 vs. 0.29% | Self reported; confirmed by medical record review by blinded study physicians         | Age, date of blood draw, smoking, fasting status, BMI, post-menopausal status, physical activity, alcohol, aspirin, family history of MI, hypertension, hypercholesterolemia, history of diabetes, total <i>trans</i> fatty acids | 9         | National Institutes of Health (USA)             |
| Matthan et al., 2014 (WHI-OS); nested case-control               | 67.8                     | 0                        | 1224/1224 [1:1]          | CHD (hospitalized myocardial infarction [MI], definite silent MI, and coronary death defined as death consistent with CHD as the underlying cause | Selected from cohort without CVD, matched on age, date of enrollment, race/ethnicity, hysterectomy status at baseline | 4.5           | Total saturated fat, 12:0, 14:0, 15:0, 16:0, 18:0, 20:0, 22:0, 24:0 ( <i>plasma PPL</i> ) | <u>Per SD</u>                                                                                                                                                           | review of medical records and death certificate                                       | Age, enrollment date, race/ethnicity, hysterectomy status, BMI, SBP, smoking, education, medication use, HRT use, carbohydrate, protein, and alcohol                                                                              | 8         |                                                 |

<sup>3</sup> If a single number presented, represents mean age of all participants; if “x/y” then this is mean age of cases/controls

<sup>4</sup> If a single number presented, represents percentage of all participants who were men; if “x/y” then this percentage of cases/controls who were men

**eTable 3.** Characteristics of included nested case-control, and case-cohort studies of saturated fatty acids and health outcomes. (FA=fatty acids; DM=diabetes mellitus; CVD=cardiovascular disease; BMI=body mass index; MI=myocardial infarction; CHD=coronary heart disease; BP=blood pressure; ECG=electrocardiogram)

| Source (Country)                                               | Age (years) <sup>5</sup> | Sex (% Men) <sup>6</sup> | Number of Cases/Controls | Case definition                      | Control definition                                              | Follow-up (y) | Exposures Assessed                                                           | Exposure Contrast                                        | Case assessment                                                                                                                       | Adjustment for confounders                                                                                                                                              | NOS Score | Funding        |
|----------------------------------------------------------------|--------------------------|--------------------------|--------------------------|--------------------------------------|-----------------------------------------------------------------|---------------|------------------------------------------------------------------------------|----------------------------------------------------------|---------------------------------------------------------------------------------------------------------------------------------------|-------------------------------------------------------------------------------------------------------------------------------------------------------------------------|-----------|----------------|
| Salonen et al. 1985 (Finnish Heart Study; nested case-control) | 55/54                    | 76                       | 92/92 [1:1]              | CHD deaths                           | From cohort; matched on age, smoking, sex, cholesterol BP       | 5             | Serum FA (total PUFA, total SFA)                                             | Serum polyunsaturated/saturated FA ratio >0.28 vs. ≤0.28 | National death certificate register; cause of death was that assigned by Central Statistical Office                                   | Age, smoking, sex, cholesterol, BP, strong alcoholic beverages, absenteeism, diabetes, history of MI/angina in parent or sibling, cardiovascular medication, study area | 6         | Not stated     |
| Pierucci et al. 2012 (nested case-control; ONCONUT, Italy)     | 67                       | 62                       | 97/194 [1:2]             | Self-reported cases of MI            | Randomly selected from cohort; matched on diabetes, gender, age | 5             | Dietary SFA (validated FFQ)                                                  | Q3 vs. Q1                                                | Confirmed by discharge hospital records and ECG                                                                                       | Energy, age, gender, BMI, smoking, hypertension                                                                                                                         | 7         | Not stated     |
| Forouhi et al.; Europe; EPIC InterAct (case-cohort)            | 52±9                     |                          | 12,132/15,919 [1:1]      | self-reported incident diabetes data | Randomly selected noncases                                      | 16            | Total SFA, 14:0, 15:0, 16:0, 17:0, 18:0, 20:0, 22:0, 23:0, 24:0 (plasma PPL) | Per 1-SD difference                                      | linkage to primary care registers, secondary care registers, medication use (drug registers), hospital admissions, and mortality data | Age, centre, sex, physical activity, smoking, education, total energy, alcohol, BMI, meat, fruits and vegetables, soft drinks, total dairy products, HbA1c              | 8         | European Union |

<sup>5</sup> If a single number presented, represents mean age of all participants; if “x/y” then this is mean age of cases/controls

<sup>6</sup> If a single number presented, represents percentage of all participants who were men; if “x/y” then this percentage of cases/controls who were men

**eTable 4.** Characteristics of included retrospective case-control studies of saturated fatty acids and health outcomes. (FA=fatty acids; DM=diabetes mellitus; CVD=cardiovascular disease; BMI=body mass index; MI=myocardial infarction; CHD=coronary heart disease; BP=blood pressure; ECG=electrocardiogram)

| Source (Country)                    | Age     | Sex (% Men) | No. Cases/Controls | Case definition                                                                                   | Control definition                                                                  | Exposures assessed                                               | Exposure contrast                                                                                                                                                                                                 | Case Assessment                                                                                                                                                                            | Adjustment for confounders                                                                                                       | NOS score | Funding                                                                                                                     |
|-------------------------------------|---------|-------------|--------------------|---------------------------------------------------------------------------------------------------|-------------------------------------------------------------------------------------|------------------------------------------------------------------|-------------------------------------------------------------------------------------------------------------------------------------------------------------------------------------------------------------------|--------------------------------------------------------------------------------------------------------------------------------------------------------------------------------------------|----------------------------------------------------------------------------------------------------------------------------------|-----------|-----------------------------------------------------------------------------------------------------------------------------|
| Hodge et al. 1996 (Wanigelas, Koki) | ~40     | 52          | 145/140            | Those in the study diagnosed with NIDDM during follow-up                                          | Matched for age, sex, with normal glucose                                           | Dietary saturated fat; measured by FFQ administered by dietitian | 10 g increase in total saturated fat                                                                                                                                                                              | Diagnosed by a physician or observation of a 2h plasma glucose >10 mmol/L                                                                                                                  | Age, sex, BMI, WHR, physical activity                                                                                            | 6         | National Health and Medical Research Council (Australia)                                                                    |
| Park et al. 2009 (Korea)            | 56 (14) | 71          | 50/50              | Consecutively recruited acute non-fatal MI admitted to Hanyang University Kuri Hospital           | Matched on age and sex, with no history of CHD, cancer, hyperlipidemia, or diabetes | Erythrocyte SFA: 14:0, 16:0, 18:0                                | <u>T3 vs. T1 (%)</u><br>14:0->0.37 v. ≤0.26%<br>16:0->22.6 vs <21.6%<br>18:0->18.1 vs <16.3%                                                                                                                      | Hospital chart review                                                                                                                                                                      | Matching: age, sex<br>Covariates: Age, sex, history of DM, family history of CHD, smoking, hypertension, glucose, total-C, HDL-C | 3         | Korean Research Foundation                                                                                                  |
| Monteiro et al. 2007                | >44     | 57          | 290/697            | Consecutively admitted cases of ischemic stroke admitted to St. John's Hospital                   | Random digit dialling from parish registries in the hospital's catchment area       | Dietary SFA (FFQ)                                                | <u>Men</u><br>12:0 0.5 vs. 0.2 g<br>14:0 2.2 vs. 1.2 g<br>16:0 15.7 vs. 11.4 g<br>18:0 6.7 vs. 4.6 g<br><br><u>Women</u><br>12:0 0.5 vs. 0.2 g<br>14:0 2.0 vs. 1.2 g<br>16:0 13.0 vs. 9.9 g<br>18:0 5.7 vs. 4.1 g | Defined by clinical evaluation including imaging                                                                                                                                           | Age, education, energy, physical activity, smoking, alcohol, hypertension, dyslipidemia, diabetes, family history of CVD         | 8         | Project EPICardis, Science and Technology Foundation (Portugal)                                                             |
| Sun et al. 2011 (Nanjing, China)    | 63/61   | 69/64       | 108/129            | Cases of CAD (fatal and non-fatal) admitted to Nanjing, CHINA hospitals based on symptoms and ECG | Matched controls (within 5y), sex, obesity, DM                                      | Serum free FA (16:0, 18:1)                                       | Serum palmitic acid:oleic acid ratio                                                                                                                                                                              | CAD assessed independently by 2 angiographers; defined as ≥70% narrowing of lumen diameter of left anterior descending, left circumflex, R coronary artery; or ≥50% narrowing of left main | LDL-C:HDL-C, apo-B:HDL-C                                                                                                         | 5         | National Natural Science Foundation, 973 Program, The "111" project, Natural Science Foundation of Jiangsu Province (China) |

**eTable 4.** Characteristics of included retrospective case-control studies of saturated fatty acids and health outcomes. (FA=fatty acids; DM=diabetes mellitus; CVD=cardiovascular disease; BMI=body mass index; MI=myocardial infarction; CHD=coronary heart disease; BP=blood pressure; ECG=electrocardiogram)

| Source (Country)                    | Age   | Sex (% Men) | No. Cases/Controls | Case definition                                                                                                                          | Control definition                                                                                         | Exposures assessed                      | Exposure contrast                                                                  | Case Assessment                                                    | Adjustment for confounders                                                                                                                                                      | NOS score | Funding                             |
|-------------------------------------|-------|-------------|--------------------|------------------------------------------------------------------------------------------------------------------------------------------|------------------------------------------------------------------------------------------------------------|-----------------------------------------|------------------------------------------------------------------------------------|--------------------------------------------------------------------|---------------------------------------------------------------------------------------------------------------------------------------------------------------------------------|-----------|-------------------------------------|
| Aslibekyan et al. 2012 (Costa Rica) | 58    | 73          | 1815/1815          | Cases of first non-fatal MI residing in Central Valley of Costa Rica                                                                     | Matched on residence, age, sex                                                                             | Adipose tissue FA (15:0 and 17:0)       | <u>Q5 vs. Q1</u><br>15:0 (0.30 vs. 0.13%)<br>17:0 (0.27 vs. 0.14%)                 | Assessed by 2 independent cardiologists in participating hospitals | Total energy, age/sex/residence, income, physical activity, WHR, alcohol, adipose tissue ALA, history of hypertension, dyslipidemia, or DM, adipose tissue CLA, dietary calcium | 8         | National Institutes of Health (USA) |
| Biong et al. 2006 (Norway)          | 62    | 72          | 100/98             | Cases of first MI recruited from coronary care units of Ullevål Hospital (Oslo) and Østfold Central Hospital (Fredrikstad and Sarpsborg) | Frequency matched for age in 5-y intervals from catchment area of cases + friends and relatives of cases   | Adipose tissue FA (14:0, 15:0 and 17:0) | Q4 v. Q1<br>14:0->4.20 vs. <3.1%<br>15:0->0.47 vs. <0.36%<br>17:0->0.30 vs. <0.24% | Unclear                                                            | Age, sex, WHR, smoking, family history of CHD, education                                                                                                                        | 8         | Not stated                          |
| Lopes et al. 1998 (Portugal)        | 58±11 | 100         | 214/214            | Male patients ≥40 y.o. consecutively admitted to northern Portugal hospital with 1st MI, and 4-day survival                              | Population-based; men ≥40 y.o.; random digit dialing from catchment area of the hospital; no history of MI | Total saturated fat (validated FFQ)     | Q4 vs. Q1 (cutoffs not stated)                                                     | Attending cardiologist                                             | Matching: age, sex<br>Covariates: Age, education, family history of MI, smoking, physical activity, total energy, BMI                                                           | 7         | Not stated                          |
| Suh et al. 2001                     | ~55   | 100         | 108/142            | Admitted to university teaching hospital                                                                                                 | From departments of ophthalmology and orthopedic surgery with no history of CVD                            | Dietary total SFA (validated FFQ)       | Per 1% of energy intake                                                            | ECG confirmed (≥50% stenosis)                                      | BMI, smoking, energy intake, total fat                                                                                                                                          | 6         | Basic Research Medical Fund (Korea) |

**eTable 5.** Risk of bias of included reports from prospective cohort studies as assessed with the Newcastle-Ottawa Scale

| Study                                                       | References                     | Selection (4) | Comparability (2) | Outcome (3) | Total (9) | Comments                                                                                                                                                                 |
|-------------------------------------------------------------|--------------------------------|---------------|-------------------|-------------|-----------|--------------------------------------------------------------------------------------------------------------------------------------------------------------------------|
| Adult Health Study (Japan)                                  | Sauvaget                       | 1             | 2                 | 2           | 5         | Cohort exposed to Hiroshima atomic bomb may manifest CVD in unique ways; single-day food diary not validated; CVD prevalence at baseline unclear; attrition rate unclear |
| ATBC Study (Finland)                                        | Pietinen 1997                  | 4             | 1                 | 3           | 8         | Did not collect data on/or control for family history                                                                                                                    |
| ATBC Study (Finland)                                        | Simila 2012                    | 4             | 1                 | 3           | 8         | Did not collect data on/or control for family history                                                                                                                    |
| Atherosclerosis Risk in Communities (ARIC) study (USA)      | Wang                           | 4             | 1                 | 2           | 7         | Did not control for total energy intake; unclear if events formally adjudicated                                                                                          |
| Atherosclerosis Risk in Communities (ARIC) study (USA)      | Yamagishi 2013 Cerebrovasc Dis | 4             | 1                 | 2           | 7         | Did not control for family history; attrition rate unclear                                                                                                               |
| Australian Longitudinal Study on Women's Health (Australia) | Alhazmi 2013                   | 4             | 1                 | 1           | 6         | Did not control for family history; self-report of diabetes only with a 70% confirmation in a subset; attrition rate unclear                                             |
| Baltimore Longitudinal Study of Aging (USA)                 | Tucker                         | 4             | 1                 | 3           | 8         | Did not control for socioeconomic status or family history                                                                                                               |
| Caerphilly Prospective Study (UK)                           | Atkinson                       | 4             | 2                 | 2           | 8         | Attrition rate unclear                                                                                                                                                   |
| Caerphilly Prospective Study (UK)                           | Fehily                         | 4             | 0                 | 3           | 7         | CVD prevalence at baseline ≈25%; Did not control for socioeconomic status, family history, or total energy intake                                                        |
| Cardiovascular Health Study (USA)                           | Ma, 2015                       | 4             | 2                 | 3           | 9         |                                                                                                                                                                          |
| Cardiovascular Health Study (USA)                           | Mozaffarian, 2010              | 4             | 2                 | 3           | 9         |                                                                                                                                                                          |
| Cardiovascular Health study (USA)                           | Wang, 2015 [diabetes]          | 4             | 2                 | 3           | 9         |                                                                                                                                                                          |
| Diet, Cancer and Health (Denmark)                           | Jakobsen 2010                  | 4             | 0                 | 3           | 7         | Did not control for socioeconomic status or family history                                                                                                               |
| EPIC-Greece (Greece)                                        | Misirli                        | 4             | 1                 | 3           | 8         | Did not control for family history                                                                                                                                       |



**eTable 5.** Risk of bias of included reports from prospective cohort studies as assessed with the Newcastle-Ottawa Scale

| Study                                                            | References     | Selection (4) | Comparability (2) | Outcome (3) | Total (9) | Comments                                                                                                                                            |
|------------------------------------------------------------------|----------------|---------------|-------------------|-------------|-----------|-----------------------------------------------------------------------------------------------------------------------------------------------------|
| EPIC-Greece (Greece)                                             | Trichopoulou   | 4             | 1                 | 3           | 8         | Did not control for family history                                                                                                                  |
| EPIC-Norfolk (UK)                                                | Harding        | 4             | 1                 | 3           | 8         | Did not control for socioeconomic status                                                                                                            |
| EPIC-Potsdam (Germany)                                           | Schulze        | 4             | 1                 | 3           | 8         | Did not control for family history                                                                                                                  |
| EURODIAB Prospective Complications Study (16 European countries) | Shoenaker      | 4             | 0                 | 3           | 7         | Did not control for socioeconomic status or family history                                                                                          |
| Finnish Diabetes Prevention Study (Finland)                      | Lindstrom 2006 | 2             | 0                 | 3           | 5         | Participants with impaired glucose tolerance at baseline; did not control for socioeconomic status, smoking, total energy intake, or family history |
| Framingham Heart Study (USA)                                     | Gillman        | 4             | 0                 | 3           | 7         | Did not control for socioeconomic status or family history                                                                                          |
| Framingham Heart Study (USA)                                     | Posner         | 4             | 1                 | 3           | 8         | Did not control for family history                                                                                                                  |
| Health and Lifestyle Survey (UK)                                 | Boniface       | 4             | 1                 | 2           | 7         | Did not control for total energy intake; deaths not formally adjudicated                                                                            |
| Health Professionals' Follow-up Study (USA)                      | Ascherio 1996  | 4             | 2                 | 3           | 9         |                                                                                                                                                     |
| Health Professionals' Follow-up Study (USA)                      | He             | 4             | 1                 | 2           | 7         | Did not control for family history; attrition rate unclear                                                                                          |
| Health Professionals' Follow-up Study (USA)                      | van Dam        | 4             | 1                 | 3           | 8         | Did not control for family history                                                                                                                  |
| Honolulu Heart Program (USA)                                     | McGee 1985     | 3             | 0                 | 3           | 6         | 24-hour recall not validated; did not control for socioeconomic status or family history                                                            |
| Insulin Resistance Atherosclerosis Study (USA)                   | Santaren       | 4             | 1                 | 3           | 8         | Did not control for family history                                                                                                                  |
| Iowa Women's Health Study (USA)                                  | Meyer          | 4             | 1                 | 1           | 6         | Did not control for family history; self-reported diabetes diagnoses with poor validity (36% overreporting)                                         |

**eTable 5.** Risk of bias of included reports from prospective cohort studies as assessed with the Newcastle-Ottawa Scale

| Study                                                             | References                           | Selection (4) | Comparability (2) | Outcome (3) | Total (9) | Comments                                                                                                                                                                                                                                      |
|-------------------------------------------------------------------|--------------------------------------|---------------|-------------------|-------------|-----------|-----------------------------------------------------------------------------------------------------------------------------------------------------------------------------------------------------------------------------------------------|
| Ireland–Boston Diet–Heart Study (USA, Ireland)                    | Kushi                                | 3             | 0                 | 3           | 6         | Diet history not validated; Did not control for socioeconomic status or family history                                                                                                                                                        |
| Israeli Ischemic Heart Disease Study (Israel)                     | Goldbourt                            | 4             | 0                 | 3           | 7         | Did not control for socioeconomic status or family history                                                                                                                                                                                    |
| Japan Collaborative Cohort (Japan)                                | Wakai                                | 4             | 2                 | 2           | 8         | Response rate = 83%                                                                                                                                                                                                                           |
| Japan Public Health Center-based prospective Study (Japan)        | Yamagishi 2013<br>Eur H J            | 4             | 1                 | 2           | 7         | No family history adjustment; no information on attrition rate                                                                                                                                                                                |
| Kuopio Ischaemic Heart Disease Risk Factor (KIHD) Study (Finland) | Laaksonen                            | 4             | 2                 | 3           | 9         |                                                                                                                                                                                                                                               |
| Kuopio Ischemic Heart Disease Risk Factor (KIHD) Study (Finland)  | Virtanen                             | 4             | 2                 | 3           | 9         |                                                                                                                                                                                                                                               |
| Lipid Research Clinics (Canada)                                   | Esrey                                | 4             | 0                 | 2           | 6         | Did not control for socioeconomic status or family history; attrition rate unclear                                                                                                                                                            |
| Malmö Diet and Cancer Study (Sweden)                              | Leosdottir 2005;<br>2007             | 4             | 1                 | 2           | 7         | Did not control for family history; unclear if events formally adjudicated                                                                                                                                                                    |
| METSIM cohort (Finland)                                           | Mahendran 2014                       | 4             | 0                 | 2           | 6         | Subset of METSIM cohort (n=1346 of 10,197) representative of full cohort; did not control for family history or total energy intake; 23 of 30 incident cases of t2dm diagnosed at 5-y followup visit; 7 cases unclear ascertainment procedure |
| MONICA+ Cohorts (Denmark)                                         | Jakobsen 2004;<br>2007               | 4             | 2                 | 2           | 8         | Events ascertained through record linkage only prior to 1977                                                                                                                                                                                  |
| Multi-Ethnic Study of Atherosclerosis (USA)                       | De Oliveira Otto;<br>Mozafarran 2013 | 4             | 2                 | 3           | 9         |                                                                                                                                                                                                                                               |
| National Taiwan University Hospital Study (Taiwan)                | Chien                                | 4             | 1                 | 2           | 7         | Did not control for family history; response rate = 85%                                                                                                                                                                                       |

**eTable 5.** Risk of bias of included reports from prospective cohort studies as assessed with the Newcastle-Ottawa Scale

| Study                                                                          | References                               | Selection (4) | Comparability (2) | Outcome (3) | Total (9) | Comments                                                                                                                                                          |
|--------------------------------------------------------------------------------|------------------------------------------|---------------|-------------------|-------------|-----------|-------------------------------------------------------------------------------------------------------------------------------------------------------------------|
| Norwegian Countries Study (Norway)                                             | Laake                                    | 4             | 1                 | 1           | 6         | Did not control for family history; events not formally adjudicated                                                                                               |
| Nurses' Health Study (USA)                                                     | Willett 1993                             | 4             | 2                 | 3           | 9         | Sampling from homogenous profession effectively controls for socioeconomic status                                                                                 |
| Nurses' Health Study (USA)                                                     | Hu 1997                                  | 4             | 2                 | 3           | 9         | Sampling from homogenous profession effectively controls for socioeconomic status                                                                                 |
| Nurses' Health Study (USA)                                                     | Hu 1999                                  | 4             | 2                 | 3           | 9         | Sampling from homogenous profession effectively controls for socioeconomic status                                                                                 |
| Nurses' Health Study (USA)                                                     | Salmeron 2001                            | 4             | 2                 | 3           | 9         | Sampling from homogenous profession effectively controls for socioeconomic status                                                                                 |
| Nurses' Health Study (USA)                                                     | Oh 2005                                  | 4             | 2                 | 3           | 9         | Sampling from homogenous profession effectively controls for socioeconomic status                                                                                 |
| Nurses' Health study (USA)                                                     | Tanasescu 2004                           | 4             | 2                 | 2           | 8         | Attrition rate unclear                                                                                                                                            |
| Nurses' Health study and Health Professionals' Follow-up studies (pooled; USA) | Yakoob 2014 (diabetes) and 2014 (stroke) | 4             | 2                 | 3           | 9         | Sampling from homogenous profession effectively controls for socioeconomic status                                                                                 |
| Seven Countries Study (7 countries)                                            | Kromhout                                 | 4             | 0                 | 3           | 7         | Did not control for age, socioeconomic status, total energy intake, or family history                                                                             |
| Reasons for Geographical and Racial Differences in Stroke (USA)                | Kiagi 2013 [total mortality outcome]     | 4             | 2                 | 2           | 8         | Attrition rate unclear                                                                                                                                            |
| Reasons for Geographical and Racial Differences in Stroke (USA)                | Kiagi 2014 [stroke outcome]              | 4             | 1                 | 2           | 7         | Did not control for family history; attrition rate unclear                                                                                                        |
| Shibata City Cohort (Japan)                                                    | Seino                                    | 4             | 0                 | 3           | 7         | Did not control for socioeconomic status, smoking, or family history                                                                                              |
| Strong Heart Study (USA)                                                       | Xu 2006                                  | 3             | 1                 | 3           | 7         | Diet assessed with single 24-h recall; did not control for family history                                                                                         |
| Uppsala Longitudinal Study of Adult Men (Sweden)                               | Wiberg                                   | 3             | 0                 | 2           | 5         | No reliability measures for fatty acids; did not control for socioeconomic status, family history, or total energy intake; unclear if events formally adjudicated |

**eTable 5.** Risk of bias of included reports from prospective cohort studies as assessed with the Newcastle-Ottawa Scale

| Study                                                | References    | Selection (4) | Comparability (2) | Outcome (3) | Total (9) | Comments                                                                                                                                              |
|------------------------------------------------------|---------------|---------------|-------------------|-------------|-----------|-------------------------------------------------------------------------------------------------------------------------------------------------------|
| Vegetarian Society Study (UK)                        | Mann          | 3             | 1                 | 2           | 6         | CVD prevalence at baseline unclear; Vegetarians may differ from omnivores in other health behaviours; attrition rate unclear                          |
| Western Electric Study (U.S.A.)                      | Shekelle      | 3             | 0                 | 3           | 6         | Diet history not validated; did not control for family history, socioeconomic status, or total energy intake                                          |
| Western Norway B-Vitamin Intervention trial (Norway) | Puaschitz     | 4             | 0                 | 0           | 4         | All participants with coronary artery disease; did not control for socioeconomic status, total energy intake; death registry only; follow-up <5 years |
| Women's Health Initiative (USA)                      | Howard        | 4             | 1                 | 3           | 8         | Did not control for family history                                                                                                                    |
| Women's Health Initiative Observational Study (USA)  | Yaemsiri 2012 | 4             | 1                 | 3           | 8         | Did not control for family history                                                                                                                    |
| Women's Health Study (USA)                           | Song          | 4             | 1                 | 2           | 7         | Did not control for socioeconomic status; attrition rate unclear                                                                                      |
| Zutphen Elderly Study (Netherlands)                  | Oomen         | 4             | 0                 | 3           | 7         | Did not control for family history or socioeconomic status                                                                                            |
| Zutphen Elderly Study (Netherlands)                  | De Goede      | 4             | 1                 | 3           | 8         | Did not control for family history                                                                                                                    |

*Multiple publications from a single cohort (e.g. Nurses' Health Study, Health Professionals Follow-up Study, Malmö Diet and Cancer Study) were each rated independently because they measured different exposures or outcomes in each publication.*

**eTable 6.** Risk of bias of included prospective nested case-control/case-cohort and retrospective case-control studies as assessed with the Newcastle-Ottawa Scale

| Study                                                              | References               | Selection (4) | Comparability (2) | Outcome (3) | Total (9) | Comments                                                                                                                          |
|--------------------------------------------------------------------|--------------------------|---------------|-------------------|-------------|-----------|-----------------------------------------------------------------------------------------------------------------------------------|
| <b><i>Prospective nested case-control</i></b>                      |                          |               |                   |             |           |                                                                                                                                   |
| Whitehall Study (UK)                                               | Clarke                   | 4             | 0                 | 2           | 6         | Did not control for or match on family history or total energy intake; unclear if events formally adjudicated                     |
| Cardiovascular Health Study (USA)                                  | Lemaitre, 2006           | 4             | 1                 | 3           | 8         | Did not control for family history                                                                                                |
| European Prospective Investigation into Cancer (EPIC)-Norfolk (UK) | Khaw et al.              | 4             | 1                 | 2           | 7         | Did not control for total energy intake; attrition rate unclear                                                                   |
| European Prospective Investigation into Cancer (EPIC)-Norfolk (UK) | Patel et al.             | 4             | 0                 | 3           | 7         | Did not control for total energy intake or socioeconomic status                                                                   |
| Hunter Community Study (Australia)                                 | Alhazmi                  | 4             | 0                 | 1           | 5         | Did not control for or match on family history or total energy intake; self-report of type 2 diabetes only; 23% loss-to-follow up |
| ONCONUT Study (Italy)                                              | Pierucci                 | 4             | 0                 | 3           | 7         | Did not control for or match on socioeconomic status, smoking, or family history                                                  |
| Nurses' Health Study (USA)                                         | Q Sun 2007 – AJCN        | 4             | 2                 | 3           | 9         | Sampling from homogenous profession effectively controls for socioeconomic status                                                 |
| Nurses' Health study (USA)                                         | Q Sun 2007 – Circulation | 4             | 2                 | 3           | 9         | Sampling from homogenous profession effectively controls for socioeconomic status                                                 |
| Women's Health Initiative-Observational Study (USA)                | Matthan 2014             | 4             | 1                 | 3           | 8         | Did not control for total energy intake                                                                                           |
| Multiple Risk Factor Intervention Trial (USA)                      | Simon                    | 4             | 0                 | 3           | 7         | Did not control for or match on family history or total energy intake                                                             |

**eTable 6.** Risk of bias of included prospective nested case-control/case-cohort and retrospective case-control studies as assessed with the Newcastle-Ottawa Scale

| Study                                                                   | References    | Selection (4) | Comparability (2) | Outcome (3) | Total (9) | Comments                                                                                                                                                                  |
|-------------------------------------------------------------------------|---------------|---------------|-------------------|-------------|-----------|---------------------------------------------------------------------------------------------------------------------------------------------------------------------------|
| <b>Prospective case-cohort</b>                                          |               |               |                   |             |           |                                                                                                                                                                           |
| European Prospective Investigation into Cancer (EPIC)-InterAct (Europe) | Forouhi       | 4             | 1                 | 3           | 8         | Did not control for or match on family history                                                                                                                            |
| European Prospective Investigation into Cancer (EPIC)-Potsdam (Germany) | Kröger        | 4             | 1                 | 3           | 8         | Did not control for family history                                                                                                                                        |
| Melbourne Collaborative Cohort (Australia)                              | Hodge         | 4             | 2                 | 2           | 8         | Attrition rate unclear                                                                                                                                                    |
| <b>Retrospective case-control</b>                                       |               |               |                   |             |           |                                                                                                                                                                           |
| Costa Rica                                                              | Asilbekyan    | 4             | 1                 | 3           | 8         | Did not control for or match on family history                                                                                                                            |
| Costa Rica                                                              | Baylin        | 4             | 1                 | 3           | 8         | Did not control for or match on family history                                                                                                                            |
| Norway                                                                  | Biong         | 4             | 1                 | 3           | 8         | Did not control for or match on total energy intake                                                                                                                       |
| Costa Rica                                                              | Colon-Ramos   | 4             | 1                 | 3           | 8         | Did not control for match on family history                                                                                                                               |
| Iran                                                                    | Ghahremanpour | 3             | 0                 | 2           | 5         | Unclear if cases were consecutively sampled; did not control for or match on age, total energy intake, socioeconomic status, or family history                            |
| Portugal                                                                | Lopes 1998    | 4             | 1                 | 2           | 7         | Did not control for match on family history; differential participation rates (85% of approached cases vs. 70% of approached controls)                                    |
| Portugal                                                                | Lopes 2007    | 4             | 1                 | 3           | 8         | Overall low participation rate for adipose tissue biopsies, but similar in both cases and controls (16%); controls with biopsies were older, and more educated than cases |
| North Portugal                                                          | Monteiro      | 4             | 1                 | 3           | 8         | Did not control for or match on socioeconomic status                                                                                                                      |
| South Korea                                                             | Park          | 1             | 0                 | 2           | 3         | Catchment area of hospital serving cases and control sampling frame unclear; did not control for or match on socioeconomic status or total energy intake                  |
| Eastern Finland                                                         | Salonen       | 4             | 0                 | 2           | 6         | Did not control for or match on socioeconomic status or total energy intake                                                                                               |
| South Korea                                                             | Suh           | 4             | 0                 | 2           | 6         | Did not control for or match on socioeconomic status or family history                                                                                                    |
| China                                                                   | L Sun 2011    | 3             | 0                 | 2           | 5         | Source of cases unclear; did not control for or match on socioeconomic status, smoking, or total energy intake; participation rates in cases vs. controls unclear;        |
| Paupa New Guinea                                                        | Hodge         | 4             | 0                 | 2           | 6         | Did not control for or match on smoking or family history; unclear if events formally adjudicated                                                                         |

**eTable 6.** Risk of bias of included prospective nested case-control/case-cohort and retrospective case-control studies as assessed with the Newcastle-Ottawa Scale

| Study                                    | References    | Selection (4) | Comparability (2) | Outcome (3) | Total (9) | Comments                                                                                                                                          |
|------------------------------------------|---------------|---------------|-------------------|-------------|-----------|---------------------------------------------------------------------------------------------------------------------------------------------------|
| <b><i>Retrospective case-control</i></b> |               |               |                   |             |           |                                                                                                                                                   |
| Rotterdam                                | van de Vijver | 3             | 0                 | 3           | 6         | Sources of controls unclear; did not control for or match on socioeconomic status or family history                                               |
| EURAMIC                                  | Aro           | 3             | 0                 | 2           | 5         | Some controls were hospital controls or friends of cases; did not control for or match on socioeconomic status or family history, or total energy |
| United States                            | Block         | 2             | 2                 | 2           | 6         | Source of cases unclear, but used hospital controls                                                                                               |
| Norway                                   | Pedersen      | 2             | 2                 | 3           | 7         | Catchement area of cases unclear; friend controls                                                                                                 |
| Jordan                                   | Mashal        | 2             | 0                 | 2           | 4         | Unclear catchement area of cases; control selection not described; did not control for or match on total energy intake or smoking                 |
| Adelaide                                 | Clifton       | 4             | 1                 | 2           | 7         | Did not match on or control for family history or smoking                                                                                         |

*Multiple publications from a single cohort (e.g. Nurses' Health Study, Health Professionals Follow-up Study, Malmö Diet and Cancer Study) were each rated independently because they measured different exposures or outcomes in each publication.*

**eTable 7. Subgroup Analyses: Saturated fat and CHD Mortality (cohort studies)**

| <b>Continent</b>                                      | <b>Studies</b> | <b>Events</b> | <b>Total</b> | <b>RR</b>         | <b>I<sup>2</sup></b> | <b>P<sub>Het</sub></b> | <b>P<sub>EM</sub></b> |
|-------------------------------------------------------|----------------|---------------|--------------|-------------------|----------------------|------------------------|-----------------------|
| Europe                                                | 5              | 1,017         | 37,370       | 1.09 (0.81, 1.48) | 79                   | 0.001                  | 0.586                 |
| Asia                                                  | 2              | 1,098         | 8,961        | 0.86 (0.55, 1.35) | 75                   | 0.044                  |                       |
| America                                               | 8              | 855           | 53,528       | 1.35 (1.04, 1.76) | 59                   | 0.017                  |                       |
| <b>Baseline Year</b>                                  |                |               |              |                   |                      |                        |                       |
| <1976                                                 | 7              | 1,586         | 18,007       | 1.13 (0.91, 1.39) | 63                   | 0.014                  | 0.749                 |
| >=1976                                                | 8              | 1,384         | 39,948       | 1.22 (0.91, 1.63) | 77                   | <0.001                 |                       |
| <b>Follow-up</b>                                      |                |               |              |                   |                      |                        |                       |
| <15 y                                                 | 7              | 1,139         | 83,549       | 1.39 (0.87, 2.25) | 81                   | <0.001                 | 0.465                 |
| ≥15 y                                                 | 8              | 1,831         | 18,118       | 1.10 (0.95, 1.26) | 52                   | 0.041                  |                       |
| <b>Typical age</b>                                    |                |               |              |                   |                      |                        |                       |
| <60 y                                                 | 10             | 1,259         | 68,275       | 1.28 (1.04, 1.59) | 72                   | <0.001                 | 0.183                 |
| >=60                                                  | 5              | 1,711         | 33,437       | 0.93 (0.72, 1.21) | 55                   | 0.07                   |                       |
| <b>Sex</b>                                            |                |               |              |                   |                      |                        |                       |
| Men                                                   | 9              | 2,639         | 79,715       | 1.03 (0.88, 1.21) | 60                   | 0.010                  | 0.496                 |
| Women                                                 | 1              | 56            | 1,451        | 1.40 (1.09, 1.79) | -                    | -                      |                       |
| Mixed                                                 | 5              | 275           | 17,907       | 1.15 (0.97, 1.36) | 75                   | 0.003                  |                       |
| <b>Events</b>                                         |                |               |              |                   |                      |                        |                       |
| <100                                                  | 8              | 500           | 21,084       | 1.39 (1.03, 1.88) | 73                   | 0.001                  | 0.177                 |
| ≥100                                                  | 7              | 2,470         | 80,628       | 1.01 (0.82, 1.23) | 66                   | 0.007                  |                       |
| <b>Smoking Prevalence (not reported in 4 reports)</b> |                |               |              |                   |                      |                        |                       |
| <25%                                                  | 5              | 489           | 60,255       | 1.64 (1.17, 2.31) | 39                   | 0.162                  | 0.150                 |
| >=25%                                                 | 6              | 1,058         | 28,497       | 1.05 (0.78, 1.41) | 76                   | 0.001                  |                       |
| <b>Typical Diet Saturated Fat</b>                     |                |               |              |                   |                      |                        |                       |
| <14%                                                  | 7              | 1,581         | 67,678       | 1.36 (0.92, 2.01) | 75                   | 0.001                  | 0.172                 |
| >=14%                                                 | 8              | 1,389         | 34,034       | 1.10 (0.91, 1.33) | 69                   | 0.002                  |                       |
| <b>Energy adjusted</b>                                |                |               |              |                   |                      |                        |                       |
| No                                                    | 7              | 1,672         | 26,419       | 1.12 (0.95, 1.33) | 66                   | 0.007                  | 0.844                 |
| Yes                                                   | 8              | 1,348         | 75,293       | 1.24 (0.84, 1.83) | 76                   | <0.001                 |                       |
| <b>Exposure assessment</b>                            |                |               |              |                   |                      |                        |                       |
| 24-h recall                                           | 4              | 230           | 7,124        | 1.41 (0.71, 2.80) | 77                   | 0.005                  | 0.825                 |
| FFQ                                                   | 7              | 2,161         | 89,205       | 1.08 (0.86, 1.36) | 78                   | <0.001                 |                       |
| 7-d diet record                                       | 1              | 71            | 501          | 1.72 (0.90, 3.30) | -                    | -                      |                       |
| 28-d interview                                        | 1              | 215           | 1,900        | 1.11 (0.91, 1.36) | -                    | -                      |                       |
| Diet history, >1 but <7 d                             | 2              | 293           | 2,982        | 1.17 (0.81, 1.70) | 26                   | 0.245                  |                       |
| <b>Updated diet</b>                                   |                |               |              |                   |                      |                        |                       |
| Yes                                                   | 2              | 300           | 44,258       | 1.72 (1.14, 2.59) | 0                    | 1.000                  | 0.242                 |
| No                                                    | 13             | 2,670         | 57,484       | 1.10 (0.93, 1.31) | 71                   | <0.001                 |                       |
| <b>Study Risk of Bias (N-O S Score)</b>               |                |               |              |                   |                      |                        |                       |
| <7                                                    | 4              | 422           | 17,609       | 1.47 (1.07, 2.02) | 64                   | 0.039                  | 0.173                 |
| >=7                                                   | 11             | 2,548         | 84,103       | 1.05 (0.86, 1.28) | 69                   | <0.001                 |                       |
| <b>Adjusted for TC or LDL-C</b>                       |                |               |              |                   |                      |                        |                       |
| Yes                                                   | 9              | 1,882         | 63,841       | 1.17 (0.93, 1.47) | 68                   | 0.002                  | 0.972                 |
| No                                                    | 6              | 1,088         | 37,871       | 1.15 (0.86, 1.54) | 76                   | 0.001                  |                       |
| <b>Adjusted for BP</b>                                |                |               |              |                   |                      |                        |                       |
| Yes                                                   | 7              | 2,164         | 37,549       | 0.97 (0.74, 1.28) | 71                   | 0.002                  | 0.147                 |
| No                                                    | 8              | 806           | 64,163       | 1.32 (1.07, 1.63) | 65                   | 0.005                  |                       |

**Studies**= number of studies; **Events**= number of events; **total**= total number of participants; **RR**= most-adjusted relative risk estimate; **I<sup>2</sup>**= proportion of heterogeneity within that subgroup due to between-studies (vs. between subgroup) heterogeneity; **P<sub>het</sub>**= Cochran's Q test for presence of heterogeneity (significant at P<0.10); **P<sub>EM</sub>**= test for between-subgroups difference in effect size ("effect modification")



**eTable 8. Subgroup Analyses: Saturated fat and CVD Mortality (cohort studies)**

| <b>Continent</b>                        | <b>Studies</b> | <b>Events</b> | <b>Total</b> | <b>RR</b>         | <b>I<sup>2</sup></b> | <b>P<sub>Het</sub></b> | <b>P<sub>EM</sub></b> |
|-----------------------------------------|----------------|---------------|--------------|-------------------|----------------------|------------------------|-----------------------|
| Europe                                  | 2              | 339           | 28,098       | 0.78 (0.47, 1.29) | 27                   | 0.240                  | 0.429                 |
| Asia                                    | 3              | 3,453         | 62,403       | 1.00 (0.87, 1.15) | 20                   | 0.287                  |                       |
| <b>Baseline Year</b>                    |                |               |              |                   |                      |                        |                       |
| <1990                                   | 3              | 3,453         | 62,403       | 1.00 (0.87, 1.15) | 20                   | 0.287                  | 0.429                 |
| >=1990                                  | 2              | 339           | 28,098       | 0.78 (0.47, 1.29) | 27                   | 0.240                  |                       |
| <b>Follow-up</b>                        |                |               |              |                   |                      |                        |                       |
| <15 y                                   | 2              | 339           | 28,098       | 0.78 (0.47, 1.29) | 27                   | 0.240                  | 0.429                 |
| ≥15 y                                   | 3              | 3,453         | 62,403       | 1.00 (0.87, 1.15) | 20                   | 0.287                  |                       |
| <b>Typical age</b>                      |                |               |              |                   |                      |                        |                       |
| <60 y                                   | 2              | 339           | 28,098       | 0.78 (0.47, 1.29) | 27                   | 0.240                  | 0.429                 |
| ≥60 y                                   | 3              | 3,453         | 62,403       | 1.00 (0.87, 1.15) | 20                   | 0.287                  |                       |
| <b>Sex</b>                              |                |               |              |                   |                      |                        |                       |
| Men                                     | 2              | 1,665         | 21,450       | 1.04 (0.89, 1.21) | 0                    | 0.670                  | 0.763                 |
| Women                                   | 2              | 1,825         | 46,620       | 0.83 (0.49, 1.41) | 55                   | 0.096                  |                       |
| Mixed                                   | 1              | 60            | 3,731        | 0.58 (0.28, 1.20) | -                    | -                      |                       |
| <b>Events</b>                           |                |               |              |                   |                      |                        |                       |
| <250                                    | 3              | 399           | 31,829       | 0.74 (0.52, 1.06) | 0                    | 0.375                  | 0.098                 |
| ≥250                                    | 2              | 3,393         | 58,672       | 1.02 (0.89, 1.24) | 0                    | 0.618                  |                       |
| <b>Smoking Prevalence</b>               |                |               |              |                   |                      |                        |                       |
| <25%                                    | 0              | 0             | 0            | -                 | -                    | -                      | -                     |
| ≥25%                                    | 5              | 3,792         | 90,501       | 0.97 (0.84, 1.12) | 19                   | 0.290                  |                       |
| <b>Typical Diet Saturated Fat</b>       |                |               |              |                   |                      |                        |                       |
| <14%                                    | 3              | 3,453         | 62,403       | 1.00 (0.87, 1.15) | 20                   | 0.287                  | 0.429                 |
| ≥14%                                    | 2              | 339           | 28,098       | 0.78 (0.47, 1.29) | 27                   |                        |                       |
| <b>Energy adjusted</b>                  |                |               |              |                   |                      |                        |                       |
| No                                      | 3              | 399           | 31,829       | 0.74 (0.52, 1.06) | 0                    | 0.375                  | 0.098                 |
| Yes                                     | 2              | 3,393         | 58,672       | 1.02 (0.89, 1.24) | 0                    | 0.618                  |                       |
| <b>Exposure assessment</b>              |                |               |              |                   |                      |                        |                       |
| 24-h recall                             | 1              | 60            | 3,731        | 0.58 (0.28, 1.20) | -                    | -                      | 0.864                 |
| FFQ                                     | 2              | 3,393         | 58,672       | 1.02 (0.91, 1.14) | 0                    | 0.618                  |                       |
| 7-d diet record                         | 2              | 339           | 28,098       | 0.78 (0.47, 1.29) | 27                   | 0.240                  |                       |
| <b>Updated diet</b>                     |                |               |              |                   |                      |                        |                       |
| Yes                                     | 0              | 0             | 0            | -                 | -                    | -                      | -                     |
| No                                      | 5              | 3,792         | 90,501       | 0.97 (0.84, 1.12) | 19                   | 0.290                  |                       |
| <b>Study Risk of Bias (N-O S Score)</b> |                |               |              |                   |                      |                        |                       |
| <7                                      | 1              | 60            | 3,731        | 0.58 (0.28, 1.20) | -                    | -                      | 0.146                 |
| ≥7                                      | 4              | 3,732         | 86,770       | 1.00 (0.90, 1.12) | 0                    | 0.417                  |                       |
| <b>Adjusted for TC or LDL-C</b>         |                |               |              |                   |                      |                        |                       |
| Yes                                     | 1              | 60            | 3,731        | 0.58 (0.28, 1.20) | -                    | -                      | 0.146                 |
| No                                      | 4              | 3,732         | 86,770       | 1.00 (0.90, 1.12) | 0                    | 0.417                  |                       |
| <b>Adjusted for BP</b>                  |                |               |              |                   |                      |                        |                       |
| Yes                                     | 0              | 0             | 0            | -                 | -                    | -                      | -                     |
| No                                      | 5              | 3,792         | 90,501       | 0.97 (0.84, 1.12) | 19                   | 0.290                  |                       |

**Studies**= number of studies; **Events**= number of events; **total**= total number of participants; **RR**= most-adjusted relative risk estimate; **I<sup>2</sup>**= proportion of heterogeneity within that subgroup due to between-studies (vs. between subgroup) heterogeneity; **P<sub>het</sub>**= Cochran's Q test for presence of heterogeneity (significant at P<0.10); **P<sub>EM</sub>**= test for between-subgroups difference in effect size ("effect modification")

**eTable 9. Subgroup Analyses: Saturated fat and total CHD (cohort studies)**

| <b>Continent</b>                                      | <b>Studies</b> | <b>Events</b> | <b>Total</b> | <b>RR</b>         | <b>I<sup>2</sup></b> | <b>P<sub>Het</sub></b> | <b>P<sub>EM</sub></b> |
|-------------------------------------------------------|----------------|---------------|--------------|-------------------|----------------------|------------------------|-----------------------|
| Asia                                                  | 1              | 610           | 81,931       | 1.39 (0.93, 2.08) | -                    | -                      | 0.379                 |
| America                                               | 8              | 3,751         | 131,227      | 1.05 (0.93, 1.18) | 36                   | 0.143                  |                       |
| Europe                                                | 8              | 2,022         | 54,258       | 1.07 (0.88, 1.31) | 57                   | 0.024                  |                       |
| <b>Baseline Year</b>                                  |                |               |              |                   |                      |                        |                       |
| <1983                                                 | 9              | 2,761         | 55,454       | 1.08 (0.92, 1.26) | 53                   | 0.029                  | 0.779                 |
| >=1983                                                | 8              | 3,622         | 211,962      | 1.04 (0.91, 1.20) | 46                   | 0.074                  |                       |
| <b>Follow-up</b>                                      |                |               |              |                   |                      |                        |                       |
| <15 y                                                 | 11             | 4,159         | 219,177      | 1.03 (0.93, 1.16) | 45                   | 0.051                  | 0.504                 |
| ≥15 y                                                 | 6              | 2,224         | 48,239       | 1.14 (0.89, 1.45) | 56                   | 0.043                  |                       |
| <b>Typical age (unable to split for 1 study)</b>      |                |               |              |                   |                      |                        |                       |
| <60 y                                                 | 10             | 4,770         | 238,807      | 1.14 (1.00, 1.31) | 47                   | 0.048                  | 0.017                 |
| ≥60 y                                                 | 6              | 1,177         | 25,671       | 0.92 (0.82, 1.03) | 0                    | 0.488                  |                       |
| <b>Sex</b>                                            |                |               |              |                   |                      |                        |                       |
| Men                                                   | 10             | 2,354         | 75,919       | 0.97 (0.87, 1.09) | 22                   | 0.240                  | 0.320                 |
| Women                                                 | 4              | 2,075         | 78,530       | 1.26 (0.97, 1.62) | 64                   | 0.040                  |                       |
| Mixed                                                 | 3              | 1,954         | 112,967      | 1.09 (0.89, 1.33) | 22                   | 0.276                  |                       |
| <b>Events</b>                                         |                |               |              |                   |                      |                        |                       |
| <150                                                  | 10             | 971           | 40,209       | 1.13 (0.97, 1.32) | 53                   | 0.025                  | 0.076                 |
| ≥150                                                  | 7              | 5,412         | 227,207      | 0.96 (0.87, 1.06) | 0                    | 0.486                  |                       |
| <b>Smoking Prevalence (not reported in 8 studies)</b> |                |               |              |                   |                      |                        |                       |
| <25%                                                  | 3              | 1,490         | 158,562      | 1.17 (0.97, 1.41) | 35                   | 0.217                  | 0.149                 |
| ≥25%                                                  | 6              | 4,761         | 108,168      | 0.99 (0.87, 1.13) | 37                   | 0.164                  |                       |
| <b>Typical Diet Saturated Fat</b>                     |                |               |              |                   |                      |                        |                       |
| <14%                                                  | 7              | 4,148         | 212,345      | 1.06 (0.93, 1.21) | 33                   | 0.176                  | 0.988                 |
| ≥14%                                                  | 10             | 2,235         | 55,071       | 1.07 (0.92, 1.25) | 56                   | 0.017                  |                       |
| <b>Energy adjusted</b>                                |                |               |              |                   |                      |                        |                       |
| No                                                    | 2              | 929           | 28,610       | 0.98 (0.77, 1.24) | 0                    | 0.354                  | 0.721                 |
| Yes                                                   | 15             | 5,454         | 238,806      | 1.06 (0.95, 1.19) | 52                   | 0.011                  |                       |
| <b>Exposure assessment</b>                            |                |               |              |                   |                      |                        |                       |
| 24-h recall                                           | 5              | 1,105         | 10,839       | 1.02 (0.86, 1.20) | 38                   | 0.166                  | 0.476                 |
| FFQ                                                   | 5              | 3,891         | 223,485      | 1.05 (0.88, 1.25) | 63                   | 0.028                  |                       |
| 7-d diet record                                       | 6              | 1,387         | 33,092       | 1.14 (0.91, 1.44) | 52                   | 0.053                  |                       |
| <b>Updated diet</b>                                   |                |               |              |                   |                      |                        |                       |
| Yes                                                   | 3              | 2,646         | 120,388      | 1.08 (0.90, 1.29) | 44                   | 0.169                  | 0.817                 |
| No                                                    | 14             | 3,737         | 147,028      | 1.06 (0.93, 1.19) | 48                   | 0.022                  |                       |
| <b>Study Risk of Bias (N-O S Score)</b>               |                |               |              |                   |                      |                        |                       |
| <7                                                    | 0              | 0             | 0            | -                 | -                    | -                      | -                     |
| ≥7                                                    | 17             | 6,383         | 256,416      | 1.06 (0.96, 1.18) | 47                   | 0.019                  |                       |
| <b>Adjusted for TC or LDL-C</b>                       |                |               |              |                   |                      |                        |                       |
| Yes                                                   | 5              | 1,529         | 80,382       | 1.11 (0.97, 1.26) | 37                   | 0.176                  | 0.361                 |
| No                                                    | 12             | 4,854         | 187,034      | 1.03 (0.90, 1.19) | 47                   | 0.037                  |                       |
| <b>Adjusted for BP</b>                                |                |               |              |                   |                      |                        |                       |
| Yes                                                   | 12             | 1,511         | 159,074      | 1.03 (0.92, 1.16) | 48                   | 0.030                  | 0.303                 |
| No                                                    | 5              | 4,872         | 108,342      | 1.14 (0.96, 1.36) | 24                   | 0.259                  |                       |

**Studies**= number of studies; **Events**= number of events; **total**= total number of participants; **RR**= most-adjusted relative risk estimate; **I<sup>2</sup>**= proportion of heterogeneity within that subgroup due to between-studies (vs. between subgroup) heterogeneity; **P<sub>Het</sub>**= Cochran's Q test for presence of heterogeneity (significant at P<0.10); **P<sub>EM</sub>**= test for between-subgroups difference in effect size ("effect modification")

**eTable 10. Subgroup Analyses: Saturated fat and ischemic stroke (cohort studies)**

| <b>Continent</b>                                      | <b>Studies</b> | <b>Events</b> | <b>Total</b> | <b>RR</b>         | <b>I<sup>2</sup></b> | <b>P<sub>Het</sub></b> | <b>P<sub>EM</sub></b> |
|-------------------------------------------------------|----------------|---------------|--------------|-------------------|----------------------|------------------------|-----------------------|
| Asia                                                  | 5              | 2,438         | 98,005       | 0.82 (0.69, 0.98) | 0                    | 0.509                  | 0.138                 |
| America                                               | 7              | 2,569         | 187,280      | 1.09 (0.88, 1.34) | 72                   | 0.001                  |                       |
| Europe                                                | 3              | 1,219         | 53,805       | 1.11 (0.95, 1.30) | 0                    | 0.612                  |                       |
| <b>Baseline Year</b>                                  |                |               |              |                   |                      |                        |                       |
| <1978                                                 | 7              | 1,336         | 22,575       | 0.90 (0.72, 1.12) | 56                   | 0.033                  | 0.183                 |
| >=1978                                                | 8              | 4,890         | 316,515      | 1.10 (0.92, 1.33) | 62                   | 0.010                  |                       |
| <b>Follow-up</b>                                      |                |               |              |                   |                      |                        |                       |
| <15 y                                                 | 7              | 4,978         | 313,896      | 1.06 (0.95, 1.19) | 3                    | 0.405                  | 0.419                 |
| ≥15 y                                                 | 8              | 1,080         | 21,324       | 0.94 (0.73, 1.21) | 75                   | <0.0001                |                       |
| <b>Typical age (unable to split for 3 studies)</b>    |                |               |              |                   |                      |                        |                       |
| <60 y                                                 | 9              | 3,817         | 133,506      | 0.96 (0.80, 1.17) | 74                   | <0.0001                | 0.529                 |
| ≥60 y                                                 | 3              | 395           | 23,601       | 1.12 (0.91, 1.39) | 0                    | 0.699                  |                       |
| <b>Sex</b>                                            |                |               |              |                   |                      |                        |                       |
| Men                                                   | 8              | 1,892         | 108,550      | 0.94 (0.78, 1.12) | 50                   | 0.053                  | 0.771                 |
| Women                                                 | 1              | 1,049         | 87,025       | 1.16 (0.90, 1.50) | -                    | -                      |                       |
| Mixed                                                 | 6              | 3,285         | 143,515      | 1.08 (0.82, 1.40) | 72                   | 0.003                  |                       |
| <b>Events</b>                                         |                |               |              |                   |                      |                        |                       |
| <300                                                  | 8              | 1,084         | 24,409       | 0.93 (0.66, 1.31) | 74                   | <0.0001                | 0.477                 |
| ≥300                                                  | 7              | 5,142         | 314,681      | 1.04 (0.99, 1.10) | 0                    | 0.425                  |                       |
| <b>Smoking Prevalence (not reported in 3 studies)</b> |                |               |              |                   |                      |                        |                       |
| <25%                                                  | 3              | 2,562         | 171,954      | 1.21 (0.73, 2.01) | 86                   | 0.001                  | 0.347                 |
| ≥25%                                                  | 9              | 3,225         | 151,569      | 1.01 (0.89, 1.15) | 45                   | 0.068                  |                       |
| <b>Typical Diet Saturated Fat</b>                     |                |               |              |                   |                      |                        |                       |
| <12%                                                  | 5              | 3,578         | 261,123      | 0.96 (0.76, 1.21) | 38                   | 0.171                  | 0.617                 |
| ≥12%                                                  | 9              | 2,648         | 77,967       | 1.04 (0.83, 1.29) | 70                   | 0.001                  |                       |
| <i>(not reported in 1 study)</i>                      |                |               |              |                   |                      |                        |                       |
| <b>Energy adjusted</b>                                |                |               |              |                   |                      |                        |                       |
| No                                                    | 4              | 1,072         | 41,888       | 0.94 (0.67, 1.33) | 59                   | 0.063                  | 0.643                 |
| Yes                                                   | 11             | 5,194         | 297,202      | 1.04 (0.90, 1.19) | 62                   | 0.004                  |                       |
| <b>Exposure assessment</b>                            |                |               |              |                   |                      |                        |                       |
| 24-h recall                                           | 4              | 649           | 11,651       | 0.78 (0.55, 1.11) | 46                   | 0.133                  | 0.060                 |
| FFQ                                                   | 8              | 4,453         | 293,158      | 0.99 (0.87, 1.14) | 22                   | 0.253                  |                       |
| 7-d diet record                                       | 1              | 648           | 28,098       | 1.22 (0.91, 1.64) | -                    | -                      |                       |
| Biomarker (phospholipid FA)                           | 2              | 476           | 6,183        | 1.33 (0.79, 2.25) | 91                   | 0.001                  |                       |
| <b>Updated diet</b>                                   |                |               |              |                   |                      |                        |                       |
| Yes                                                   | 6              | 4,322         | 283,129      | 1.03 (0.89, 1.18) | 19                   | 0.295                  | 0.838                 |
| No                                                    | 10             | 1,904         | 55,961       | 1.00 (0.82, 1.22) | 69                   | 0.001                  |                       |
| <b>Study Risk of Bias (N-O S Score)</b>               |                |               |              |                   |                      |                        |                       |
| <7                                                    | 3              | 2,307         | 87,976       | 0.92 (0.73, 1.15) | 63                   | 0.066                  | 0.358                 |
| ≥7                                                    | 12             | 3,919         | 251,114      | 1.06 (0.89, 1.26) | 60                   | 0.004                  |                       |
| <b>Adjusted for TC or LDL-C</b>                       |                |               |              |                   |                      |                        |                       |
| Yes                                                   | 6              | 2,352         | 187,655      | 1.04 (0.95, 1.13) | 8                    | 0.367                  | 0.860                 |
| No                                                    | 9              | 3,874         | 151,435      | 0.99 (0.79, 1.25) | 72                   | <0.0001                |                       |
| <b>Adjusted for BP</b>                                |                |               |              |                   |                      |                        |                       |
| Yes                                                   | 13             | 4,119         | 253,288      | 1.00 (0.89, 1.12) | 38                   | 0.078                  | 0.378                 |
| No                                                    | 2              | 2,107         | 83,695       | 1.21 (0.58, 2.53) | 93                   | <0.0001                |                       |

**Studies**= number of studies; **Events**= number of events; **total**= total number of participants; **RR**= most-adjusted relative risk estimate; **I<sup>2</sup>**= proportion of heterogeneity within that subgroup due to between-studies (vs. between subgroup) heterogeneity; **P<sub>het</sub>**= Cochran's Q test for presence of heterogeneity (significant at P<0.10); **P<sub>EM</sub>**= test for between-subgroups difference in effect size ("effect modification")

**eTable 11.** Characteristics of included prospective cohort studies of trans fatty acids and health outcomes.

| Source (Country)                                                             | Age    | Sex (% Men) | No. of Participants | No. of Events                                 | Follow-up (y) | Exposures assessed                                                                                                                                   | Exposure contrast                          | Outcome validation                                                                                     | Adjustment for confounders                                                                                                                                                                                            | NOS score | Funding                              |
|------------------------------------------------------------------------------|--------|-------------|---------------------|-----------------------------------------------|---------------|------------------------------------------------------------------------------------------------------------------------------------------------------|--------------------------------------------|--------------------------------------------------------------------------------------------------------|-----------------------------------------------------------------------------------------------------------------------------------------------------------------------------------------------------------------------|-----------|--------------------------------------|
| Willett et al., 1993; United States (Nurses' Health Study I)                 | 34-59  | 0           | 69,181              | 356 CHD                                       | 8             | Total trans fatty acid; vegetable <i>trans</i> ; animal <i>trans</i> (validated FFQ)                                                                 | Q5 vs. Q1 (5.7 vs. 2.4 g/d)                | self report; confirmed by medical record review; national death index                                  | Age, smoking, BMI, hypertension, alcohol intake, menopausal status, PMH use, energy intake, dietary lipids, family history of MI <60, multivitamin use                                                                | 9         | National Institutes of Health (U.S.) |
| Ascherio et al., 1996; United States (Health Professionals' Follow-up Study) | 40-75  | 100         | 43,757              | 734 total MI; 229 CHD deaths                  | 6             | Total <i>trans</i> fatty acids (validated FFQ)                                                                                                       | Q5 vs. Q1 (4.3 to 1.5 g/d)                 | Self report; confirmed by medical record review, deaths confirmed by next of kin; national death index | Age, BMI, smoking, alcohol, physical activity, history of HTN/ high blood cholesterol, family history of MI <60; profession, dietary fiber, energy                                                                    | 9         | National Institutes of Health (U.S.) |
| Oh et al., 2004; United States (Nurses' Health Study I)                      | 34-59  | 0           | 78,778              | 1766 CHD; 1241 non-fatal MI and 525 CHD death | 20            | Total <i>trans</i> fatty acids (validated FFQ)                                                                                                       | Q5 vs. Q1 (2.8 vs. 1.3% energy)            | self report; confirmed by medical record review; national death index                                  | Age, BMI, smoking, alcohol, parental history of MI, hypertension, menopausal status and hormone use, aspirin use, multivitamin use, vitamin E supplement use, physical activity, energy, protein, dietary cholesterol | 9         | National Institutes of Health (U.S.) |
| Oomen et al, 2001; Netherlands (Zutphen Elders' Study)                       | 71 (5) | 100         | 667                 | 49 Fatal CHD 98 Non-fatal MI                  | 6             | Total <i>trans</i> fatty acids; ruminant <i>trans</i> fatty acids; manufactured C18:1 <i>trans</i> ; other manufactured <i>trans</i> (validated FFQ) | Ruminant: T3 vs. T1 (6.4% vs. 2.4% energy) | self-report or hospital discharge data; confirmed by municipal registries                              | Age, total energy, BMI, smoking, alcohol, vitamin use, saturated fat, monounsaturated fat, polyunsaturated fat, dietary cholesterol, dietary fiber                                                                    | 7         | Netherlands Prevention Foundation    |

**eTable 11.** Characteristics of included prospective cohort studies of trans fatty acids and health outcomes.

| Source (Country)                                                           | Age   | Sex (% Men) | No. of Participants | No. of Events                                                       | Follow-up (y) | Exposures assessed                                                                                                                      | Exposure contrast                                                                                       | Outcome validation                                                                                                                      | Adjustment for confounders                                                                                                                                                                      | NOS score | Funding                                                  |
|----------------------------------------------------------------------------|-------|-------------|---------------------|---------------------------------------------------------------------|---------------|-----------------------------------------------------------------------------------------------------------------------------------------|---------------------------------------------------------------------------------------------------------|-----------------------------------------------------------------------------------------------------------------------------------------|-------------------------------------------------------------------------------------------------------------------------------------------------------------------------------------------------|-----------|----------------------------------------------------------|
| Pietinen et al., 1997; ( $\alpha$ -tocopherol and $\beta$ -carotene Study) | 50-69 | 100         | 21,930              | 1,399 Major coronary events: first non-fatal MI; 635 coronary death | 6             | All <i>trans</i> isomers from 16-22C: C16:1 <i>trans</i> ; C18:1 <i>trans</i> ; C18:2 <i>trans</i> ; C20:1 <i>trans</i> (validated FFQ) | Q4 vs. Q1: 3.9% vs. 0.9% energy<br>Q4 vs. Q1: 4.0% vs. 0.9% energy;<br>Per 2 g/d ( $\approx$ 1% energy) | National hospital discharge register diagnosis and obtained hospital and pathology reports; deaths through national population register | Age, treatment group, smoking, BMI, blood pressure, energy, alcohol, fiber, education, physical activity                                                                                        | 8         | National Cancer Institute (U.S.), Academy of Finland     |
| Xu et al., 2006; United States (Strong Heart Study)                        | 45-74 | 36          | 2,938               | 436 incident CHD; 298 non-fatal CHD + 138 fatal CHD                 | 7.2           | Total <i>trans</i> fatty acids (24-hour recall)                                                                                         | $\approx$ 4.0 vs. 2.0% energy                                                                           | Annual mortality and morbidity surveillance or at 3 <sup>rd</sup> examination; confirmed by medical records                             | Sex, age, study center, diabetes, BMI, HDL-C, LDL-C, triacylglycerol, smoking, alcohol, hypertension, dietary protein, total energy                                                             | 7         | National Heart, Lung and Blood Institute (U.S.)          |
| Howard et al., 2006; United States (Womens' Health Initiative RCT)         | 50-79 | 0           | 31,258              | 146 major CHD event                                                 | 1             | Total <i>trans</i> fatty acids (validated FFQ)                                                                                          | $\approx$ 2.5% energy in control arm vs. <1.1% energy in intervention arm                               | Hospital records; death certificates                                                                                                    | Age, baseline CHD, HRT, randomization, BMI, hypertension, dyslipidemia, smoking, diabetes, physical activity, energy expenditure, ethnicity, education, income, psychological stress            | 8         | National Heart, Lung and Blood Institute (U.S.)          |
| Jakobsen et al., 2007; Denmark (1914, 1936 cohorts; MONICA I & III)        | 30-71 | 50          | 3,686               | 374 total CHD                                                       | 18            | Ruminant <i>trans</i> fatty acids (7-day weighed food record)                                                                           | Per 0.5 g/d                                                                                             | record linkage to Causes of Death registry; review of medical files                                                                     | Energy, cohort, SBP, family history of MI, education, smoking, alcohol, % protein, % mono, % poly, dietary fiber, dietary cholesterol, industrially-produced TFA, % SFA, BMI, physical activity | 8         | Danish Heart Foundation; Danish Medical Research Council |

**eTable 11.** Characteristics of included prospective cohort studies of trans fatty acids and health outcomes.

| Source (Country)                                                       | Age    | Sex (% Men) | No. of Participants | No. of Events                                                                                                        | Follow-up (y) | Exposures assessed                                                                                                             | Exposure contrast                                                                                                                | Outcome validation                                                                                        | Adjustment for confounders                                                                                                                                                                                                                                                                | NOS score | Funding                                                          |
|------------------------------------------------------------------------|--------|-------------|---------------------|----------------------------------------------------------------------------------------------------------------------|---------------|--------------------------------------------------------------------------------------------------------------------------------|----------------------------------------------------------------------------------------------------------------------------------|-----------------------------------------------------------------------------------------------------------|-------------------------------------------------------------------------------------------------------------------------------------------------------------------------------------------------------------------------------------------------------------------------------------------|-----------|------------------------------------------------------------------|
| Laake et al., 2012; Norway (Norwegian Countries Study)                 | ≈40    | 50          | 71,464              | 11,190 total mortality; 3870 CVD death; 2383 CHD death; 732 cerebrovascular death; 243 sudden death of unknown cause | 26            | Partially hydrogenated vegetable oil <i>trans</i> , partially hydrogenated fish oil <i>trans</i> , ruminant <i>trans</i> (FFQ) | 5 categories (not quintiles; as % energy)<br>PHVO:<br>≥1.65 vs. <0.15<br>PHFiO<br>≥2.35 vs. <0.85<br>rTFA (%):<br>≥0.85 vs. <0.4 | Not stated                                                                                                | Age, sex, energy intake, SBP, BMI, smoking, education, SFA, unsaturated cis-FA, protein, cholesterol, and each type of TFA for the others                                                                                                                                                 | 6         | Throne–Holst Foundation for Nutrition Research (Marabou company) |
| Yaemsiri et al., 2012; United States (Womens' Health Initiative)       | 64 (7) | 0           | 87,025              | 1,049 ischemic stroke, 101 atherosclerotic stroke, 269 lacunar stroke, 244 cardioembolic stroke                      | 7.6           | Total trans fatty acids (validated FFQ)                                                                                        | Q4 vs. Q1<br>6.1 vs. 2.2 g/d                                                                                                     | Self report; adjudicated by local physicians and centrally by trained neurologists                        | Age, race, education, income, smoking, HRT use, physical activity, alcohol, history of CHD, history of A. Fib, history of diabetes, aspirin use, use of antihypertensives, use of cholesterol-lowering medication, BMI, SBP, total energy, vitamin E, fruits and vegetables intake, fiber | 8         | National Heart, Lung, and Blood Institute (U.S.)                 |
| He et al., 2003; United States (Health Professionals' Follow-up Study) | 40-75  | 100         | 43,732              | 725 total stroke; 455 ischemic stroke, 125 haemorrhagic stroke                                                       | 14            | Total trans fatty acids (validated FFQ)                                                                                        | Q5 vs. Q1<br>4.42 vs. 1.67 g/d                                                                                                   | Blind record review by MD; fatal stroke reported by next of kin corroborated against national death index | BMI, physical activity, history of hypertension, smoking status, aspirin use, alcohol, dietary potassium, dietary fiber, dietary vitamin E, fruits and vegetables, total energy intake, hypercholesterolemia at baseline, polyunsaturated, monounsaturated, and saturated fat             | 7         | National Institutes of Health (U.S.)                             |

**eTable 11.** Characteristics of included prospective cohort studies of trans fatty acids and health outcomes.

| Source (Country)                                                                                              | Age   | Sex (% Men) | No. of Participants | No. of Events                                                          | Follow-up (y) | Exposures assessed                                                    | Exposure contrast                                   | Outcome validation                                                 | Adjustment for confounders                                                                                                                                                                                                        | NOS score                | Funding                                                                                        |
|---------------------------------------------------------------------------------------------------------------|-------|-------------|---------------------|------------------------------------------------------------------------|---------------|-----------------------------------------------------------------------|-----------------------------------------------------|--------------------------------------------------------------------|-----------------------------------------------------------------------------------------------------------------------------------------------------------------------------------------------------------------------------------|--------------------------|------------------------------------------------------------------------------------------------|
| Knekt (personal communication 2013; <i>unpublished</i> ); Finnish Mobile Health Clinics                       | 40-69 | 50          | 3,980               | 519 fatal CHD                                                          | 17            | Total <i>trans</i> fatty acids ( <i>Validated dietary interview</i> ) | Q5 vs. Q1: 4.6 vs. 1.3 g/d (M); 3.4 vs. 0.9 g/d (W) | Cause of death registry using ICD-8                                | Age, lipids, blood pressure, BMI, MUFA, PUFA, SFA, smoking                                                                                                                                                                        | n/a                      | n/a                                                                                            |
| Robien (as reported by Bendsen et al., 2011; <i>unpublished</i> ); Iowa Womens' Health Study                  | 55-69 | 0           | 32,766              | 1,875 fatal CHD                                                        | 21            | Total <i>trans</i> fatty acids ( <i>validated FFQ</i> )               | Q5 vs. Q1 (1.5%E contrast)                          | Cause of Death Registry using ICD-9                                | Age, BMI, education, alcohol, dietary cholesterol, total energy, fiber, n-3 fatty acids, MUFA, protein, PUFA, SFA, physical activity, smoking, use of post-menopausal hormones                                                    | n/a                      | n/a                                                                                            |
| Kiage et al., 2013 and 2014; United States (Reasons for Geographical and Racial Differences in Stroke cohort) | ≈65   | 45          | 18,513              | 401 ischemic stroke events [2014]<br><br>1,572 all-cause deaths [2013] | 7             | Total <i>trans</i> fatty acids ( <i>validated FFQ</i> )               | Q5 vs. Q1<br><br>4.68 vs. 1.60 % energy             | Next-of-kin report, national death index, and adjudicated          | Sex, age, smoking, race, region, alcohol use, education, waist circumference, physical activity, diabetes, CHD, hypertension, stroke, heart failure, CKD, statin use, total energy, energy-adjusted SFA, MUFA, PUFA, protein, CHO | 7 [2014]<br><br>8 [2013] | National Institutes of Neurological Disorders and Stroke, National Institutes of Health (U.S.) |
| van Dam et al., 2002; United States (Health Professionals' Follow-up Study)                                   | 40-75 | 100         | 42,504              | 1,321 type 2 diabetes                                                  | 12            | Total <i>trans</i> fatty acids ( <i>validated FFQ</i> )               | Q5 vs. Q1<br><br>2.0 vs. 0.7% energy                | Self-report, confirmed by medical records, blinded study physician | Age, total energy, time, physical activity, smoking, alcohol, hypertension, hypercholesterolemia, family history, cereal fiber, magnesium, BMI                                                                                    | 8                        | National Institutes of Health (U.S.)                                                           |
| Meyer et al., 2001; United States (Iowa Womens' Health Study)                                                 | 56-69 | 0           | 35,988              | 1,890 type 2 diabetes                                                  | 11            | Total <i>trans</i> fatty acids ( <i>validated FFQ</i> )               | Q5 vs. Q1<br><br>5.2 vs. 2.2 g/d                    | Self-report (only validated in subsample)                          | Age, total energy, WHR, BMI, physical activity, smoking, alcohol, education, marital status, residence area, use of HRT, magnesium, cereal fiber, SFA, MUFA, w-3 FA, cholesterol                                                  | 6                        | National Cancer Institute (U.S.)                                                               |

**eTable 11.** Characteristics of included prospective cohort studies of trans fatty acids and health outcomes.

| Source (Country)                                                                 | Age   | Sex (% Men) | No. of Participants | No. of Events                | Follow-up (y) | Exposures assessed                       | Exposure contrast                          | Outcome validation                                                                                   | Adjustment for confounders                                                                                                                                                                                 | NOS score | Funding                                                                                                                                    |
|----------------------------------------------------------------------------------|-------|-------------|---------------------|------------------------------|---------------|------------------------------------------|--------------------------------------------|------------------------------------------------------------------------------------------------------|------------------------------------------------------------------------------------------------------------------------------------------------------------------------------------------------------------|-----------|--------------------------------------------------------------------------------------------------------------------------------------------|
| Salmeron et al., 2001; United States (Nurses' Health Study)                      | 35-49 | 0           | 84,204              | 2,507 type 2 diabetes        | 14            | Total trans fatty acids (validated FFQ)  | Q5 vs. Q1<br><br>2.9 vs. 1.3% energy       | Self-report, confirmed by medical records, blinded study physician                                   | Age, BMI, time, smoking, family history of DM, alcohol, physical activity, protein (%), total energy, dietary cholesterol                                                                                  | 9         | National Institutes of Health (U.S.)                                                                                                       |
| Song et al., 2004; United States (Women's Health Study)                          | >45   | 0           | 37,309              | 1,558 type 2 diabetes        | 8.8           | Total trans fatty acids (validated FFQ)  | Q5 vs. Q1<br><br>3.7 vs. 1.1 g/d           | Self-report, MD confirmed in subsample                                                               | Age, BMI, total energy, smoking, exercise, alcohol, family history of DM, fiber, glycemic load, magnesium, total fat                                                                                       | 7         | National Institutes of Health (U.S.)                                                                                                       |
| Simila et al., 2012; Finland ( $\alpha$ -tocopherol and $\beta$ -carotene Study) | 50-69 | 100         | 25,943              | 1,098 type 2 diabetes        | 12            | Total trans fatty acids (validated FFQ)  | Replacement of 1% energy with carbohydrate | Registry of reimbursement for diabetes medications                                                   | Age, intervention, BMI, smoking, physical activity, coffee, total energy, protein, fat, SFA, MUFA, PUFA                                                                                                    | 8         | U.S. Public Health Services (U.S.)                                                                                                         |
| Mozaffarian et al., 2010; U.S. (Cardiovascular Health Study)                     | ≈75   | 45          | 3,736               | 304 incident type 2 diabetes | 14            | Trans-palmitoleate (plasma phospholipid) | 0.25% vs. 0.13% total FA                   | Assessed at annual study clinic visits by study physician                                            | Age, sex, race, education, enrollment site, smoking, waist, CHD, physical activity, alcohol use, % energy from carbohydrate, % energy from protein, red meat, whole-fat dairy, low-fat dairy, total energy | 9         | National Heart, Lung and Blood Institute, NIH Office of Dietary Supplements, National Institute of Neurological Diseases and Stroke (U.S.) |
| Mozaffarian et al., 2013; U.S. (MESA)                                            | 62    | 47          | 2,281               | 205 type 2 diabetes          | ≈5            | Trans-palmitoleate (plasma phospholipid) | 0.10% vs. 0.03 total FA                    | Study physicians determined presence of DM each 2y study visit based on fasting glucose (≥126 mg/dl) | Age, sex, race, education, field center, smoking, alcohol use, physical activity, BMI, waist circumference                                                                                                 | 9         | National Heart, Lung, and Blood Institute, NIH NIDDK, Harvard Bunge Fellowship Fund (U.S.)                                                 |



**eTable 11.** Characteristics of included prospective cohort studies of trans fatty acids and health outcomes.

| Source (Country)                                                                 | Age   | Sex (% Men) | No. of Participants                       | No. of Events                          | Follow-up (y) | Exposures assessed                                                                                            | Exposure contrast                                | Outcome validation                                                                                                                          | Adjustment for confounders                                                                                                                                                                                                      | NOS score | Funding                                                                                                                                                                 |
|----------------------------------------------------------------------------------|-------|-------------|-------------------------------------------|----------------------------------------|---------------|---------------------------------------------------------------------------------------------------------------|--------------------------------------------------|---------------------------------------------------------------------------------------------------------------------------------------------|---------------------------------------------------------------------------------------------------------------------------------------------------------------------------------------------------------------------------------|-----------|-------------------------------------------------------------------------------------------------------------------------------------------------------------------------|
| Chien et al., 2013; Japan (Chin-Shan)                                            | ≈60   | 47          | 3,602                                     | 568 deaths; 275 CVD events             | ≈10           | Total trans-fatty acids ( <i>Plasma</i> )                                                                     | 10.4% vs. 7.3% of total fat                      | Official death certificates verified by house-to-house visits                                                                               | Age, gender, BMI, smoking, drinking, marital status, education level, job and sports activity, hypertension, diabetes, LDL-C and HDL-C                                                                                          | 7         | National Science Council; National Taiwan University (Taiwan)                                                                                                           |
| Virtanen et al., 2014; Finland (Kuopio Ischemic Heart Disease Risk Factor Study) | 42-60 | 100         | 1,981                                     | 183 fatal and 382 non-fatal CHD events | 21.4          | Total trans fatty acids ( <i>4-day prospective diet record</i> )                                              | Q4 vs. Q1 (1.5 vs. 0.7% of energy)               | Link to national death registry; adjudicated according to ICD-9                                                                             | Age, examination year, energy intake, BMI, diabetes, hypertension, family history of CHD, pack-years of smoking, education, leisure-time physical activity, alcohol, fiber, % energy from protein, other fatty acids            | 9         | University of Eastern Finland                                                                                                                                           |
| Wang et al., 2015; USA; Cardiovascular Health Study                              | 74±5  | 74          | 4,207 (of which 2,919 had plasma PPL TFA) | 407 incident type 2 diabetes           | 20            | Total trans fatty acids (FFQ); t-16:1n9, t-18:1, c/t-18:2, t/c-18:2, t/t-18:2, t-16:1n7 ( <i>plasma PPL</i> ) | Q4 vs. Q1 Mean intake of total TFA = 3.7±1.3 g/d | Self-reported diagnosis by new use of insulin/hypoglycemic meds during f/u; elevated non-fasting glucose; or elevated 2-h glucose challenge | Age, sex, race, education, enrollment site, smoking, alcohol, physical activity, BMI, waist circumference, CVD, hypertension at baseline, coffee, red meat, fiber, glycemic load, PUFA, SFA, total energy, "healthy diet score" | 9         | National Heart, Lung, and Blood Institute (NHLBI); Office of Dietary Supplements; National Institutes of Neurological Disorders and Stroke; National Institute on Aging |

**eTable 11.** Characteristics of included prospective cohort studies of trans fatty acids and health outcomes.

| Source (Country)                                                                   | Age   | Sex (% Men) | No. of Participants | No. of Events                | Follow-up (y) | Exposures assessed                 | Exposure contrast               | Outcome validation                                                                                                                                                     | Adjustment for confounders                                                                                                                                                                                                                                                                                                     | NOS score | Funding                                                            |
|------------------------------------------------------------------------------------|-------|-------------|---------------------|------------------------------|---------------|------------------------------------|---------------------------------|------------------------------------------------------------------------------------------------------------------------------------------------------------------------|--------------------------------------------------------------------------------------------------------------------------------------------------------------------------------------------------------------------------------------------------------------------------------------------------------------------------------|-----------|--------------------------------------------------------------------|
| Santaren et al., 2014; USA; Insulin Resistance Atherosclerosis Study               | 40-60 | 55          | 659                 | 103 incident type 2 diabetes | 5             | Trans 16:1n7 ( <i>plasma PPL</i> ) | T3 vs. T1 (0.4 vs. 0.2 mol% FA) | Diabetes diagnosed on end-of-study visit using American Diabetes Association criteria for fasting or 2h-post challenge glucose, oral hypoglycemic agent or insulin use | Age, sex, ethnicity, study center, physical activity, smoking, alcohol, education, total energy, fruit and vegetables, red meat, soft drinks, fiber                                                                                                                                                                            | 8         | Dairy Farmers of Canada, National Heart, Lung, and Blood Institute |
| Yakoob et al., 2014; USA; Nurses' Health and Health Professionals Followup Studies | 30-75 | 50          | 3,347               | 254 incident type 2 diabetes | 14            | Trans 16:1n7 ( <i>plasma PPL</i> ) | Q4 vs. Q1 plasma FA biomarkers  | Self-report; validated by supplementary questionnaires on symptoms, diagnostic tests, and medical therapy                                                              | Age, race, month of blood collection, smoking, physical activity, alcohol, family history of t2dm and MI, menopausal status, fish, processed and unprocessed meats, fruits, vegetables, whole grains, coffee, sugar-sweetened beverages, glycemic load, dietary calcium, PUFA, trans fatty acids, total energy, and CVD status | 9         | American Heart Association, Founders Affiliate                     |

**eTable 12.** Characteristics of included prospective nested case-control and case-cohort of *trans* fatty acids and health outcomes.

| Source (Country)                                                                       | Age  | Sex (% Men) | No. Cases/ Participants [Case:Control] | Case definition                                                                                                                                                                                                                    | Control definition                                                                                                                                       | Follow-up (y) | Exposures assessed                                                                                                                                                                                                | Exposure contrast                                                                                                             | Outcome validation                                                                                                                                                                                            | Adjustment for confounders                                                                                                                                                                                                                                | NOS score | Funding                                                                                            |
|----------------------------------------------------------------------------------------|------|-------------|----------------------------------------|------------------------------------------------------------------------------------------------------------------------------------------------------------------------------------------------------------------------------------|----------------------------------------------------------------------------------------------------------------------------------------------------------|---------------|-------------------------------------------------------------------------------------------------------------------------------------------------------------------------------------------------------------------|-------------------------------------------------------------------------------------------------------------------------------|---------------------------------------------------------------------------------------------------------------------------------------------------------------------------------------------------------------|-----------------------------------------------------------------------------------------------------------------------------------------------------------------------------------------------------------------------------------------------------------|-----------|----------------------------------------------------------------------------------------------------|
| Lemaitre et al., 2006; USA; Cardiovascular Health Study ( <i>nested case-control</i> ) | 77±6 | 60          | 224/428 [1:1]                          | Fatal myocardial infarction or fatal events with chest pain within 72 hours of death; or had a history of chronic IHD. Myocardial infarction was defined on the basis of cardiac enzyme levels, chest pain, and serial ECG changes | Random CHS participants who did not experience a fatal IHD event and did not use fish oil supplements                                                    | 2-10          | Trans 18:1 (12 trans-18:1; 11 trans-18:1; 10 trans-18:1; and mix of 6 to 8 trans-18:1); Trans 18:2 (9 cis, 12 trans-18:2 and 9 trans, 12 cis 18:2); trans 16:1 (7-trans 16:1; 9-trans 16:1) (plasma phospholipid) | Interquintile range:<br>Total trans: 1.39%<br>Trans 16:1: 0.13%<br>Trans 18:2: 0.13%<br>Trans 18:1: >20th %ile vs. <20th %ile | Cardiologist reviewed all fatal IHD records, including hospital records; interviews with physicians, next-of-kin, and/or witnesses; death certificates; and autopsy reports to identify sudden cardiac deaths | Matching: gender, clinic site, entry cohort, age (±5y), time of blood draw (±90d), follow-up duration<br>Covariates: diabetes mellitus, education, smoking, congestive heart failure, stroke history, DHA+EPA                                             | 8         | National Heart, Lung and Blood Institute (USA); National Institute of Neurological Disorders (USA) |
| Sun et al., 2007; USA; Nurses' Health Study ( <i>nested case-control</i> )             | 61±6 | 0           | 166/493 [1:2]                          | CHD deaths were identified from autopsy reports, hospital records, or death certificates, Nonfatal MI by WHO criteria                                                                                                              | randomly selected with risk-set sampling (ie, controls were selected from the rest of the nondiseased participants at the time of diagnosis of the cases | 6             | Total <i>trans</i> , all C18:1 <i>trans</i> , all C18:2 <i>trans</i> (Erythrocyte)                                                                                                                                | Total <i>trans</i> : ~0.14%, all C18:1 <i>trans</i> : ~1.2%, all C18:2 <i>trans</i> : 0.37%                                   | Charts reviewed by MD blind to exposure status                                                                                                                                                                | Age, smoking, fasting status, time of blood draw, BMI, menopausal status, hormone use, physical activity, alcohol, parental history of MI <65, hypertension, hypercholesterolemia, diabetes, LC <i>n</i> -3 fatty acids and total <i>n</i> -6 fatty acids | 7         | National Institutes of Health (USA)                                                                |

**eTable 12.** Characteristics of included prospective nested case-control and case-cohort of *trans* fatty acids and health outcomes.

| Source (Country)                                                                  | Age  | Sex (% Men) | No. Cases/ Participants [Case:Control] | Case definition                                                                                                                                                                  | Control definition                                                                     | Follow-up (y) | Exposures assessed                                                                                                         | Exposure contrast                                                                                            | Outcome validation                                                                                                                             | Adjustment for confounders                                                                                                       | NOS score | Funding                                                                                                                                                                                                                        |
|-----------------------------------------------------------------------------------|------|-------------|----------------------------------------|----------------------------------------------------------------------------------------------------------------------------------------------------------------------------------|----------------------------------------------------------------------------------------|---------------|----------------------------------------------------------------------------------------------------------------------------|--------------------------------------------------------------------------------------------------------------|------------------------------------------------------------------------------------------------------------------------------------------------|----------------------------------------------------------------------------------------------------------------------------------|-----------|--------------------------------------------------------------------------------------------------------------------------------------------------------------------------------------------------------------------------------|
| Khaw et al., 2012; UK; EPIC-Norfolk (nested case-control)                         | 62±8 | 52          | 2424/7354 [1:2]                        | hospital admission and/or died with CHD as cause of death                                                                                                                        | Cohort members alive and free of known cardiovascular disease during follow-up to 2009 | 13            | Total trans, C16:1n9t, C18:1n9t (plasma phospholipid)                                                                      | % total fatty acids<br>Total trans: ~2.04%<br>Trans 18:1: ~1.67%<br>Trans 18:2: ~0.21%<br>Trans 16:1: ~0.17% | Deaths: National Health Service Central register; CHD events via medical record inspection                                                     | Age, sex, BMI, smoking, alcohol intake, physical activity, plasma vitamin C, social class, education, diabetes, SBP, cholesterol | 7         | Medical Research Council UK; Cancer Research UK                                                                                                                                                                                |
| Hodge et al., 2007; Australia; Melbourne Collaborative Cohort Study (case-cohort) | 55±8 | 44          | 364/3737 [1:10]                        | Self-reported type 2 diabetes 4 y. after baseline                                                                                                                                | Random sample of the cohort                                                            | 4             | Total trans (phospholipid and FFQ)                                                                                         | Plasma trans: 1.03% (cases); 0.81% (controls)<br>Plasma CLA: 0.30% (cases); 0.27% (controls)                 | Self-reported diabetes confirmed with person's family doctor (84% confirmed)                                                                   | Age, sex, country of birth, family history of DM, physical activity, alcohol, BMI, waist to hip ratio                            | 8         | VicHealth; The Cancer Council (Victoria); National Health and Medical Research Council                                                                                                                                         |
| Patel et al., 2010; UK; EPIC-Norfolk (nested case-control)                        | 64   | 53          | 199/184 [1.1:1]                        | self-report of diabetes or a diabetes medication on any of the follow-up health and lifestyle questionnaires; or diabetes medication brought to the follow-up health check visit | Randomly selected noncases from the entire EPIC Norfolk cohort at baseline             | 13            | Diet: total Trans (validated FFQ)<br>Biomarker: total trans, 16:1n-9t, 18:1n-9t (plasma PPL; and erythrocyte membrane PPL) | Diet and PPL: T3 vs. T1                                                                                      | Record linkage: general practice diabetes registers, hospital outpatient diabetes registers, and hospital admissions information for diabetes. | Age, sex, family history of DM, smoking, physical activity, alcohol                                                              | 8         | Medical Research Council UK and Cancer Research UK, European Union; Stroke Association; British Heart Foundation; the Department of Health; Food Standards Agency; Ministry of Agriculture, Fisheries and Food; Wellcome Trust |

**eTable 12.** Characteristics of included prospective nested case-control and case-cohort of *trans* fatty acids and health outcomes.

| Source (Country)                                                 | Age | Sex (% Men)           | No. Cases/ Participants [Case:Control] | Case definition                                                                                                                                                                  | Control definition                                                         | Follow-up (y) | Exposures assessed                                              | Exposure contrast             | Outcome validation                              | Adjustment for confounders                                                                                                      | NOS score | Funding                                                                                                                 |
|------------------------------------------------------------------|-----|-----------------------|----------------------------------------|----------------------------------------------------------------------------------------------------------------------------------------------------------------------------------|----------------------------------------------------------------------------|---------------|-----------------------------------------------------------------|-------------------------------|-------------------------------------------------|---------------------------------------------------------------------------------------------------------------------------------|-----------|-------------------------------------------------------------------------------------------------------------------------|
| Kröger et al. 2011; Germany; EPIC-Potsdam ( <i>case-cohort</i> ) | 53  | 58 cases; 39 controls | 673/2,787 [1:3]                        | self-report of diabetes or a diabetes medication on any of the follow-up health and lifestyle questionnaires; or diabetes medication brought to the follow-up health check visit | Randomly selected noncases from the entire EPIC Potsdam cohort at baseline | 7             | Total TFA, C16:1n-7t, C18:1n-9t+C18:1n7t (erythrocyte membrane) | Q5 vs. Q1 (0.94 vs. 0.54% FA) | Incident cases verified by diagnosing physician | Age, sex, BMI, waist, cycling, sports activity, education, coffee intake, smoking, alcohol intake, occupational activity, fiber | 8         | Federal Ministry of Science, Germany; European Union; German Cancer Aid; European Community; German Research Foundation |

**eTable 13.** Characteristics of included retrospective case-control studies of *trans* fatty acids and health outcomes.

| Source (Country)                                                                       | Age  | Sex (% Men) | No. Cases/ Participants [Case:Control] | Case definition                                                                                                                                                                                                                    | Control definition                                                                                                                                       | Follow-up (y) | Exposures assessed                                                                                                                                                                                                | Exposure contrast                                                                                                             | Outcome validation                                                                                                                                                                                            | Adjustment for confounders                                                                                                                                                                                                                                | NOS score | Funding                                                                                            |
|----------------------------------------------------------------------------------------|------|-------------|----------------------------------------|------------------------------------------------------------------------------------------------------------------------------------------------------------------------------------------------------------------------------------|----------------------------------------------------------------------------------------------------------------------------------------------------------|---------------|-------------------------------------------------------------------------------------------------------------------------------------------------------------------------------------------------------------------|-------------------------------------------------------------------------------------------------------------------------------|---------------------------------------------------------------------------------------------------------------------------------------------------------------------------------------------------------------|-----------------------------------------------------------------------------------------------------------------------------------------------------------------------------------------------------------------------------------------------------------|-----------|----------------------------------------------------------------------------------------------------|
| Lemaitre et al., 2006; USA; Cardiovascular Health Study ( <i>nested case-control</i> ) | 77±6 | 60          | 224/428 [1:1]                          | Fatal myocardial infarction or fatal events with chest pain within 72 hours of death; or had a history of chronic IHD. Myocardial infarction was defined on the basis of cardiac enzyme levels, chest pain, and serial ECG changes | Random CHS participants who did not experience a fatal IHD event and did not use fish oil supplements                                                    | 2-10          | Trans 18:1 (12 trans-18:1; 11 trans-18:1; 10 trans-18:1; and mix of 6 to 8 trans-18:1); Trans 18:2 (9 cis, 12 trans-18:2 and 9 trans, 12 cis 18:2); trans 16:1 (7-trans 16:1; 9-trans 16:1) (plasma phospholipid) | Interquintile range:<br>Total trans: 1.39%<br>Trans 16:1: 0.13%<br>Trans 18:2: 0.13%<br>Trans 18:1: >20th %ile vs. <20th %ile | Cardiologist reviewed all fatal IHD records, including hospital records; interviews with physicians, next-of-kin, and/or witnesses; death certificates; and autopsy reports to identify sudden cardiac deaths | Matching: gender, clinic site, entry cohort, age (±5y), time of blood draw (±90d), follow-up duration<br>Covariates: diabetes mellitus, education, smoking, congestive heart failure, stroke history, DHA+EPA                                             | 8         | National Heart, Lung and Blood Institute (USA); National Institute of Neurological Disorders (USA) |
| Sun et al., 2007; USA; Nurses' Health Study ( <i>nested case-control</i> )             | 61±6 | 0           | 166/493 [1:2]                          | CHD deaths were identified from autopsy reports, hospital records, or death certificates, Nonfatal MI by WHO criteria                                                                                                              | randomly selected with risk-set sampling (ie, controls were selected from the rest of the nondiseased participants at the time of diagnosis of the cases | 6             | Total <i>trans</i> , all C18:1 <i>trans</i> , all C18:2 <i>trans</i> (Erythrocyte)                                                                                                                                | Total <i>trans</i> : ~0.14%, all C18:1 <i>trans</i> : ~1.2%, all C18:2 <i>trans</i> : 0.37%                                   | Charts reviewed by MD blind to exposure status                                                                                                                                                                | Age, smoking, fasting status, time of blood draw, BMI, menopausal status, hormone use, physical activity, alcohol, parental history of MI <65, hypertension, hypercholesterolemia, diabetes, LC <i>n</i> -3 fatty acids and total <i>n</i> -6 fatty acids | 7         | National Institutes of Health (USA)                                                                |

**eTable 13.** Characteristics of included retrospective case-control studies of *trans* fatty acids and health outcomes.

| Source (Country)                                                                           | Age  | Sex (% Men) | No. Cases/ Participants [Case:Control] | Case definition                                                                                                                                                                  | Control definition                                                                     | Follow-up (y) | Exposures assessed                                                                                                                           | Exposure contrast                                                                                            | Outcome validation                                                                                                                             | Adjustment for confounders                                                                                                       | NOS score | Funding                                                                                                                                                                                                                        |
|--------------------------------------------------------------------------------------------|------|-------------|----------------------------------------|----------------------------------------------------------------------------------------------------------------------------------------------------------------------------------|----------------------------------------------------------------------------------------|---------------|----------------------------------------------------------------------------------------------------------------------------------------------|--------------------------------------------------------------------------------------------------------------|------------------------------------------------------------------------------------------------------------------------------------------------|----------------------------------------------------------------------------------------------------------------------------------|-----------|--------------------------------------------------------------------------------------------------------------------------------------------------------------------------------------------------------------------------------|
| Khaw et al., 2012; UK; EPIC-Norfolk ( <i>nested case-control</i> )                         | 62±8 | 52          | 2424/7354 [1:2]                        | hospital admission and/or died with CHD as cause of death                                                                                                                        | Cohort members alive and free of known cardiovascular disease during follow-up to 2009 | 13            | Total trans, C16:1n9t, C18:1n9t ( <i>plasma phospholipid</i> )                                                                               | % total fatty acids<br>Total trans: ~2.04%<br>Trans 18:1: ~1.67%<br>Trans 18:2: ~0.21%<br>Trans 16:1: ~0.17% | Deaths: National Health Service Central register; CHD events via medical record inspection                                                     | Age, sex, BMI, smoking, alcohol intake, physical activity, plasma vitamin C, social class, education, diabetes, SBP, cholesterol | 7         | Medical Research Council UK; Cancer Research UK                                                                                                                                                                                |
| Hodge et al., 2007; Australia; Melbourne Collaborative Cohort Study ( <i>case-cohort</i> ) | 55±8 | 44          | 364/3737 [1:10]                        | Self-reported type 2 diabetes 4 y. after baseline                                                                                                                                | Random sample of the cohort                                                            | 4             | Total trans ( <i>phospholipid and FFQ</i> )                                                                                                  | Plasma trans: 1.03% (cases); 0.81% (controls)<br>Plasma CLA: 0.30% (cases); 0.27% (controls)                 | Self-reported diabetes confirmed with person's family doctor (84% confirmed)                                                                   | Age, sex, country of birth, family history of DM, physical activity, alcohol, BMI, waist to hip ratio                            | 8         | VicHealth; The Cancer Council (Victoria); National Health and Medical Research Council                                                                                                                                         |
| Patel et al., 2010; UK; EPIC-Norfolk ( <i>nested case-control</i> )                        | 64   | 53          | 199/184 [1.1:1]                        | self-report of diabetes or a diabetes medication on any of the follow-up health and lifestyle questionnaires; or diabetes medication brought to the follow-up health check visit | Randomly selected noncases from the entire EPIC Norfolk cohort at baseline             | 13            | Diet: total Trans ( <i>validated FFQ</i> )<br>Biomarker: total trans, 16:1n-9t, 18:1n-9t ( <i>plasma PPL; and erythrocyte membrane PPL</i> ) | Diet and PPL: T3 vs. T1                                                                                      | Record linkage: general practice diabetes registers, hospital outpatient diabetes registers, and hospital admissions information for diabetes. | Age, sex, family history of DM, smoking, physical activity, alcohol                                                              | 8         | Medical Research Council UK and Cancer Research UK, European Union; Stroke Association; British Heart Foundation; the Department of Health; Food Standards Agency; Ministry of Agriculture, Fisheries and Food; Wellcome Trust |

**eTable 13.** Characteristics of included retrospective case-control studies of *trans* fatty acids and health outcomes.

| Source (Country)                                | Age | Sex (% Men) | No. Cases/Controls | Case definition                                                                                            | Control definition                                                                                                                                                      | Exposures assessed                                 | Exposure contrast                                                                                              | Case Assessment                                      | Adjustment for confounders                                                                                                                                                                                                                                                                                                | NOS score | Funding                                                                                                                                                                                                                           |
|-------------------------------------------------|-----|-------------|--------------------|------------------------------------------------------------------------------------------------------------|-------------------------------------------------------------------------------------------------------------------------------------------------------------------------|----------------------------------------------------|----------------------------------------------------------------------------------------------------------------|------------------------------------------------------|---------------------------------------------------------------------------------------------------------------------------------------------------------------------------------------------------------------------------------------------------------------------------------------------------------------------------|-----------|-----------------------------------------------------------------------------------------------------------------------------------------------------------------------------------------------------------------------------------|
| Aro et al., 1994; EURAMIC; 8 European countries | ≈54 | 100         | 671/717 [0.9:1]    | Men with first MI                                                                                          | Men without a history of MI, recruited from catechment area and frequency-matched in 5-y age groups; or hospital controls; or referred by local GPs or friends of cases | Trans 18:1                                         | Q4 vs. Q1<br>2.63 vs. 1.12%FA                                                                                  | confirmed by electrocardiographic and enzyme changes | <u>Matching:</u><br>Age<br><u>Covariates:</u><br>centre, smoking, BMI                                                                                                                                                                                                                                                     | 5         | British Heart Foundation, Dutch Ministry of Health, Spanish FIS, German Federal Health Office, Norwegian Research Council, Russian Ministry of Science, Swiss NRF (grant 32-31312-91), and the Yrjo Jahnsson Foundation, Finland. |
| Baylin et al., 2003; Costa Rica                 | 57  | 74          | 482/482 [1:1]      | Men and women survivors of a first acute MI at any of the three recruiting hospitals in the catchment area | population controls randomly identified with data from the National Census and Statistics Bureau of Costa Rica                                                          | Trans 16:1,<br>Trans 18:1,<br>Trans 18:2,<br>Total | Q5 vs. Q1<br>Total: 4.4 vs. 1.8 g/100g;<br>16:1: 0.115 vs. 0.044<br>18:1: 2.54 vs. 0.94<br>18:2: 2.04 vs. 0.75 | Confirmed by two independent cardiologists           | <u>Matching:</u><br>age, sex, area of residence<br><u>Covariates:</u><br>income, history of diabetes, history of hypertension, physical activity, smoking, years living in the house, alcohol, adipose tissue α-linolenic acid, dietary vitamin E, saturated fat, total energy, BMI, WHR, multivitamin use, folate, fiber | 8         | National Institutes of Health                                                                                                                                                                                                     |



**eTable 13.** Characteristics of included retrospective case-control studies of *trans* fatty acids and health outcomes.

| Source (Country)                     | Age    | Sex (% Men) | No. Cases/Controls | Case definition                                                                                                                                                                             | Control definition                                                                                   | Exposures assessed                                                                                       | Exposure contrast                                                                                                                                                                                                                                                                                        | Case Assessment                          | Adjustment for confounders                                                                                                                                                                                                                   | NOS score | Funding                                     |
|--------------------------------------|--------|-------------|--------------------|---------------------------------------------------------------------------------------------------------------------------------------------------------------------------------------------|------------------------------------------------------------------------------------------------------|----------------------------------------------------------------------------------------------------------|----------------------------------------------------------------------------------------------------------------------------------------------------------------------------------------------------------------------------------------------------------------------------------------------------------|------------------------------------------|----------------------------------------------------------------------------------------------------------------------------------------------------------------------------------------------------------------------------------------------|-----------|---------------------------------------------|
| Colon-Ramos et al., 2006; Costa Rica | ≈54    | 73          | 1797/1797 [1:1]    | Men and women survivors of first MI at 3 recruiting hospitals                                                                                                                               | Randomly sampled from area of residence of case using data from National Census and Statistic Bureau | Total <i>trans</i> , 18:1 <i>trans</i> , 18:2 <i>trans</i> ( <i>adipose tissue</i> )                     | Q5 vs. Q1 <u>1994-1999</u> :<br>Total <i>trans</i> : 4.40 vs. 1.85 g/100 g<br>18:1 <i>trans</i> : 2.54 vs. 0.93 g/100 g<br>18:2 <i>trans</i> : 2.02 vs. 0.75 g/100 g<br><u>2000-2003</u><br>Total <i>trans</i> : 3.42 vs. 1.84<br>18:1 <i>trans</i> : 1.94 vs. 0.85<br>18:2 <i>trans</i> : 1.40 vs. 0.74 | Confirmed by 2 independent cardiologists | Matching: Age, sex, area of residence<br>Covariates: Income, history of diabetes, history of hypertension, physical activity, smoking status, alcohol intake, adipose tissue α-linolenic acid, vitamin E intake, saturated fat, total energy | 8         | NIDDK; National Institutes of Health (U.S.) |
| Ghahremanpour et al., 2008; Iran     | 53 (8) | 69          | 105/68 [1.5:1]     | Men and women <75 y.o. with no previous admission for CVD events, or treatment for diabetes or dyslipidemia; angiographically proven coronary artery stenosis from Rajaee Hospital (Tehran) | Healthy volunteers with no history of CVD and same exclusion criteria                                | Total <i>trans</i> ; 18:1 <i>trans</i> , 18:2 <i>trans</i> , 16:1 <i>trans</i> ( <i>Adipose tissue</i> ) | IQR (g/100 g)<br>total <i>trans</i> : 13.7;<br>18:1 <i>trans</i> : 11.3;<br>18:2 <i>trans</i> : 4.6;<br>16:1 <i>trans</i> : 1.5                                                                                                                                                                          | Unclear                                  | Matching: age, sex<br>Covariates: Hypertension, smoking, triglyceride, adipose tissue PUFA                                                                                                                                                   | 5         | Not stated                                  |

**eTable 13.** Characteristics of included retrospective case-control studies of *trans* fatty acids and health outcomes.

| Source (Country)                  | Age     | Sex (% Men) | No. Cases/Controls | Case definition                                                                                                             | Control definition                                                                                                                                         | Exposures assessed                                                                                                       | Exposure contrast                                                                                                                                               | Case Assessment                                                         | Adjustment for confounders                                                                                                                                                                                                                     | NOS score | Funding                                                                                                                                             |
|-----------------------------------|---------|-------------|--------------------|-----------------------------------------------------------------------------------------------------------------------------|------------------------------------------------------------------------------------------------------------------------------------------------------------|--------------------------------------------------------------------------------------------------------------------------|-----------------------------------------------------------------------------------------------------------------------------------------------------------------|-------------------------------------------------------------------------|------------------------------------------------------------------------------------------------------------------------------------------------------------------------------------------------------------------------------------------------|-----------|-----------------------------------------------------------------------------------------------------------------------------------------------------|
| Park et al., 2009; South Korea    | 56 (14) | 71          | 50/50 [1:1]        | Consecutively recruited acute non-fatal MI admitted to Hanyang University Kuri Hospital                                     | Matched to controls on age and sex, with no history of CHD, cancer, hyperlipidemia, or diabetes                                                            | total <i>trans</i> ; <i>trans</i> 18:1n-9; <i>trans</i> 18:2n-6 <i>trans</i> (Erythrocyte)                               | T3 vs. T1 (total <i>trans</i> ) >0.45% vs. ≤0.06%<br>T3 vs. T1 (18:1n-9 <i>trans</i> ) >0.35% vs. ≤0.22%<br>T3 vs. T1 (18:2n-6 <i>trans</i> ) >0.29% vs. ≤0.19% | Hospital chart review                                                   | Matching: age, sex<br>Covariates: Age, sex, history of DM, family history of CHD, smoking, hypertension, glucose, total-C, HDL-C                                                                                                               | 3         | Korean Research Foundation                                                                                                                          |
| Pedersen et al., 2000; Norway     | 62 (8)  | 72          | 100/98 [1:1]       | First MI admitted to the coronary care unit of Ostfold Central Hospital (Fredrikstad/Sarpsborg) and Illeval Hospital (Oslo) | Recruited from hospital catchment areas; supplemented with friends of cases, state and municipal employees, recreational seniors (within 2 months of case) | total <i>trans</i> (adipose)                                                                                             | Q5 vs. Q1 >4.75% vs. <3.35%                                                                                                                                     | Hospital chart review                                                   | Matching: sex, age, location<br>Covariates: Age, sex, WHR, smoking family history, α-LNA, α-LA                                                                                                                                                 | 7         | Throne Holst's Foundation for Nutrition Research; Norwegian Association of Margarine Producers; DeNoFa Fabriker AS; Tine Norwegian Dairies (Norway) |
| Block et al., 2009; United States | 61 (12) | 66          | 768/768 [1:1]      | Identified from registry of patients with confirmed diagnosis of ACS (acute MI or unstable angina)                          | Outpatients from same hospitals having routine blood draw for clinical testing                                                                             | Total <i>trans</i> , <i>trans</i> oleic acid, <i>trans,trans</i> linoleic acid, <i>trans</i> palmitic acid (erythrocyte) | Per 1-SD increased in TFA                                                                                                                                       | 3 physicians reviewed charts; attained consensus on the final diagnosis | Matching: age, sex, race<br>Covariates: Lipid levels, BMI, diabetes, hypertension, family history of CAD, personal history of MI or revascularization, alcohol, smoking, statin use, aspirin/ anticoagulant use, education, cell [EPA and DHA] | 6         | St. Luke's Hospital Foundation; NIH (U.S.)                                                                                                          |

**eTable 13.** Characteristics of included retrospective case-control studies of *trans* fatty acids and health outcomes.

| Source (Country)                     | Age     | Sex (% Men)            | No. Cases/Controls | Case definition                                                                                                            | Control definition                                                                                         | Exposures assessed                                                                                                             | Exposure contrast                                                                                                                            | Case Assessment                                                          | Adjustment for confounders                                                                                            | NOS score | Funding                                       |
|--------------------------------------|---------|------------------------|--------------------|----------------------------------------------------------------------------------------------------------------------------|------------------------------------------------------------------------------------------------------------|--------------------------------------------------------------------------------------------------------------------------------|----------------------------------------------------------------------------------------------------------------------------------------------|--------------------------------------------------------------------------|-----------------------------------------------------------------------------------------------------------------------|-----------|-----------------------------------------------|
| Lopes et al., 2007; Portugal         | 58±11   | 100                    | 214/214 [1:1]      | Male patients ≥40 y.o. consecutively admitted to northern Portugal hospital with 1st MI, and 4-day survival                | Population-based; men ≥40 y.o.; random digit dialing from catchment area of the hospital; no history of MI | Total <i>trans</i> , 18:1 <i>trans</i> ; 18:2 <i>trans</i> (validated FFQ and adipose)                                         | Interquintile range: Total <i>trans</i> : 1.39%<br>Trans 18:2: 0.13%<br>Trans 18:1: >20 <sup>th</sup> %ile vs. <20 <sup>th</sup> %ile        | Attending cardiologist                                                   | Matching: age, sex<br>Covariates: Age, education, family history of MI, smoking, physical activity, total energy, BMI | 8         | Not stated                                    |
| Mashal et al., 2012; Jordan          | 33-51   | Cases: 74; Controls 31 | 100/91 [1:1]       | CHD cases diagnosed within the past 1yr at the King Hussein Medical Center                                                 | Apparently healthy personnel from the same hospital and friends and relatives                              | Total <i>trans</i> (FFQ)                                                                                                       | Q4 vs. Q1; per 1% per 100 g fat/d                                                                                                            | Determined by “experienced” staff cardiologist                           | Matching: none<br>Covariates: age, sex, diabetes, blood pressure, blood lipids                                        | 4         | Research Support Fund of University of Jordan |
| Ascherio et al., 1994; United States | 58 (10) | 78                     | 239/282 [1:1.2]    | White men and women aged <76 with no previous history of MI or angina presenting to 6 Boston, MA (USA) coronary care units | Selected at random from resident list of town that gave rise to the case                                   | All C18 <i>trans</i> , vegetable <i>trans</i> , animal <i>trans</i> (validated FFQ)                                            | Q5 vs. Q1<br>Total <i>trans</i> : 6.52 vs. 1.69 g/d<br>Vegetable <i>trans</i> : 5.04 vs. 0.84 g/d<br>Animal <i>trans</i> : 1.79 vs. 0.45 g/d | Confirmed from hospital record                                           | Matching: Age, sex, cardiac history                                                                                   | 8         | Not stated                                    |
| Clifton et al., 2004                 | 57      | 80                     | 79/167 [1:2]       | First admission for heart disease to 4 major hospitals in Adelaide; free of angina, dyslipidemia, or diabetes              | Drawn from a random sample from the electoral roll                                                         | 16:1 <i>trans</i> ; 18:1 <i>trans</i> (total); 18:1t9, 18:1t10, 18:1t11 (adipose tissue)<br>Total <i>trans</i> (validated FFQ) | Q5 vs. Q1 (diet): 3.7 g vs. 1.6 g/d                                                                                                          | Confirmed from hospital chart (clinical history) plus ECG or CK increase | Matching: age, sex, postal code<br>Covariates: energy, saturated fat                                                  |           | Meadow Lea Foods                              |

| Study                                                | Follow-up | Diet Method                     | Diet measured              | Unit increase | RR                       |
|------------------------------------------------------|-----------|---------------------------------|----------------------------|---------------|--------------------------|
| Nurses' Health Study <sup>66</sup>                   | 14 y      | Validated semi-quantitative FFQ | Baseline, 1984, 1986, 1990 | 2% E          | 1.30 (1.15, 1.47)        |
| Zutphen Elders Study <sup>30</sup>                   | 10 y      | Cross-check diet history        | Baseline, 1990, 1995       | 2% E          | 1.28 (1.01, 1.61)        |
| ATBC <sup>29</sup>                                   | 10 y      | Diet history questionnaire      | Baseline                   | 2% E          | 1.14 (0.96, 1.35)        |
| Health Professionals Follow-up Study <sup>2,28</sup> | 14 y      | Validated semi-quantitative FFQ | Baseline, 1990, 1994, 1998 | 2% E          | 1.26 (0.99, 1.61)        |
| <b>Meta-analysis</b>                                 |           |                                 |                            | <b>2% E</b>   | <b>1.25 (1.15, 1.36)</b> |

**eTable 14.** Pooled multivariable RR of CHD associated with a 2% increase in TFA intake at the expense of carbohydrate.

| Study                                                | Follow-up | Diet Method                     | Diet measured  | Unit increase         | RR                       |
|------------------------------------------------------|-----------|---------------------------------|----------------|-----------------------|--------------------------|
| Strong Heart Study (47-59 y) <sup>26</sup>           | 7 y       | 24-hour recall                  | Baseline       | 2% E                  | 1.25 (0.80, 1.94)        |
| Strong Heart Study (60-79 y) <sup>26</sup>           | 7 y       | 24-hour recall                  | Baseline       | 2% E                  | 1.12 (0.75, 1.43)        |
| Health Professionals' Followup Study <sup>28,2</sup> | 6 y       | Validated semi-quantitative FFQ | Baseline, 1990 | 2% E                  | 0.93 (0.52, 1.66)        |
| ATBC <sup>29</sup>                                   | 6.1 y     | Validated diet questionnaire    | Baseline       | 2% E <sup>cxiii</sup> | 1.41 (1.28, 1.56)        |
| <b>Meta-analysis</b>                                 |           |                                 |                | <b>2%E</b>            | <b>1.31 (1.13, 1.56)</b> |

**eTable 15.** Pooled multivariable RR of CHD mortality associated with a 2% increase in TFA intake at the expense of carbohydrate.

| Study                              | Follow-up | Diet Method                     | Diet measured              | Unit increase     | RR                       |
|------------------------------------|-----------|---------------------------------|----------------------------|-------------------|--------------------------|
| Nurses' health Study <sup>37</sup> | 14 y      | Validated semi-quantitative FFQ | Baseline, 1984, 1986, 1990 | 2% E              | 1.39 (1.15, 1.67)        |
| ATBC <sup>29</sup>                 | 12 y      | Validated diet questionnaire    | Baseline                   | 2% E <sup>i</sup> | 1.51 (1.04, 2.16)        |
| <b>Meta-analysis</b>               |           |                                 |                            | <b>2%E</b>        | <b>1.41 (1.20, 1.67)</b> |

**eTable 16.** Pooled multivariable RR of type 2 diabetes associated with a 2% increase in TFA intake at the expense of carbohydrate.

| Study                                              | Follow-up | Diet Method                     | Diet measured           | Unit increase        | RR                       |
|----------------------------------------------------|-----------|---------------------------------|-------------------------|----------------------|--------------------------|
| Health professionals follow-up study <sup>34</sup> | 14 y      | Validated semi-quantitative FFQ | Baseline, 1990, 1994    | 2% E                 | 0.86 (0.55, 1.32)        |
| Women's Health Initiative <sup>75</sup>            | 7.6 y     | Validated semi-quantitative FFQ | Baseline, 3 years later | 2% E <sup>cxiv</sup> | 1.09 (0.77, 1.53)        |
| <b>Meta-analysis</b>                               |           |                                 |                         | <b>2%E</b>           | <b>1.00 (0.76, 1.30)</b> |

**eTable 17.** Pooled multivariable RR of ischemic stroke associated with a 2% increase in TFA intake at the expense of carbohydrate.

**eTable 18.** GRADE Evidence Profile for prospective cohort studies of trans-fatty acids and health outcomes limiting analyses to those studies with a “highest” exposure category estimated >1% of dietary energy (Explanatory notes appear at the end of this document)

| Quality Assessment |                 |                                                 |                                       |                                        |                         |                                      |                            |                                       | Summary of Findings    |                                                  |                   |                                     |                         |            |
|--------------------|-----------------|-------------------------------------------------|---------------------------------------|----------------------------------------|-------------------------|--------------------------------------|----------------------------|---------------------------------------|------------------------|--------------------------------------------------|-------------------|-------------------------------------|-------------------------|------------|
| Exposure           | Outcome         | Participants<br>(# studies)                     | Risk of bias                          | Inconsistency                          | Indirectness            | Imprecision                          | Publication bias           | Overall quality of evidence           | Study event rate (%)   | Absolute - adjusted<br>(per 10,000) <sup>1</sup> | Dose-Response     | Most-adjusted<br>MV RR              | Least-adjusted<br>MV RR | Importance |
| Total TFA          | Total mortality | 18,513 (1 study; 1 comparison) <sup>2</sup>     | No serious risk of bias <sup>3</sup>  | Not assessed <sup>4</sup>              | No serious indirectness | No serious imprecision <sup>5</sup>  | Not assessed <sup>6</sup>  | ⊕⊕○○<br><b>LOW</b> <sup>7</sup>       | 1,573/18,513<br>(8.5%) | 274 more<br>(from 46 more to 536 more)           | Yes <sup>8</sup>  | 1.24<br>(1.04 to 1.47) <sup>9</sup> | 1.83<br>(1.57 to 2.15)  | CRITICAL   |
|                    | CHD mortality   | 70,864 (5 studies; 6 comparisons) <sup>10</sup> | No serious risk of bias <sup>11</sup> | No serious inconsistency <sup>12</sup> | No serious indirectness | No serious imprecision <sup>13</sup> | Not assessed <sup>14</sup> | ⊕⊕⊕○<br><b>MODERATE</b> <sup>15</sup> | 1,234/70,864<br>(1.7%) | 56 more<br>(from 18 more to 101 more)            | Yes <sup>16</sup> | 1.28<br>(1.09 to 1.50)              | 1.34<br>(1.00 to 1.79)  | CRITICAL   |

| Quality Assessment |                 |                                                  |                                       |                                        |                         |                                      |                            | Summary of Findings                   |                      |                                                   |                       |                        |                         |            |
|--------------------|-----------------|--------------------------------------------------|---------------------------------------|----------------------------------------|-------------------------|--------------------------------------|----------------------------|---------------------------------------|----------------------|---------------------------------------------------|-----------------------|------------------------|-------------------------|------------|
| Exposure           | Outcome         | Participants<br>(# studies)                      | Risk of bias                          | Inconsistency                          | Indirectness            | Imprecision                          | Publication bias           | Overall quality of evidence           | Study event rate (%) | Absolute - adjusted<br>(per 10,000) <sup>17</sup> | Dose-Response         | Most-adjusted<br>MV RR | Least-adjusted<br>MV RR | Importance |
| Total TFA          | CHD total       | 145,922 (6 studies; 7 comparisons) <sup>18</sup> | No serious risk of bias <sup>19</sup> | No serious inconsistency <sup>20</sup> | No serious indirectness | No serious imprecision <sup>21</sup> | Not assessed <sup>22</sup> | ⊕⊕⊕○<br><b>MODERATE</b> <sup>23</sup> | 4,579/145,922 (3.1%) | 88 more (from 42 more to 139 more)                | Yes <sup>24</sup>     | 1.21<br>(1.10 to 1.33) | 1.31<br>(1.15 to 1.48)  | CRITICAL   |
|                    | Ischemic Stroke | 190,284 (3 studies; 4 comparisons) <sup>25</sup> | No serious risk of bias <sup>26</sup> | Serious inconsistency <sup>27</sup>    | No serious indirectness | Serious imprecision <sup>28</sup>    | Not assessed <sup>29</sup> | ⊕○○○<br><b>VERY LOW</b> <sup>30</sup> | 1,905/190,284 (1.0%) | 5 more (from 8 fewer to 20 more)                  | No <sup>31</sup>      | 1.07<br>(0.88 to 1.28) | 1.13<br>(0.94 to 1.37)  | CRITICAL   |
|                    | Type 2 diabetes | 230,135(6 studies; 6 comparisons) <sup>32</sup>  | Serious risk of bias <sup>33</sup>    | Serious inconsistency <sup>34</sup>    | No serious indirectness | Serious imprecision <sup>35</sup>    | Not assessed <sup>36</sup> | ⊕○○○<br><b>VERY LOW</b> <sup>37</sup> | 8,690/230,135 (3.8%) | 56 more (from 28 fewer to 151 more)               | Unclear <sup>38</sup> | 1.10<br>(0.95 to 1.27) | 1.28<br>(1.05 to 1.55)  | CRITICAL   |

---

<sup>1</sup> Absolute risk was estimated using the method of Newcombe et al. (*Evid Based Med* 2014;19;6-8). Estimates of baseline risk and associated 95% confidence levels, were obtained from the Emerging Risk Factors Consortium (*Lancet* 2010 Jun 26;375(9733):2215-22) which included 691,872 people from 102 prospective studies. Overall, the mean age of participants at entry was 52 (SD 13) years, and 297,081 (43%) were women. (96%) were in Europe, North America, and Australasia, with the remainder in Japan or the Caribbean. These risks were 11.4% (11.2% to 11.6%) for total mortality; 2.0% (1.9% to 2.2%) for CHD mortality, 4.2% (4.1% to 4.4%) for total CHD; 0.7% (0.5% to 0.8%) for ischemic stroke; and 5.6% (5.5% to 5.8%) for type 2 diabetes.

<sup>2</sup> Included data from 1 prospective cohort study (1 comparison), with 7 years of follow-up, enrolling participants from the United States.

<sup>3</sup> Possibility of residual confounding always must be considered in observational studies. Newcastle-Ottawa score was 8. Fully-adjusted model yielded weaker estimate than minimally-adjusted model, suggesting that these variables captured some important confounders. Since the direction of the bias is likely towards the null, and the pooled estimate exceeded the threshold of harm (>1.2), not downgraded.

<sup>4</sup> Unable to assess with only one study.

<sup>5</sup> Optimal information size met (n= 1,573 events); summary RR does not cross 1.0, however upper 95% CI exceeds threshold of harm (>1.2) and lower 95% CI excludes meaningful benefit.

<sup>6</sup> Unable to assess with only one study.

<sup>7</sup> Data from cohort studies begin with a grade of "LOW". Not downgraded.

<sup>8</sup> P-value for trend of increased risk across quintiles of intake=0.004; the study did not present data for the continuous association. Because only 1 cohort provided data for test for trend, we did not feel confident upgrading for possible dose-response.

<sup>9</sup> Estimate from one study.

<sup>10</sup> Included data from 5 prospective cohort studies (6 comparisons), with a duration of follow-up from 6 to 21.4 years (median=6.6), enrolling participants from 3 different countries (USA, Finland, and the Netherlands).

<sup>11</sup> Possibility of residual confounding always must be considered in observational studies. Fully-adjusted model yielded weaker estimates than minimally-adjusted models, suggesting that these variables captured some important confounders. Newcastle-Ottawa scores of these studies range from 7 to 9 (median=7.5). Diet assessment in 3 studies (Ascherio et al., Pietinen et al., Oomen et al.) was by validated instrument. In Xu et al., a single 24-h recall was used. Using a single dietary assessment may induce misclassification of true diet over the longer term, as during the follow-up period, it is likely that the composition of the food supply changed substantially. Since the direction of the bias is likely towards the null, and the pooled estimate exceeded the threshold of harm (>1.2), not downgraded.

<sup>12</sup>  $I^2=0\%$ ;  $P_{het}=0.66$ . 5 studies had point estimates >1.0 and 95% CI and in the 1 study that did not, the 95% CI of this estimate was 0.42 to 1.65.

<sup>13</sup> Optimal information size met (n=1,234 events); summary RR does not cross 1.0, however upper 95% CI exceeds threshold of harm (>1.2) and lower 95% CI bound excludes meaningful benefit.

<sup>14</sup> Due to small number of studies (n<10) risk of publication bias not formally assessed. However, inclusion of additional "underpublished" data from the Iowa Womens' Health study + Finnish Mobile Health Clinics Study (see eFigure 17) results in pooled estimate of 1.22 (95% CI: 1.07 to 1.36; P=0.002;  $I^2=0\%$ ;  $P_{het}=0.46$ )

<sup>15</sup> Data from cohort studies begin with a grade of "LOW". Upgraded (+1) due to evidence for dose-response.

<sup>16</sup> Continuous dose-response relationship was assessed in 4 studies (n=1,002 events; RR per 2% increase in TFA at the expense of carbohydrate: 1.31 (1.13 to 1.56).

<sup>17</sup> Estimated using prevalence data from Heart and Stroke Foundation (Canada), American Heart Association (U.S.A.), American Diabetes Association (U.S.A.), World Health Organization (WHO), Centers for Disease Control (U.S.A.)

<sup>18</sup> Included data from 6 prospective cohort studies (7 comparisons), with a duration of follow-up from 1 to 20 years (median=6), enrolling participants from 3 different countries (USA, Finland, Netherlands).

<sup>19</sup> Possibility of residual confounding always must be considered in observational studies. Newcastle-Ottawa scores of these studies range from 7 to 9 (median=8). Fully-adjusted model yielded weaker estimates than minimally-adjusted models, suggesting that these variables captured some important confounders. Both studies assessed diet with validated instruments, at multiple time points. Not downgraded.

<sup>20</sup>  $I^2=0\%$ ;  $P_{het}=0.43$ . All 7 comparisons reported point estimates >1.0.

C:\Users\Russell\Dropbox\WHO Sat and Trans Fat Combined- BMJ\06-01-2015\_RESUBMISSION\etable 18 GRADE gt1%.docx



- <sup>21</sup> Optimal information size met (n=4,579 events); summary RR does not cross 1.0, however upper 95% CI exceeds threshold of harm (>1.2) and lower 95% CI bound excludes meaningful benefit.
- <sup>22</sup> Due to small number of studies (n<10) risk of publication bias not formally assessed.
- <sup>23</sup> Data from cohort studies begin with a grade of “LOW”. Upgraded (+1) due to evidence for dose-response.
- <sup>24</sup> Continuous dose-response relationship was assessed in 4 studies (n=1,852 events; pooled mVRR per 2% increase in TFA at the expense of carbohydrate: 1.25 (1.15 to 1.36); meta-analyses of non-referent quantiles found statistically significant increased risk within all quantiles.
- <sup>25</sup> Included data from 3 prospective cohort studies (4 comparisons), with a duration of follow-up from 7 to 14 years (median=7.3), enrolling participants from the United States.
- <sup>26</sup> Possibility of residual confounding always must be considered in observational studies. Newcastle-Ottawa scores for 3 studies ranged from 7 to 8 (median=7.5). Common limitations were failure to control for family history, and unclear attrition rates.
- <sup>27</sup>  $I^2=67\%$ ;  $2/4 >1.0$ . Notably, an important inconsistency is that one study (He et al.) suggests important benefit (RR at the lower bound of clinically relevant benefit, RR=0.8) while and another study (Yaemsiri et al.) suggests clinically important harm (RR=1.39, greater than 1.2). The 95% CI of each individual study would exclude the point-estimate of the other.
- <sup>28</sup> Optimal information size met (n=1,905 events); summary RR crosses 1.0: lower bound of 95% CI approaches 0.8 and the upper bound is >1.2, which is consistent with is approaching clinically significant benefit and exceeding the upper threshold for harm.
- <sup>29</sup> Due to small number of studies (n<10) risk of publication bias not formally assessed
- <sup>30</sup> Data from cohort studies begin with a grade of “LOW”. Downgraded due to serious inconsistency, and serious imprecision.
- <sup>31</sup> Two studies directly assessed dose-response (He et al. and Yaemsiri et al.); no continuous association seen in either study.
- <sup>32</sup> Included data from 6 prospective cohort studies (6 comparisons), with a duration of follow-up from 8.8 to 20 years (median=12), enrolling participants from the United States (n=5) and Finland (n=1).
- <sup>33</sup> Possibility of residual confounding always must be considered in observational studies. Newcastle-Ottawa scores of these studies range from 6 to 9 (median=8). Fully-adjusted model yielded weaker estimates than minimally-adjusted models, suggesting that these variables captured some important confounders. A sensitivity analysis suggested the positive association seen in Salmeron et al. may be attributable to other dietary variables. Pooling the models which did not adjust for fiber and magnesium (Salmeron et al., van Dam et al., Simila et al.), resulted in a MVRR = 1.28 (95% CI: 1.16 to 1.41) though this may reflect failure to adjust for other important confounders. Pooling 5 studies that did not adjust for Mg or Fiber (and other confounders) yields an mVRR = 1.25 (95% CI: 1.15 to 1.36;  $P<0.001$ ;  $I^2=0\%$ ;  $P_{het}=0.72$ )
- <sup>34</sup>  $I^2=66\%$ ;  $P_{het}=0.01$ . Point estimates for 4 studies >1.0; point estimates for 2 studies <1.0. Upper bound of 95% CI >1.2 but lower bound >0.8.
- <sup>35</sup> Optimal information size met (n=8,690 events); summary 95% CI of the RR includes 1.0, but upper bound >1.25, consistent with possible harm. Lower CI excludes meaningful benefit.
- <sup>36</sup> Due to small number of studies (n<10) risk of publication bias not formally assessed
- <sup>37</sup> Cohort studies start with a GRADE of “LOW”. Downgraded for serious risk of bias, inconstancy, and imprecision.
- <sup>38</sup> Two studies (n=3,605 cases) directly assessed the dose-response association. In these 2 studies, a 2% increase in energy from trans fatty acids (at the expense of carbohydrate) was associated with a 41% increased risk of type 2 diabetes (MVRR: 1.41; 95% CI: 1.20 to 1.67). However, studies which did not directly assess this association failed to find associations between extreme quantiles.

**eTable 19.** GRADE Evidence Profile for prospective cohort studies of trans-fatty acids and health outcomes comparing highest vs. Lowest exposure levels, where referent group TFA reported (or estimated to be) <1% of energy.

| Quality Assessment |                 |                                                |                                      |                                       |                         |                                     |                           |                                      | Summary of Findings     |                                                               |                   |                                |                                 |            |
|--------------------|-----------------|------------------------------------------------|--------------------------------------|---------------------------------------|-------------------------|-------------------------------------|---------------------------|--------------------------------------|-------------------------|---------------------------------------------------------------|-------------------|--------------------------------|---------------------------------|------------|
| Exposure           | Outcome         | Participants<br>(# studies)                    | Risk of<br>bias                      | Inconsistency                         | Indirectness            | Imprecision                         | Publication<br>bias       | Overall<br>quality of<br>evidence    | Study event<br>rate (%) | Absolute<br>-<br>adjusted<br><br>(per<br>10,000) <sup>1</sup> | Dose-<br>Response | Most-<br>adjusted<br><br>MV RR | Least-<br>adjusted<br><br>MV RR | Importance |
| Total TFA          | Total mortality | 0/0                                            | -                                    | -                                     | -                       | -                                   | -                         | -                                    | -                       | -                                                             | -                 | -                              | -                               | CRITICAL   |
|                    | CHD mortality   | 68,957 (4 studies, 4 comparisons) <sup>2</sup> | No serious risk of bias <sup>3</sup> | No serious inconsistency <sup>4</sup> | No serious indirectness | No serious imprecision <sup>5</sup> | Not assessed <sup>6</sup> | ⊕⊕⊕○<br><b>MODERATE</b> <sup>7</sup> | 1,093/68,957 (1.6%)     | 56 more (from 18 more to 101 more)                            | Yes <sup>8</sup>  | 1.28 (1.09 to 1.50)            | 1.31 (0.94 to 1.83)             | CRITICAL   |

| Quality Assessment |                 |                                                  |                                       |                                        |                         |                                      |                            |                                | Summary of Findings  |                                                  |                       |                        |                         |            |
|--------------------|-----------------|--------------------------------------------------|---------------------------------------|----------------------------------------|-------------------------|--------------------------------------|----------------------------|--------------------------------|----------------------|--------------------------------------------------|-----------------------|------------------------|-------------------------|------------|
| Exposure           | Outcome         | Participants<br>(# studies)                      | Risk of bias                          | Inconsistency                          | Indirectness            | Imprecision                          | Publication bias           | Overall quality of evidence    | Study event rate (%) | Absolute - adjusted<br>(per 10,000) <sup>9</sup> | Dose-Response         | Most-adjusted<br>MV RR | Least-adjusted<br>MV RR | Importance |
| Total TFA          | CHD total       | 101,499 (4 studies, 4 comparisons) <sup>10</sup> | No serious risk of bias <sup>11</sup> | No serious inconsistency <sup>12</sup> | No serious indirectness | No serious imprecision <sup>13</sup> | Not assessed <sup>14</sup> | ⊕⊕⊕○<br>MODERATE <sup>15</sup> | 2,715/101,499 (2.7%) | 67 more (from 17 more to 122 more)               | Yes <sup>16</sup>     | 1.16<br>(1.04 to 1.29) | 1.26<br>(1.10 to 1.44)  | CRITICAL   |
|                    | Ischemic Stroke | 86,152 (1 study, 1 comparison) <sup>17</sup>     | No serious risk of bias <sup>18</sup> | Not assessed <sup>19</sup>             | No serious indirectness | Serious imprecision <sup>20</sup>    | Not assessed <sup>21</sup> | ⊕○○○<br>VERY LOW <sup>22</sup> | 455/86,152 (0.5%)    | 14 fewer (from 33 fewer to 13 more)              | No <sup>23</sup>      | 0.80<br>(0.54 to 1.18) | 0.93<br>(0.69 to 1.25)  | CRITICAL   |
|                    | Type 2 diabetes | 109,963 (4 studies, 4 comparisons) <sup>24</sup> | Serious risk of bias <sup>25</sup>    | Serious inconsistency <sup>26</sup>    | No serious indirectness | Serious imprecision <sup>27</sup>    | Not assessed <sup>28</sup> | ⊕○○○<br>VERY LOW <sup>29</sup> | 4,293/109,963 (3.9%) | 45 more (from 45 fewer to 157 more)              | Unclear <sup>30</sup> | 1.08<br>(0.92 to 1.28) | 1.42<br>(1.20 to 1.69)  | CRITICAL   |



<sup>1</sup> Absolute risk was estimated using the method of Newcombe et al. (*Evid Based Med* 2014;19;6-8). Estimates of baseline risk and associated 95% confidence levels, were obtained from the Emerging Risk Factors Consortium (*Lancet* 2010 Jun 26;375(9733):2215-22) which included 691,872 people from 102 prospective studies. Overall, the mean age of participants at entry was 52 (SD 13) years, and 297,081 (43%) were women. (96%) were in Europe, North America, and Australasia, with the remainder in Japan or the Caribbean. These risks were 11.4% (11.2% to 11.6%) for total mortality; 2.0% (1.9% to 2.2%) for CHD mortality, 4.2% (4.1% to 4.4%) for total CHD; 0.7% (0.5% to 0.8%) for ischemic stroke; and 5.6% (5.5% to 5.8%) for type 2 diabetes.

<sup>2</sup> Included data from 4 prospective cohort studies (4 comparisons), with a duration of follow-up from 6 to 21.4 years (median=6.6), enrolling participants from 2 different countries (USA and Finland).

<sup>3</sup> Possibility of residual confounding always must be considered in observational studies. Fully-adjusted model yielded similar estimates to minimally adjusted models. Newcastle-Ottawa scores of these studies range from 7 to 9 (median=8.5). Diet assessment in 3 studies (Ascherio et al., Pietinen et al., Virtanen et al.) was by validated instrument. In Xu et al., a single 24-h recall was used. Using a single dietary assessment may induce misclassification of true diet over the longer term, as during the follow-up period, it is likely that the composition of the food supply changed substantially. Since the direction of the bias is likely towards the null, and the pooled estimate exceeded the threshold of harm (>1.2), not downgraded.

<sup>4</sup>  $I^2=0\%$ ;  $P_{het}=0.64$ . All 4 studies had point estimates >1.0.

<sup>5</sup> Optimal information size met (n=1,093 events); summary RR does not cross 1.0, however upper 95% CI exceeds threshold of harm (>1.2) and lower 95% CI bound excludes meaningful benefit.

<sup>6</sup> Due to small number of studies (n<10) risk of publication bias not formally assessed. However, inclusion of additional "underpublished" data from the Iowa Womens' Health study + Finnish Mobile Health Clinics Study results in pooled estimate of 1.21 (95% CI: 1.05 to 1.40; P=0.008;  $I^2=4\%$ ;  $P_{het}=0.40$ )

<sup>7</sup> Data from cohort studies begin with a grade of "LOW". Upgraded (+1) due to evidence for dose-response.

<sup>8</sup> Continuous dose-response relationship was assessed in 3 studies (n=910 events; RR per 2% increase in TFA at the expense of carbohydrate: 1.37 (1.21 to 1.56).

<sup>9</sup> Estimated using prevalence data from Heart and Stroke Foundation (Canada), American Heart Association (U.S.A.), American Diabetes Association (U.S.A.), World Health Organization (WHO), Centers for Disease Control (U.S.A.)

<sup>10</sup> Included data from 4 prospective cohort studies (4 comparisons), with a duration of follow-up from 1 to 7.2 years (median=6), enrolling participants from 2 different countries (USA, Finland).

<sup>11</sup> Possibility of residual confounding always must be considered in observational studies. Newcastle-Ottawa scores of these studies range from 8 to 9 (median=8.5). Fully-adjusted model yielded weaker estimates than minimally-adjusted models, suggesting that these variables captured some important confounders. Both studies assessed diet with validated instruments, at multiple time points. Not downgraded.

<sup>12</sup>  $I^2=0\%$ ;  $P_{het}=0.91$ . All 4 comparisons reported point estimates >1.0.

<sup>13</sup> Optimal information size met (n=2,719 events); summary RR does not cross 1.0, however upper 95% CI exceeds threshold of harm (>1.2) and lower 95% CI bound excludes meaningful benefit.

<sup>14</sup> Due to small number of studies (n<10) risk of publication bias not formally assessed.

<sup>15</sup> Data from cohort studies begin with a grade of "LOW". Upgraded (+1) due to evidence for dose-response.

<sup>16</sup> Continuous dose-response relationship was assessed in 2 studies (n=2,133 events; pooled mvRR per 2% increase in TFA at the expense of carbohydrate: 1.15 (0.97 to 1.36); meta-analyses of non-referent quantiles found statistically significant increased risk within all quantiles.

<sup>17</sup> Included data from 1 prospective cohort study (1 comparison), with a duration of follow-up of 14 years, enrolling participants from the United States.

<sup>18</sup> Possibility of residual confounding always must be considered in observational studies. Newcastle-Ottawa score for this study was 7. Limitations were failure to control for family history, and unclear attrition rate.

<sup>19</sup> Not assessed; only 1 study.

<sup>20</sup> Optimal information size met (n=455 events); summary RR crosses 1.0: lower bound of 95% CI exceeds 0.8 and the upper bound is approaching 1.2, which is consistent with is approaching clinically significant benefit and exceeding the upper threshold for harm.

<sup>21</sup> Not assessed; only 1 study.

<sup>22</sup> Data from cohort studies begin with a grade of "LOW". Downgraded due to serious imprecision.

<sup>23</sup> This study directly modeled continuous dose-response; no continuous association was seen.

<sup>24</sup> Included data from 4 prospective cohort studies (4 comparisons), with a duration of follow-up from 8.8 to 20 years (median=12), enrolling participants from the United States (n=3) and Finland (n=1).

<sup>25</sup> Possibility of residual confounding always must be considered in observational studies. Newcastle-Ottawa scores of these studies range from 7 to 9 (median=8). Fully-adjusted model yielded weaker estimates than minimally-adjusted models, suggesting that these variables captured some important confounders. Pooling the models which did not adjust for fiber and magnesium (van Dam et al., Simila et al.), resulted in a MVRR = 1.26 (95% CI: 1.11 to 1.43) though this may reflect failure to adjust for other important

---

confounders. Pooling 4 estimates that did not adjust for Mg or Fiber (but which did address other potential confounders) yields an mVRR = 1.23 (95% CI: 1.12 to 1.35;  $P < 0.001$ ;  $I^2 = 0\%$ ;  $P_{het} = 0.67$ )

<sup>26</sup>  $I^2 = 54\%$ ;  $P_{het} = 0.09$ . Point estimates for 3 studies  $> 1.0$ ; point estimates for 1 study  $< 1.0$ . Upper bound of 95% CI  $> 1.2$  but lower bound  $> 0.8$ .

<sup>27</sup> Optimal information size met ( $n = 4,293$  events); summary 95% CI of the RR includes 1.0, but upper bound  $> 1.25$ , consistent with possible harm. Lower CI excludes meaningful benefit.

<sup>28</sup> Due to small number of studies ( $n < 10$ ) risk of publication bias not formally assessed

<sup>29</sup> Cohort studies start with a GRADE of "LOW". Downgraded for serious risk of bias, inconsistency, and imprecision.

<sup>30</sup> One study ( $n = 1,097$  cases) directly assessed the dose-response association. In this study, a 2% increase in energy from trans fatty acids (at the expense of carbohydrate) was associated with a 51% increased risk of type 2 diabetes (MVRR: 1.51; 95% CI: 1.04 to 2.16). However, studies which did not directly assess this association failed to find associations between extreme quintiles.

**eTable 20:** Reported and estimated dietary intakes of trans fatty acids in cohort studies, according to quantile.

Percent intakes, where not provided (*italics*) were calculated from grams/d assuming that cohorts of women consumed 1800 kcal/d; and cohorts of men consumed 2100 kcal/d. Highest = fifth quintile, unless another quantile is in bold, in which case that quantile is the highest category.

| Study                                | figure     | Measure       | % energy     |              |              |              |               |              | grams  |      |      |      |         |
|--------------------------------------|------------|---------------|--------------|--------------|--------------|--------------|---------------|--------------|--------|------|------|------|---------|
|                                      |            |               | Lowest       | Q2           | Q3           | Q4           | Highest       | Contrast     | Lowest | Q2   | Q3   | Q4   | Highest |
| <b>All-Cause Mortality</b>           |            |               |              |              |              |              |               |              |        |      |      |      |         |
| Chien                                | eFigure 11 | total tfa     | n/r          |              |              |              | n/r           |              | n/r    |      |      |      | n/r     |
| Kiage                                | eFigure 11 | total tfa     | 1.60%        | 2.30%        | 2.84%        | 3.45%        | 4.68%         | 3.08%        |        |      |      |      |         |
| <b>CHD Mortality</b>                 |            |               |              |              |              |              |               |              |        |      |      |      |         |
| Ascherio                             | eFigure 15 | total tfa     | <i>0.64%</i> | <i>0.94%</i> | <i>1.16%</i> | <i>1.41%</i> | <i>1.84%</i>  | 1.20%        | 1.5    | 2.2  | 2.7  | 3.3  | 4.3     |
| Pietinen                             | eFigure 15 | total tfa     | <i>0.56%</i> | <i>0.73%</i> | <i>0.86%</i> | <i>1.16%</i> | <i>2.40%</i>  | <i>1.84%</i> | 1.3    | 1.7  | 2    | 2.7  | 5.6     |
| Oomen                                | eFigure 15 | total tfa     |              |              |              |              | 2% contrast   | 2.00%        |        |      |      |      |         |
| Xu 60-79                             | eFigure 15 | total tfa     | 1.00%        | 1.80%        | 2.60%        | <b>3.90%</b> | 3.90%         | 2.90%        |        |      |      |      |         |
| Xu 47-59                             | eFigure 15 | total tfa     | 0.90%        | 1.80%        | 2.60%        | <b>4.00%</b> | 4.00%         | 3.10%        |        |      |      |      |         |
| Virtanen                             | eFigure 15 | total tfa     | 0.70%        | 0.90%        | 1.10%        | <b>1.50%</b> | 1.50%         | 0.80%        |        |      |      |      |         |
| <b>CHD Mortality (+ unpublished)</b> |            |               |              |              |              |              |               |              |        |      |      |      |         |
| Ascherio                             | eFigure 17 | total tfa     | <i>0.64%</i> | <i>0.94%</i> | <i>1.16%</i> | <i>1.41%</i> | <i>1.80%</i>  | 1.16%        | 1.5    | 2.2  | 2.7  | 3.3  | 4.2     |
| Pietinen                             | eFigure 17 | total tfa     | <i>0.56%</i> | <i>0.73%</i> | <i>0.86%</i> | <i>1.16%</i> | <i>2.40%</i>  | <i>1.84%</i> | 1.3    | 1.7  | 2    | 2.7  | 5.6     |
| Oomen                                | eFigure 17 | total tfa     |              |              |              |              | 2% contrast   | 2%           |        |      |      |      |         |
| Xu 60-79                             | eFigure 17 | total tfa     | 1.00%        | 1.80%        | 2.60%        | <b>3.90%</b> | 3.90%         | 2.90%        |        |      |      |      |         |
| Xu 47-59                             | eFigure 17 | total tfa     | 0.90%        | 1.80%        | 2.60%        | <b>4.00%</b> | 4.00%         | 3.10%        |        |      |      |      |         |
| Robien                               | eFigure 17 | total tfa     |              |              |              |              | 1.5% contrast | 1.50%        |        |      |      |      |         |
| Knekt 2013                           | eFigure 17 | total tfa (W) | <i>0.45%</i> | <i>0.68%</i> | <i>0.85%</i> | <i>1.08%</i> | <i>1.70%</i>  | 1.25%        | 0.89   | 1.35 | 1.69 | 2.16 | 3.39    |
| Knekt 2013                           | eFigure 17 | total tfa (M) | <i>0.56%</i> | <i>0.79%</i> | <i>0.98%</i> | <i>1.23%</i> | <i>1.99%</i>  | 1.43%        | 1.3    | 1.85 | 2.29 | 2.87 | 4.64    |
| Virtanen                             | eFigure 17 | total tfa     | 0.70%        | 0.90%        | 1.10%        | <b>1.50%</b> | 1.50%         | 0.80%        |        |      |      |      |         |

| Study                      | figure     | Measure       | % energy |              |       |              |               | grams    |                                      |      |      |      |         |
|----------------------------|------------|---------------|----------|--------------|-------|--------------|---------------|----------|--------------------------------------|------|------|------|---------|
|                            |            |               | Lowest   | Q2           | Q3    | Q4           | Highest       | Contrast | Lowest                               | Q2   | Q3   | Q4   | Highest |
| <b>CHD total</b>           |            |               |          |              |       |              |               |          |                                      |      |      |      |         |
| Pietinen                   | eFigure 19 | total tfa     | 0.56%    | 0.73%        | 0.86% | 1.16%        | 2.66%         | 2.10%    | 1.3                                  | 1.7  | 2    | 2.7  | 6.2     |
| Oomen                      | eFigure 19 | total tfa     |          |              |       |              | 2% contrast   | 2.00%    |                                      |      |      |      |         |
| Oh >=65                    | eFigure 19 | total tfa     | 1.30%    | 1.60%        | 1.90% | 2.20%        | 2.80%         | 1.50%    | *not reported by age; used whole pop |      |      |      |         |
| Oh <65                     | eFigure 19 | total tfa     | 1.30%    | 1.60%        | 1.90% | 2.20%        | 2.80%         | 1.50%    | *not reported by age; used whole pop |      |      |      |         |
| Xu                         | eFigure 19 | total tfa     | 0.90%    | 1.80%        | 2.60% | <b>3.90%</b> | 3.90%         | 3.00%    |                                      |      |      |      |         |
| Howard                     | eFigure 19 | total tfa     | 0.55%    | <b>2.50%</b> |       |              | 2.50%         | 1.95%    |                                      |      |      |      |         |
| <b>Ischemic Stroke</b>     |            |               |          |              |       |              |               |          |                                      |      |      |      |         |
| He                         | eFigure 21 | total tfa     | 0.72%    | 1.00%        | 1.23% | 1.47%        | 1.89%         | 1.18%    | 1.67                                 | 2.34 | 2.86 | 3.44 | 4.42    |
| Yaemsiri                   | eFigure 21 | total tfa     | 1.10%    | 1.15%        | 1.30% | 1.70%        | 3.05%         | 1.95%    | 2.2                                  | 2.3  | 2.6  | 3.4  | 6.1     |
| Kiage 2014 W               | eFigure 21 | total tfa     |          |              |       |              | 1.1% contrast | 1.1%     |                                      |      |      |      | 2.13    |
| Kiage 2014 M               | eFigure 21 | total tfa     |          |              |       |              | 0.9% contrast | 0.9%     |                                      |      |      |      | 2.13    |
| <b>type 2 diabetes</b>     |            |               |          |              |       |              |               |          |                                      |      |      |      |         |
| Salmeron                   | eFigure 23 | total tfa     | 1.30%    | 1.70%        | 2.00% | 2.40%        | 2.90%         | 1.60%    |                                      |      |      |      |         |
| Meyer                      | eFigure 23 | total tfa     | 1.10%    | 1.20%        | 1.40% | 1.75%        | 2.60%         | 1.50%    | 2.2                                  | 2.4  | 2.8  | 3.5  | 5.2     |
| van Dam                    | eFigure 23 | total tfa     | 0.70%    | 1.00%        | 1.30% | 1.50%        | 2.00%         | 1.30%    |                                      |      |      |      |         |
| Song                       | eFigure 23 | total tfa     | 0.56%    | 0.82%        | 1.05% | 1.33%        | 1.83%         | 1.27%    | 1.12                                 | 1.64 | 2.09 | 2.65 | 3.66    |
| Simila                     | eFigure 23 | total tfa     |          |              |       |              | 1% energy     | 1.00%    |                                      |      |      |      |         |
| Wang                       | eFigure 23 | total tfa     |          |              |       |              | Q4 vs. Q1     |          |                                      |      |      |      |         |
| <b>INDUSTRIAL TFA</b>      |            |               |          |              |       |              |               |          |                                      |      |      |      |         |
| <b>all-cause mortality</b> |            |               |          |              |       |              |               |          |                                      |      |      |      |         |
| Laake M+W                  | no figure  | PHVO          | 0.08%    | 0.40%        | 0.90% | 1.40%        | 2.15%         | 2.08%    |                                      |      |      |      |         |
| Laake W+M                  | no figure  | PHFO          | 0.43%    | 1.10%        | 1.60% | 2.10%        | 2.85%         | 2.43%    |                                      |      |      |      |         |
| <b>CHD mortality</b>       |            |               |          |              |       |              |               |          |                                      |      |      |      |         |
| Laake M+W                  | eFigure 25 | PHVO          | 0.08%    | 0.40%        | 0.90% | 1.40%        | 2.15%         | 2.08%    |                                      |      |      |      |         |
| Laake W+M                  | eFigure 25 | PHFO          | 0.43%    | 1.10%        | 1.60% | 2.10%        | 2.85%         | 2.43%    |                                      |      |      |      |         |
| Pietinen                   | eFigure 25 | Vegetable TFA | 0.04%    | 0.17%        | 0.34% | 0.69%        | 2.19%         | 2.14%    | 0.1                                  | 0.4  | 0.8  | 1.6  | 5.1     |
| Pietinen                   | no figure  | elaidic acid  | 0.56%    | 0.73%        | 0.86% | 1.16%        | 2.40%         | 1.84%    | 1.3                                  | 1.7  | 2    | 2.7  | 5.6     |



| Study                      | figure     | Measure           | % energy |       |       |       |                | grams    |        |       |       |       |         |
|----------------------------|------------|-------------------|----------|-------|-------|-------|----------------|----------|--------|-------|-------|-------|---------|
|                            |            |                   | Lowest   | Q2    | Q3    | Q4    | Highest        | Contrast | Lowest | Q2    | Q3    | Q4    | Highest |
| <b>CHD total</b>           |            |                   |          |       |       |       |                |          |        |       |       |       |         |
| Willett                    | eFigure 29 | Vegetable TFA     | 0.72%    | 0.97% | 1.22% | 1.46% | 1.71%          | 0.99%    | 1.44   | 1.935 | 2.43  | 2.925 | 3.42    |
| Oomen                      | eFigure 29 | Manufactured TFA  |          |       |       |       | 2% contrast    | 2%       |        |       |       |       |         |
| <b>RUMINANT TFA</b>        |            |                   |          |       |       |       |                |          |        |       |       |       |         |
| <b>all-cause mortality</b> |            |                   |          |       |       |       |                |          |        |       |       |       |         |
| Laake M                    | eFigure 33 | ruminant TFA      | 0.20%    | 0.47% | 0.62% | 0.77% | 1.00%          | 0.80%    |        |       |       |       |         |
| Laake W                    | eFigure 33 | ruminant TFA      | 0.20%    | 0.47% | 0.62% | 0.77% | 1.00%          | 0.80%    |        |       |       |       |         |
| <b>CHD mortality</b>       |            |                   |          |       |       |       |                |          |        |       |       |       |         |
| Pietinen                   | eFigure 35 | ruminant TFA      | 0.26%    | 0.47% | 0.64% | 0.81% | 1.07%          | 0.81%    | 0.6    | 1.1   | 1.5   | 1.9   | 2.5     |
| Laake M                    | eFigure 35 | ruminant TFA      | 0.20%    | 0.47% | 0.62% | 0.77% | 1.00%          | 0.80%    |        |       |       |       |         |
| Laake W                    | eFigure 35 | ruminant TFA      | 0.20%    | 0.47% | 0.62% | 0.77% | 1.00%          | 0.80%    |        |       |       |       |         |
| <b>CHD total</b>           |            |                   |          |       |       |       |                |          |        |       |       |       |         |
| Willett 1993               | eFigure 37 | ruminant TFA      | 0.48%    | 0.65% | 0.81% | 0.98% | 1.14%          | 0.66%    | 0.96   | 1.29  | 1.62  | 1.95  | 2.28    |
| Oomen 2001                 | eFigure 37 | ruminant TFA      |          |       |       |       | 0.75% contrast | 0.75%    |        |       |       |       |         |
| Jakobsen W                 | eFigure 37 | ruminant TFA      | 0.35%    | 0.55% | 0.75% | 0.95% | 1.35%          | 1.00%    | 0.7    | 1.1   | 1.5   | 1.9   | 2.7     |
| Jakobsen M                 | eFigure 37 | ruminant TFA      | 0.34%    | 0.56% | 0.77% | 1.03% | 1.46%          | 1.11%    | 0.8    | 1.3   | 1.8   | 2.4   | 3.4     |
| <b>type 2 diabetes</b>     |            |                   |          |       |       |       |                |          |        |       |       |       |         |
| Mozaffarian 2010           | eFigure 41 | trans-palmitoleic |          |       |       |       |                |          |        |       |       |       |         |
| Mozaffarian 2013           | eFigure 41 | trans-palmitoleic |          |       |       |       |                |          |        |       |       |       |         |
| Sartaren                   | eFigure 41 | trans-palmitoleic |          |       |       |       |                |          |        |       |       |       |         |
| Yakoob                     | eFigure 41 | trans-palmitoleic |          |       |       |       |                |          |        |       |       |       |         |
| Wang                       | eFigure 41 | trans-palmitoleic | 0.94%    | 1.42% | 1.89% | 2.44% | 2.98%          |          | 1.8875 |       | 3.775 |       | 5.95    |
