# Supplementary material
Source: PubMed Central journal article supplement (PMC4784800)
Supplement: sour025275.ww4_default.pdf [file sour025275.ww4_default.pdf]

**Appendix 4:**

Supplementary Figures

*(posted as supplied by authors)*

## Contents

1. **eFigure 1.** Summary most-adjusted relative risks of saturated fat and all-cause mortality. (p6)
2. **eFigure 2.** Summary least-adjusted relative risks of saturated fat and all-cause mortality. (p6)
3. **eFigure 3.** Summary most-adjusted relative risks of saturated fat and CHD and CVD mortality. CHD mortality defined as fatal MI, fatal coronary event or sudden cardiac death. CVD mortality defined as CHD+stroke or other vascular disease. (\*Estimates as reported by Siri-Tarino et al.<sup>5</sup>) (p7)
4. **eFigure 4.** Summary least-adjusted relative risks of saturated fat and CHD and CVD mortality. CHD mortality defined as fatal MI, fatal coronary event or sudden cardiac death. CVD mortality defined as CHD+stroke or other vascular disease. (\*Estimates as reported by Siri-Tarino et al.<sup>5</sup>) (p8)
5. **eFigure 5.** Summary most-adjusted relative risks of saturated fat and total CHD (p9)
6. **eFigure 6.** Summary least-adjusted relative risks of saturated fat and total CHD (p9)
7. **eFigure 7.** Summary most-adjusted relative risk of saturated fat and total ischemic stroke. \*Data obtained from published RR in Siri Tarino et al. (p10)
8. **eFigure 8.** Summary least adjusted relative risk of saturated fat and total ischemic stroke. \*Data obtained from published RR in Siri Tarino et al. (p10)
9. **eFigure 9.** Summary most-adjusted RR of saturated fat and type 2 diabetes. (p11)
10. **eFigure 10.** Summary least adjusted relative risk of saturated fat and type 2 diabetes (p11)
11. **eFigure 11.** Pooled (Random Effects) most-adjusted relative risk of total *trans* fats and all-cause mortality in 2 published prospective cohort studies (2 comparisons). (p11)
12. **eFigure 12.** Pooled (Fixed Effect) most-adjusted relative risk of total *trans* fats and all-cause mortality in 2 published prospective cohort studies (2 comparisons). (p12)
13. **eFigure 13.** Pooled (Random Effects) least-adjusted relative risk of total *trans* fats and all-cause mortality in 2 published prospective cohort studies (2 comparisons). (p12)
14. **eFigure 14.** Pooled (Fixed Effect) least-adjusted relative risk of total *trans* fats and all-cause mortality in 2 published prospective cohort studies (2 comparisons). (p12)
15. **eFigure 15.** Pooled (random-effects) most-adjusted relative risk of total *trans*-fat and CHD mortality in 6 prospective cohort studies. (p12)
16. **eFigure 16.** Pooled least-adjusted relative risk of total *trans*-fat and CHD mortality in 6 prospective cohort studies. (p13)
17. **eFigure 17.** Pooled most-adjusted relative risk of total *trans*-fat and CHD mortality in 6 published prospective cohort studies, and 3 unpublished analyses. (p13)
18. **eFigure 18.** Pooled least-adjusted relative risk of total *trans*-fat and CHD mortality in 5 published prospective cohort studies, and 3 unpublished analyses. (p13)
19. **eFigure 19.** Pooled most-adjusted relative risk of total *trans*-fat and total CHD in 6 published prospective cohort studies (7 comparisons). (p14)
20. **eFigure 20.** Pooled least-adjusted relative risk of total *trans*-fat and total CHD in 7 prospective cohort studies. (p14)
21. **eFigure 21.** Pooled most-adjusted relative risks of total *trans*-fat and ischaemic stroke in 3 prospective cohort studies. (p14)
22. **eFigure 22.** Pooled least-adjusted relative risks of total *trans*-fat and ischemic stroke in 3 prospective cohort studies. (p15)
23. **eFigure 23.** Pooled most-adjusted relative risks of total *trans*-fat and type 2 diabetes in 6 prospective cohort studies. (p15)

24. **eFigure 24.** Pooled least-adjusted relative risks of total *trans*-fat and type 2 diabetes in 6 prospective cohort studies (p15)
25. **eFigure 25.** Pooled (Random Effects) most-adjusted relative risks of industrial *trans*-fat and CHD mortality in 2 prospective cohort studies. (PHO= partially-hydrogenated oils: the pooled estimate of partially hydrogenated fish oils [PHFO] and partially-hydrogenated vegetable oils [PHVO]) (p16)
26. **eFigure 26.** Pooled (Fixed Effect) most-adjusted relative risks of industrial *trans*-fat and CHD mortality in 2 prospective cohort studies. (PHO= partially-hydrogenated oils: the pooled estimate of partially hydrogenated fish oils [PHFO] and partially-hydrogenated vegetable oils [PHVO]) (p16)
27. **eFigure 27.** Pooled (Random Effects) least-adjusted relative risks of industrial *trans*-fat and CHD mortality in 2 prospective cohort studies. (PHO= partially-hydrogenated oils: the pooled estimate of partially hydrogenated fish oils [PHFO] and partially-hydrogenated vegetable oils [PHVO]) (p16)
28. **eFigure 28.** Pooled (Random Effects) least-adjusted relative risks of industrial *trans*-fat and CHD mortality in 2 prospective cohort studies. (PHO= partially-hydrogenated oils: the pooled estimate of partially hydrogenated fish oils [PHFO] and partially-hydrogenated vegetable oils [PHVO]) (p16)
29. **eFigure 29.** Pooled (Random effects) most-adjusted relative risks of industrial *trans*-fat and CHD in 2 prospective cohort studies. (p17)
30. **eFigure 30.** Pooled (Fixed effect) most-adjusted relative risks of industrial *trans*-fat and CHD in 2 prospective cohort studies. (p17)
31. **eFigure 31.** Pooled (Random effects) least-adjusted relative risks of industrial *trans*-fat and CHD in 2 prospective cohort studies. (p17)
32. **eFigure 32.** Pooled (Fixed effect) least-adjusted relative risks of industrial *trans*-fat and CHD in 2 prospective cohort studies. (p17)
33. **eFigure 33.** Pooled (random effects) most-adjusted relative risk of ruminant *trans*-fat and total mortality in 1 prospective cohort studies (2 comparisons). (p18)
34. **eFigure 34.** Pooled (fixed effect) most-adjusted relative risk of ruminant *trans*-fat and total mortality in 1 prospective cohort studies (2 comparisons). (p18)
35. **eFigure 35.** Pooled (random effects) most-adjusted relative risk of ruminant *trans*-fat and CHD mortality in 2 prospective cohort studies (3 comparisons). (p18)
36. **eFigure 36.** Pooled (fixed effect) most-adjusted relative risk of ruminant *trans*-fat and CHD mortality in 2 prospective cohort studies (3 comparisons). (p18)
37. **eFigure 37.** Pooled (random effects) most-adjusted relative risks of ruminant *trans*-fat and CHD in 3 prospective cohort studies. (p19)
38. **eFigure 38.** Pooled (fixed effect) most-adjusted relative risks of ruminant *trans*-fat and CHD in 3 prospective cohort studies. (p19)
39. **eFigure 39.** Pooled least-adjusted (random-effects) relative risks of ruminant *trans*-fat and CHD in 3 prospective cohort studies. (p19)
40. **eFigure 40.** Pooled least-adjusted (fixed effect) relative risks of ruminant *trans*-fat and CHD in 3 prospective cohort studies. (p19)
41. **eFigure 41.** Pooled most-adjusted (random effects) relative risks of *trans* palmitoleic acid and type 2 diabetes in 5 prospective cohort studies. (p20)
42. **eFigure 42.** Pooled most-adjusted (fixed effect) relative risks of *trans* palmitoleic acid and type 2 diabetes in 3 prospective cohort studies. (p20)
43. **eFigure 43.** Pooled most-adjusted (random effects) odds ratios of *trans*-18:2 fatty acids and CHD in 6 retrospective case-control studies. (p20)

- 44. eFigure 44.** Pooled most-adjusted (random effects) odds ratios of trans-18:1 fatty acids and CHD in 6 retrospective case-control studies. (p21)
- 45. eFigure 45.** Pooled most-adjusted (random effects) multivariable relative risk of CHD mortality associated with a  $\approx 0.8\%$  increase in *trans* fatty acids (vs. referent group) in 5 prospective cohort studies. (p21)
- 46. eFigure 46.** Pooled most-adjusted (random effects) multivariable relative risk of CHD mortality associated with a  $\approx 0.8\%$  increase in *trans* fatty acids (vs. referent group) in 5 published + 2 unpublished prospective cohort studies. (p21)
- 47. eFigure 47.** Pooled most-adjusted (random effects) multivariable relative risk of CHD mortality associated with a  $\approx 1.2\%$  increase in *trans* fatty acids (vs. referent group) in 6 prospective cohort studies. (p22)
- 48. eFigure 48.** Pooled most-adjusted (random effects) odds ratios of total trans-unsaturated fatty acids and CHD in 12 retrospective case-control studies. (p22)
- 49. eFigure 49.** Pooled most-adjusted (random effects) odds ratios of total trans-unsaturated fatty acids and CHD in 6 high-quality retrospective case-control studies. (p22)
- 50. eFigure 50.** Pooled least-adjusted (random effects) odds ratios of total trans-unsaturated fatty acids and CHD in 6 high-quality retrospective case-control studies. (p23)
- 51. eFigure 51.** Pooled most-adjusted (random effects) risk ratios of total trans-unsaturated fatty acids and CHD mortality in 4 prospective cohort and 1 nested case-control study. (p23)
- 52. eFigure 52.** Pooled most-adjusted (random effects) risk ratios of total trans-unsaturated fatty acids and CHD in 6 prospective cohort and 2 nested case-control studies. (M=men; W=women; Circul=citation from journal *Circulation*) (p24)
- 53. eFigure 53.** Pooled most-adjusted (random effects) risk ratios of total trans-unsaturated fatty acids and type 2 diabetes in 5 prospective cohort and 3 nested case-control studies. (PPL=phospholipid; EPPL=erythrocyte phospholipid) (p24)
- 54. eFigure 54.** Pooled most-adjusted (random effects) risk ratios of total saturated fatty acids and CHD mortality in 10 prospective cohort and 1 nested case-control study. (p25)
- 55. eFigure 55.** Pooled most-adjusted (random effects) risk ratios of total saturated fatty acids and CHD in 10 prospective cohort and 2 nested case-control studies. (p26)
- 56. eFigure 56.** Pooled most-adjusted (random effects) risk ratios of total saturated fatty acids and type 2 diabetes in 6 prospective cohort and 2 nested case-control studies. (p27)
- 57. eFigure 57:** Most-adjusted risk ratio of total trans fatty acids and all-cause mortality in 1 prospective cohort study in which the highest category of *trans* fatty acid intake was  $\geq 1\%$  energy. (p28)
- 58. eFigure 58:** Most-adjusted risk ratio of total trans fatty acids and CHD mortality in 5 prospective cohort studies in which the highest category of *trans* fatty acid intake was  $\geq 1\%$  energy. (p28)
- 59. eFigure 59:** Most-adjusted risk ratio of total trans fatty acids and total CHD in 6 prospective cohort studies in which the highest category of *trans* fatty acid intake was  $\geq 1\%$  energy. (p28)
- 60. eFigure 60:** Most-adjusted risk ratio of total trans fatty acids and ischemic stroke in 3 prospective cohort studies in which the highest category of *trans* fatty acid intake was  $\geq 1\%$  energy. (p29)
- 61. eFigure 61:** Most-adjusted risk ratio of total trans fatty acids and type 2 diabetes in 6 prospective cohort studies in which the highest category of *trans* fatty acid intake was  $\geq 1\%$  energy. (p29)
- 62. eFigure 62:** Most-adjusted risk ratio of total trans fatty acids and CHD mortality in 4 prospective cohort studies in which the lowest category of *trans* fatty acid intake was  $< 1\%$  energy. (p30)
- 63. eFigure 63:** Most-adjusted risk ratio of total trans fatty acids and total CHD in 4 prospective cohort studies in which the lowest category of *trans* fatty acid intake was  $< 1\%$  energy. (p30)

- 64. eFigure 64:** Most-adjusted risk ratio of total trans fatty acids and ischemic stroke in 1 prospective cohort study in which the lowest category of *trans* fatty acid intake was <1% energy. (p30)
- 65. eFigure 65 :** Most-adjusted risk ratio of total trans fatty acids and type 2 diabetes in 4 prospective cohort studies in which the lowest category of *trans* fatty acid intake was <1% energy. (p30)
- 66. eFigure 66.** Funnel plot for publication bias (Saturated fat and CHD mortality). Egger's test of no small-study effects: bias term=1.27; P=0.191. Begg's test of no small-study effects: Kendall's score=31 (SD=20.2); P=0.138 (continuity corrected). Trim-and-fill imputed 2 "missed" studies; their inclusion would shift the estimate of association to 1.09 (95% CI: 0.91 to 1.30; P=0.361;  $P_{het}<0.001$ ) (p31)
- 67. eFigure 67.** Funnel plot for publication bias (Saturated fat and CHD total). Egger's test of no small-study effects: bias term=0.75; P=0.394. Begg's test of no small-study effects: Kendall's score=27 (SD=24.3); P=0.284 (continuity corrected). Trim-and-fill imputed 2 "missed" studies; their inclusion would shift the estimate of association to 1.03 (95% CI: 0.92 to 1.15; P=0.586;  $P_{het}=0.003$ ). (p31)
- 68. eFigure 68.** Funnel plot for publication bias (Saturated fat and ischemic stroke). Egger's test of no small-study effects: bias term=-0.26; P=0.665. Begg's test of no small-study effects: Kendall's score=-15 (SD=20.2); P=0.488 (continuity corrected). Trim-and-fill identified no "missed" studies. (p32)

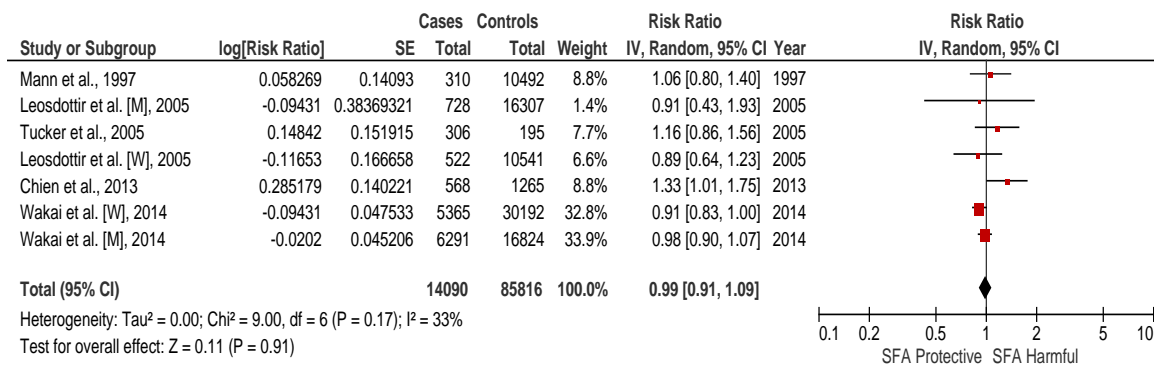

**eFigure 1.** Summary most-adjusted relative risks of saturated fat and all-cause mortality.

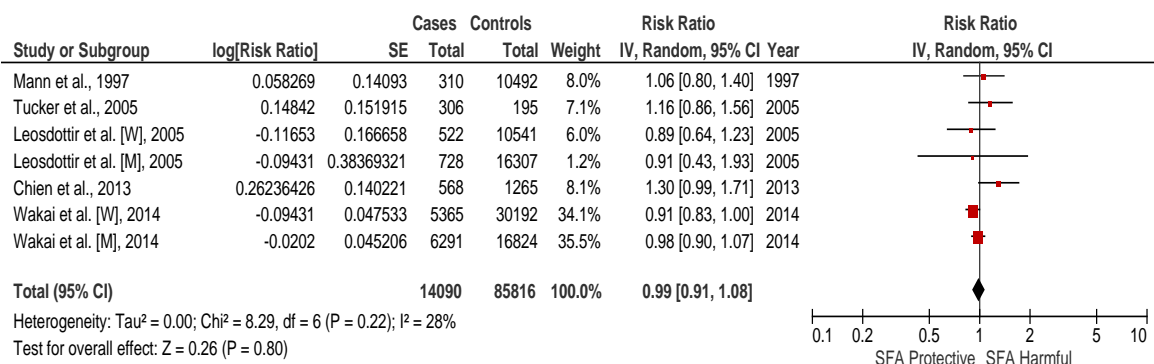

**eFigure 2.** Summary least-adjusted relative risks of saturated fat and all-cause mortality.

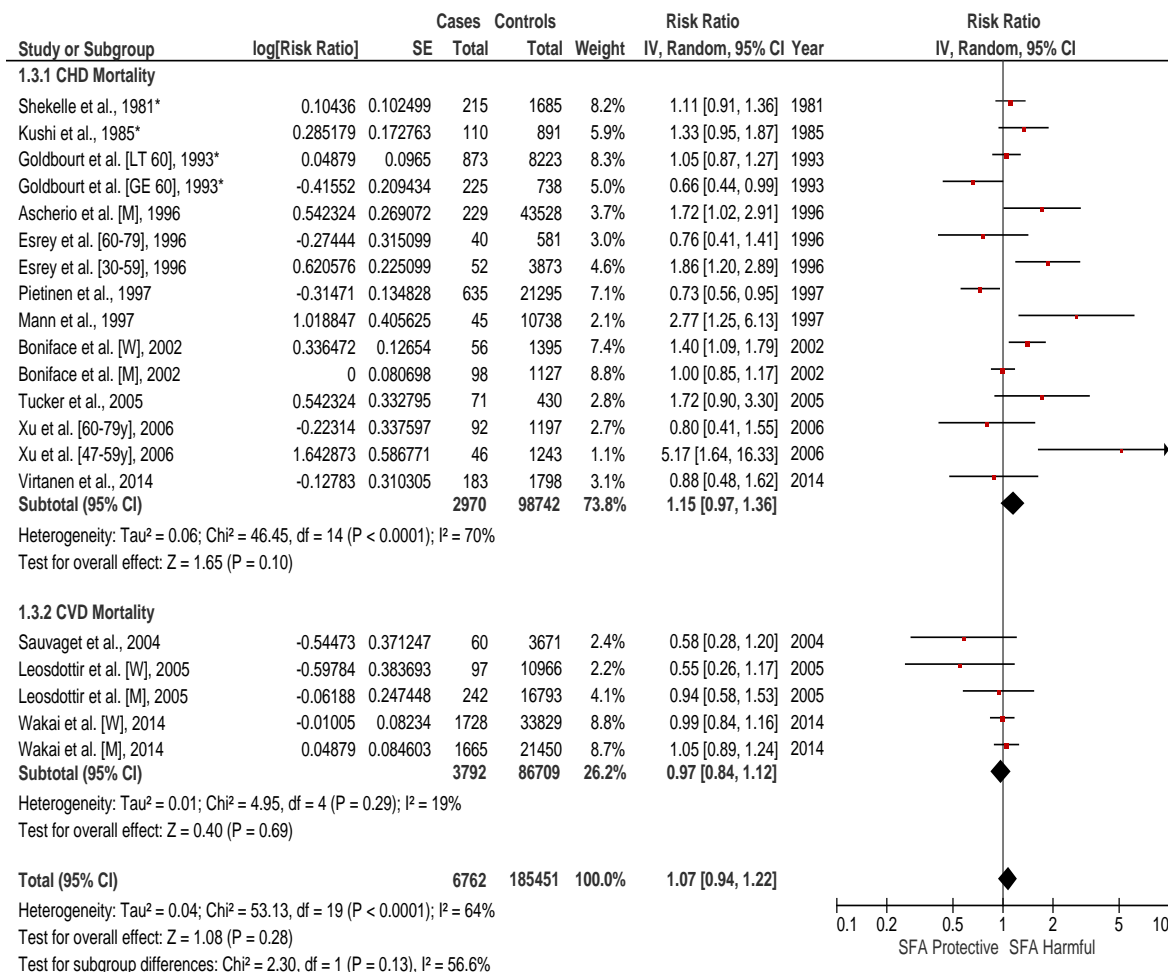

**eFigure 3.** Summary most-adjusted relative risks of saturated fat and CHD and CVD mortality. CHD mortality defined as fatal MI, fatal coronary event or sudden cardiac death. CVD mortality defined as CHD+stroke or other vascular disease. (\*Estimates as reported by Siri-Tarino et al.<sup>5</sup>)

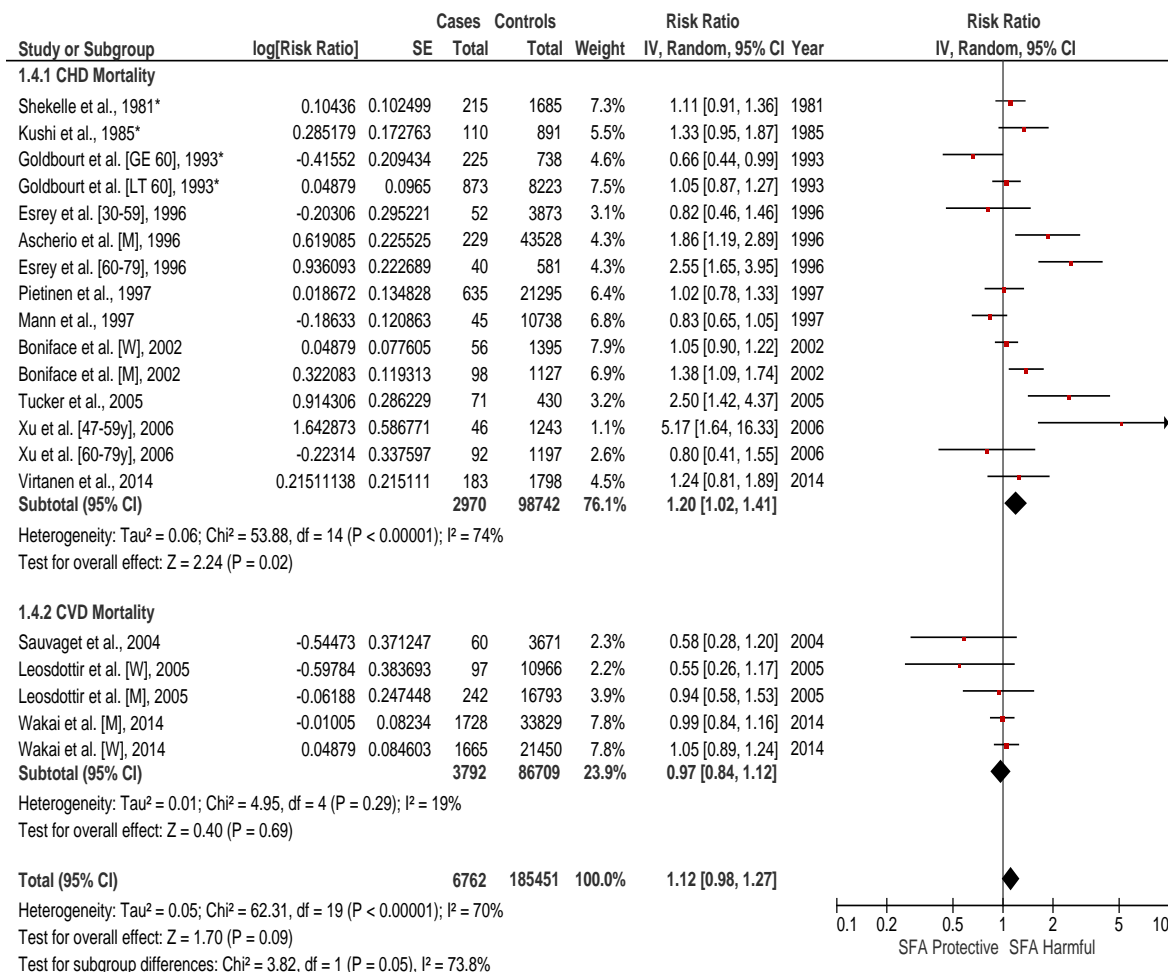

**eFigure 4.** Summary least-adjusted relative risks of saturated fat and CHD and CVD mortality. CHD mortality defined as fatal MI, fatal coronary event or sudden cardiac death. CVD mortality defined as CHD+stroke or other vascular disease. (\*Estimates as reported by Siri-Tarino et al.<sup>5</sup>)



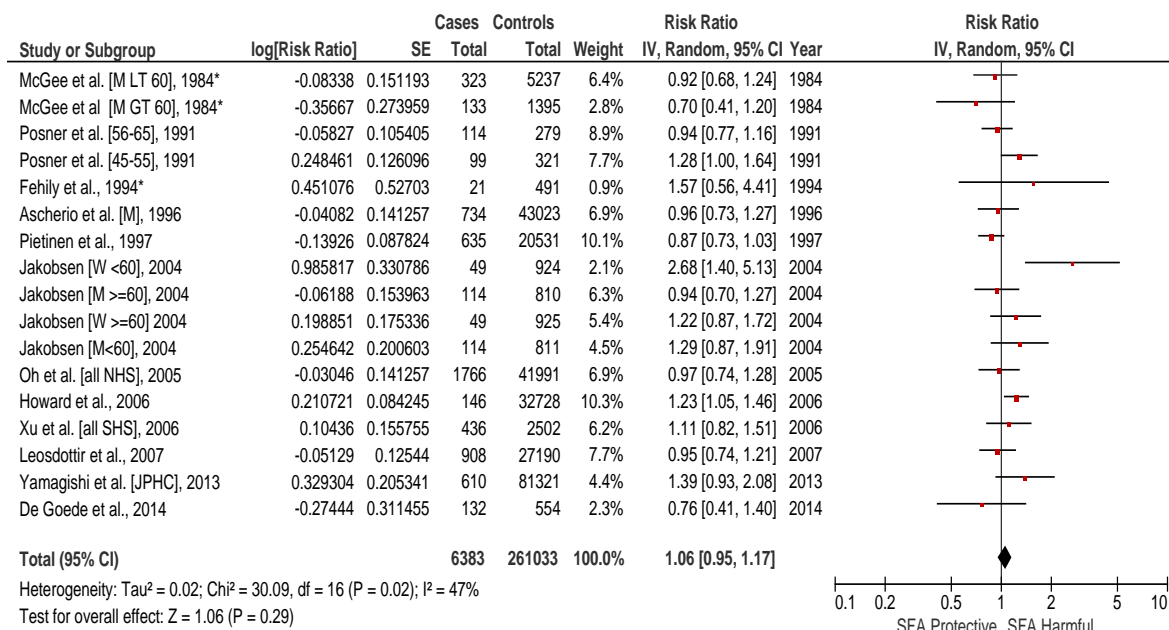

**eFigure 5.** Summary most-adjusted relative risks of saturated fat and total CHD

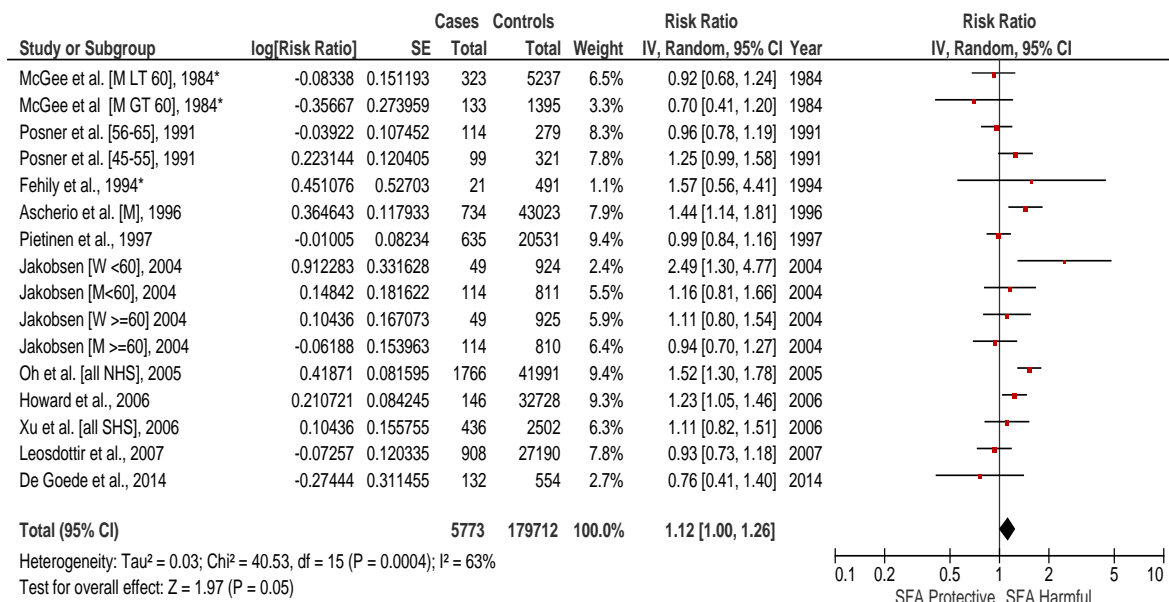

**eFigure 6.** Summary least-adjusted relative risks of saturated fat and total CHD

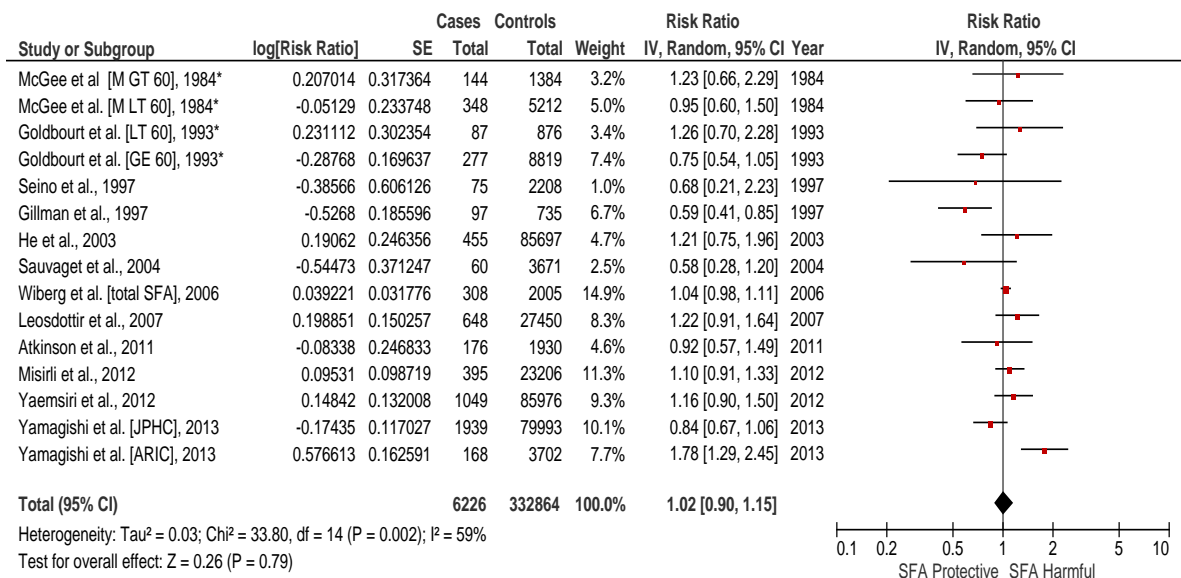

**eFigure 7.** Summary most-adjusted relative risk of saturated fat and total ischemic stroke. \*Data obtained from published RR in Siri Tarino et al.

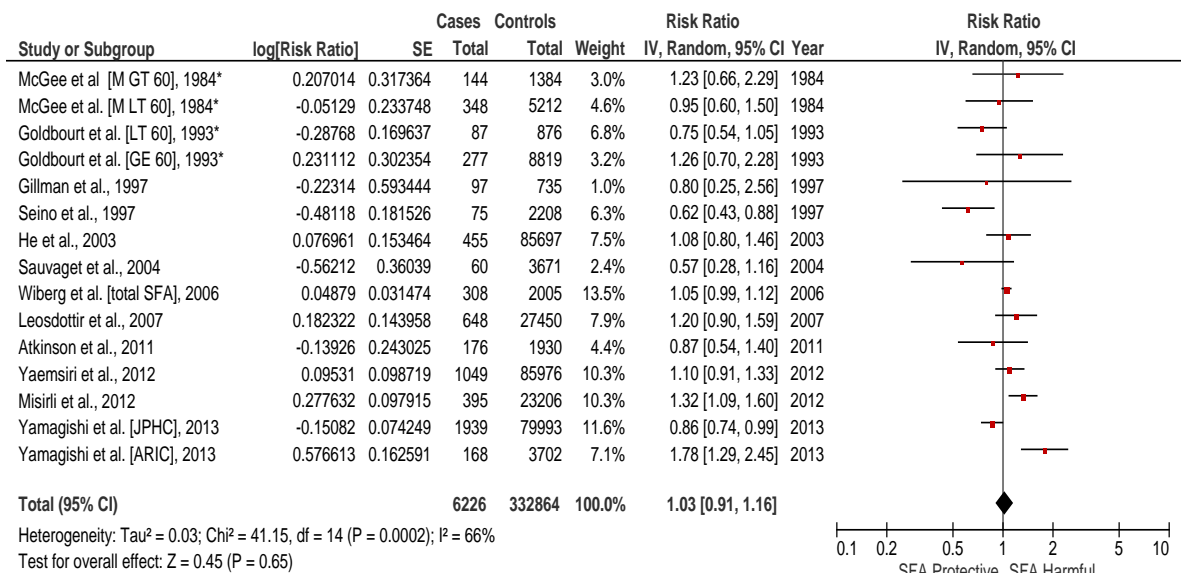

**eFigure 8.** Summary least adjusted relative risk of saturated fat and total ischemic stroke. \*Data obtained from published RR in Siri Tarino et al.

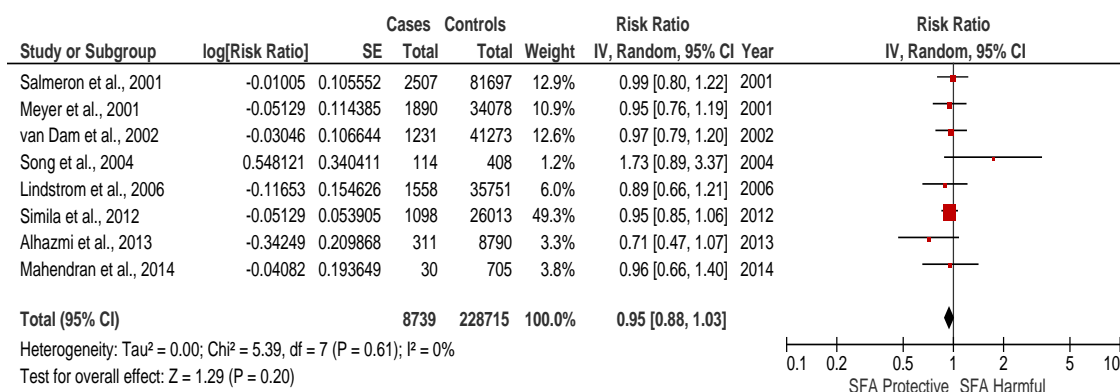

**eFigure 9.** Summary most-adjusted RR of saturated fat and type 2 diabetes.

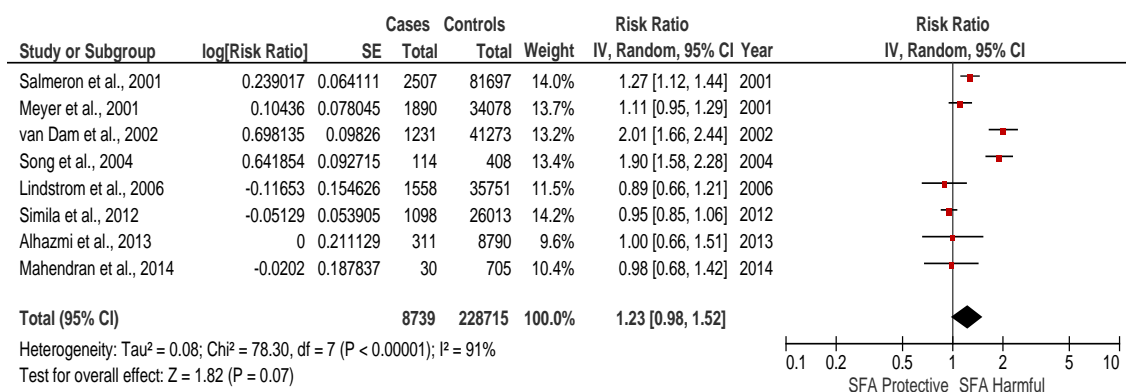

**eFigure 10.** Summary least adjusted relative risk of saturated fat and type 2 diabetes

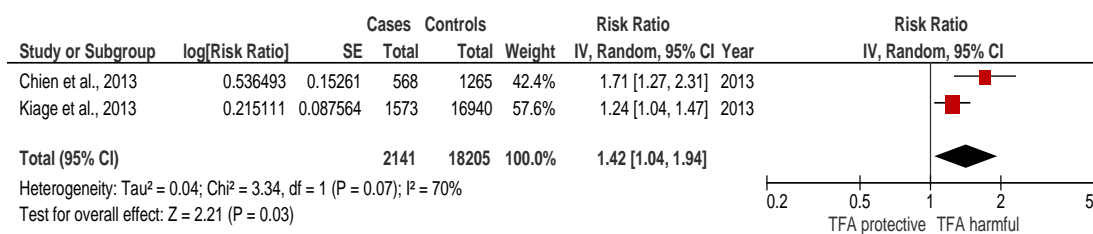

**eFigure 11.** Pooled (Random Effects) most-adjusted relative risk of total *trans* fats and all-cause mortality in 2 published prospective cohort studies (2 comparisons).

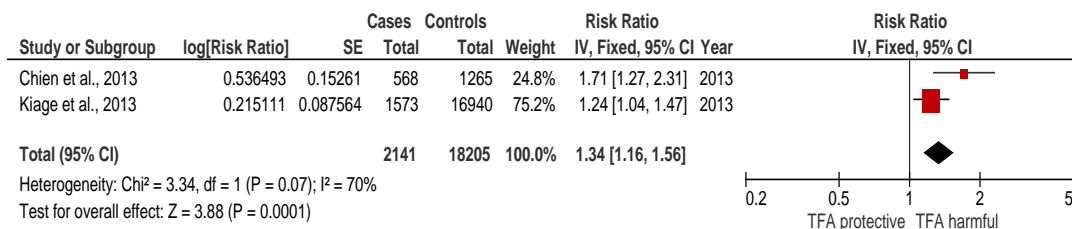

**eFigure 12.** Pooled (Fixed Effect) most-adjusted relative risk of total *trans* fats and all-cause mortality in 2 published prospective cohort studies (2 comparisons).

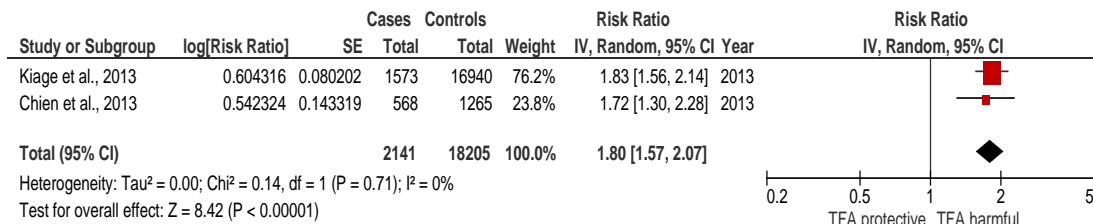

**eFigure 13.** Pooled (Random Effects) least-adjusted relative risk of total *trans* fats and all-cause mortality in 2 published prospective cohort studies (2 comparisons).

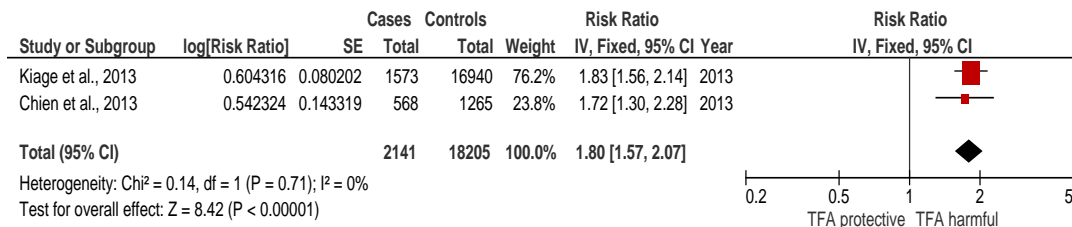

**eFigure 14.** Pooled (Fixed Effect) least-adjusted relative risk of total *trans* fats and all-cause mortality in 2 published prospective cohort studies (2 comparisons).

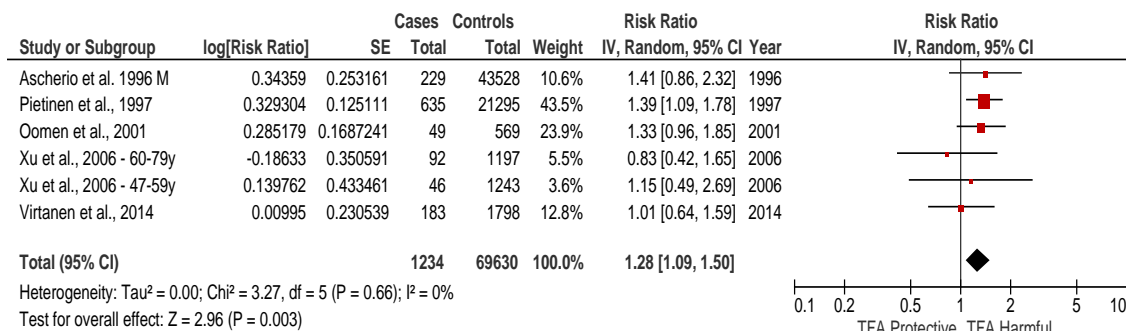

**eFigure 15.** Pooled (random-effects) most-adjusted relative risk of total *trans*-fat and CHD mortality in 6 prospective cohort studies.

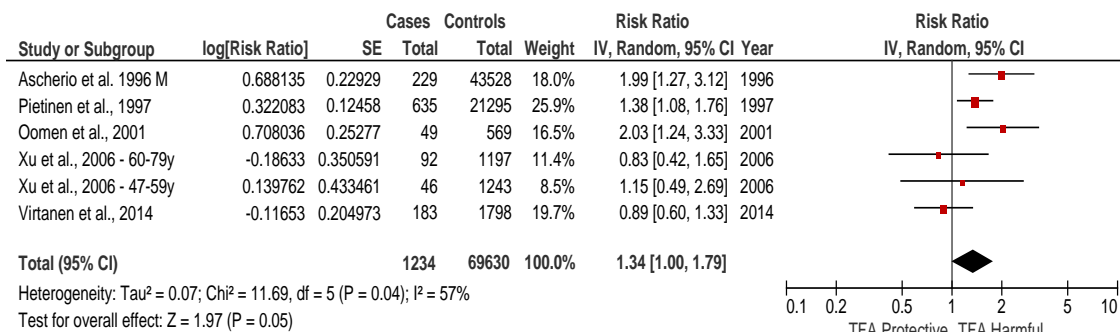

**eFigure 16.** Pooled least-adjusted relative risk of total *trans*-fat and CHD mortality in 6 prospective cohort studies.

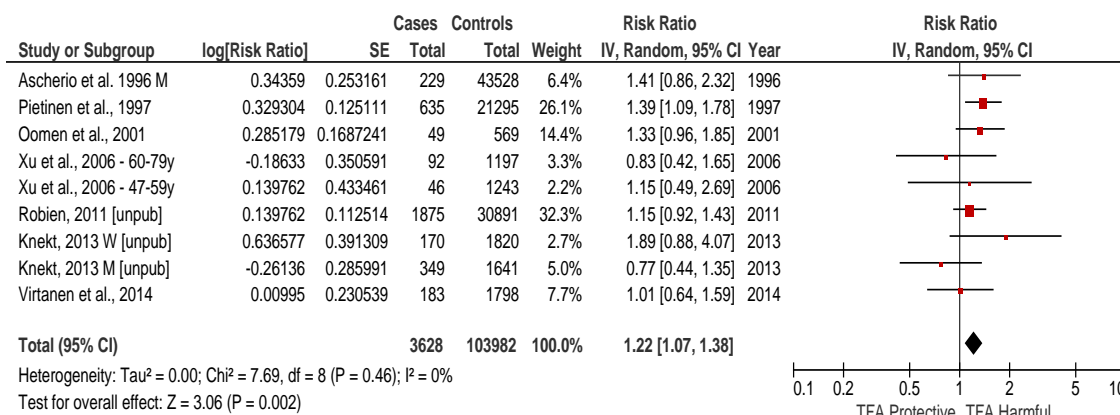

**eFigure 17.** Pooled most-adjusted relative risk of total *trans*-fat and CHD mortality in 6 published prospective cohort studies, and 3 unpublished analyses.

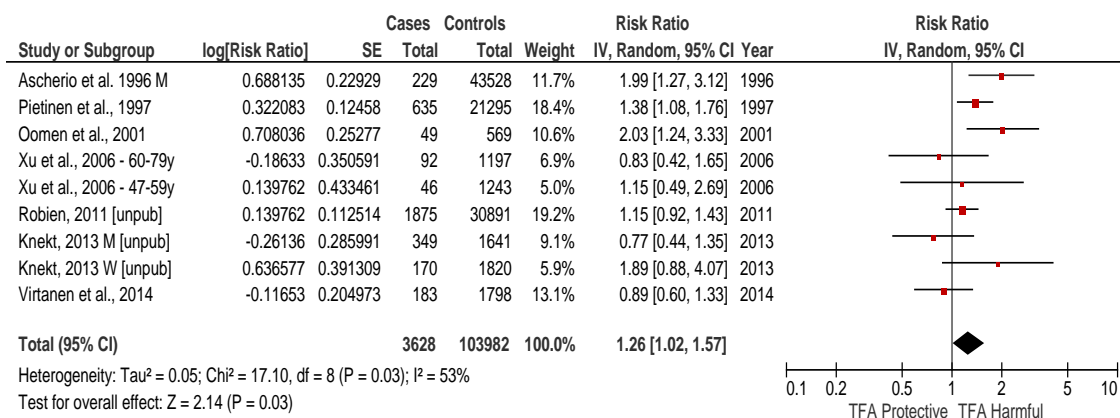

**eFigure 18.** Pooled least-adjusted relative risk of total *trans*-fat and CHD mortality in 5 published prospective cohort studies, and 3 unpublished analyses.

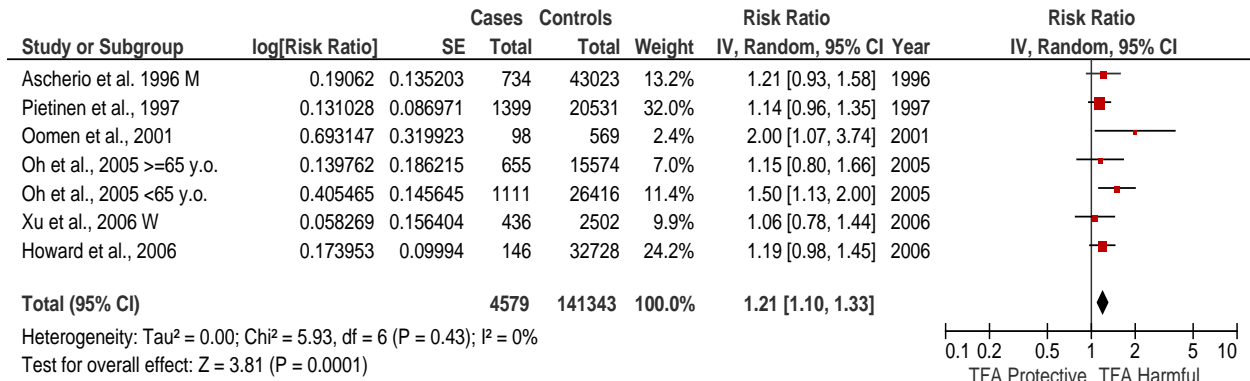

**eFigure 19.** Pooled most-adjusted relative risk of total *trans*-fat and total CHD in 6 published prospective cohort studies (7 comparisons).

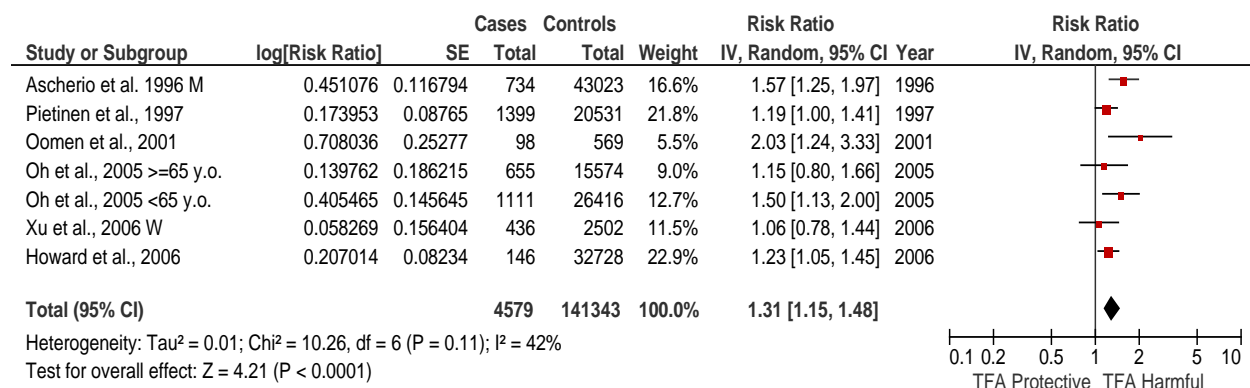

**eFigure 20.** Pooled least-adjusted relative risk of total *trans*-fat and total CHD in 7 prospective cohort studies.

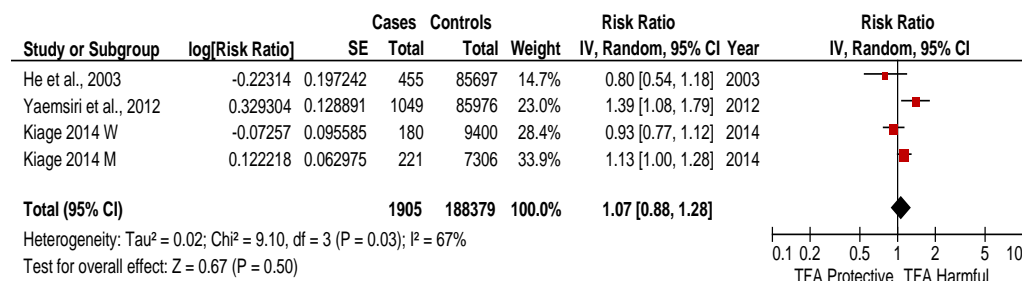

**eFigure 21.** Pooled most-adjusted relative risks of total *trans*-fat and ischaemic stroke in 3 prospective cohort studies.

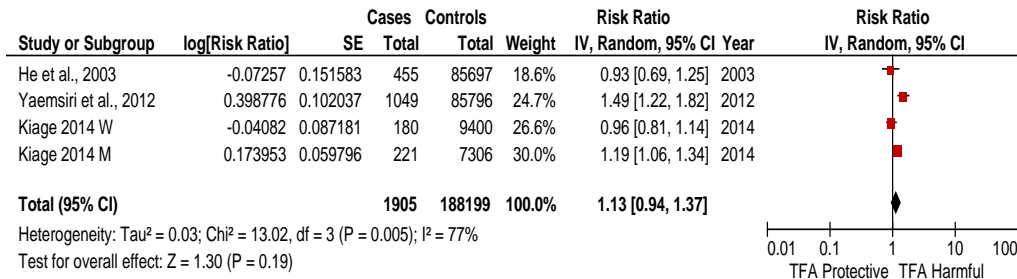

**eFigure 22.** Pooled least-adjusted relative risks of total *trans*-fat and ischemic stroke in 3 prospective cohort studies.

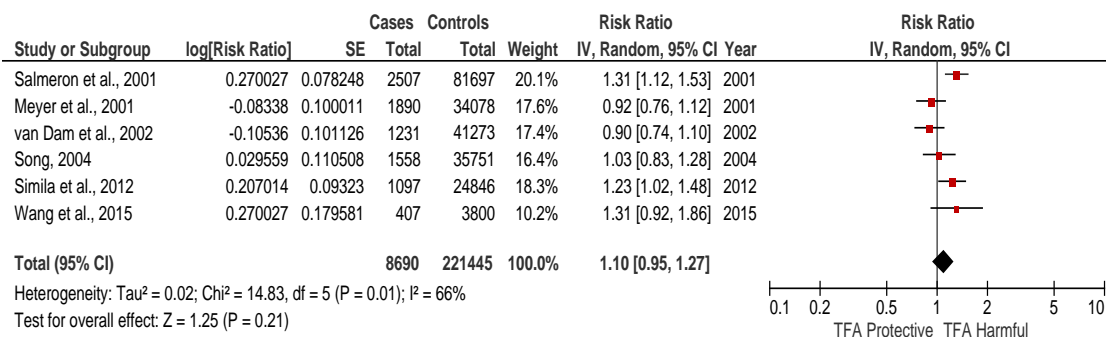

**eFigure 23.** Pooled most-adjusted relative risks of total *trans*-fat and type 2 diabetes in 6 prospective cohort studies.

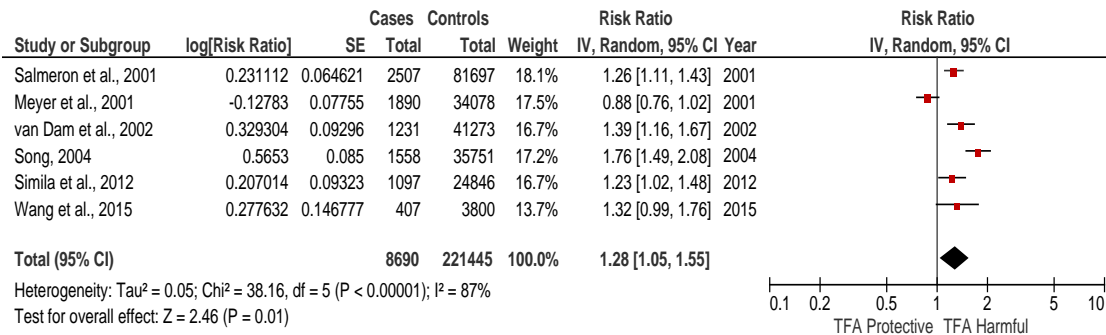

**eFigure 24.** Pooled least-adjusted relative risks of total *trans*-fat and type 2 diabetes in 6 prospective cohort studies

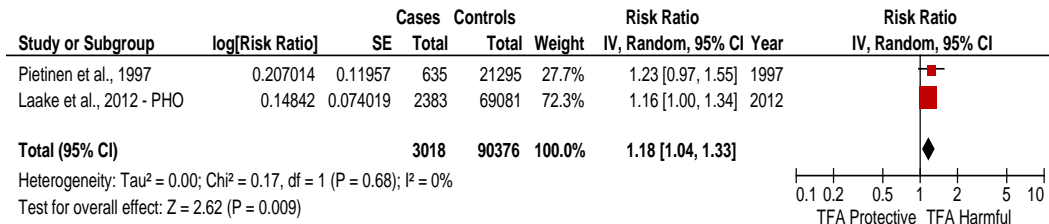

**eFigure 25.** Pooled (Random Effects) most-adjusted relative risks of industrial *trans*-fat and CHD mortality in 2 prospective cohort studies. (PHO= partially-hydrogenated oils: the pooled estimate of partially hydrogenated fish oils [PHFO] and partially-hydrogenated vegetable oils [PHVO])

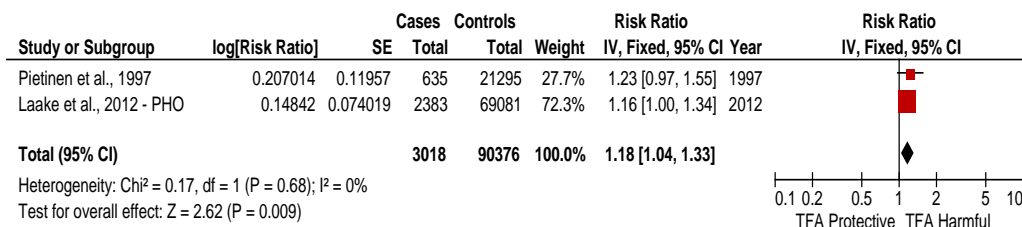

**eFigure 26.** Pooled (Fixed Effect) most-adjusted relative risks of industrial *trans*-fat and CHD mortality in 2 prospective cohort studies. (PHO= partially-hydrogenated oils: the pooled estimate of partially hydrogenated fish oils [PHFO] and partially-hydrogenated vegetable oils [PHVO])

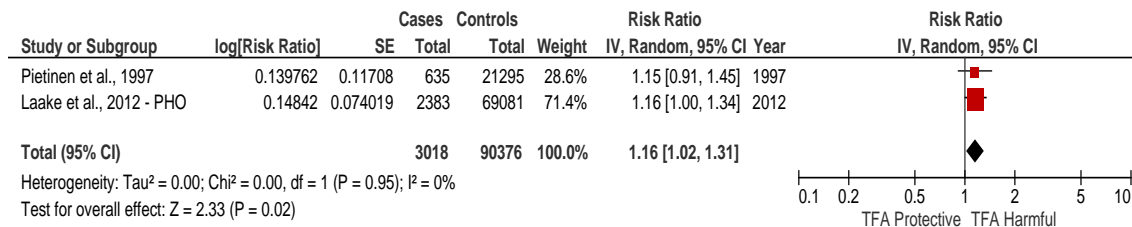

**eFigure 27.** Pooled (Random Effects) least-adjusted relative risks of industrial *trans*-fat and CHD mortality in 2 prospective cohort studies. (PHO= partially-hydrogenated oils: the pooled estimate of partially hydrogenated fish oils [PHFO] and partially-hydrogenated vegetable oils [PHVO])

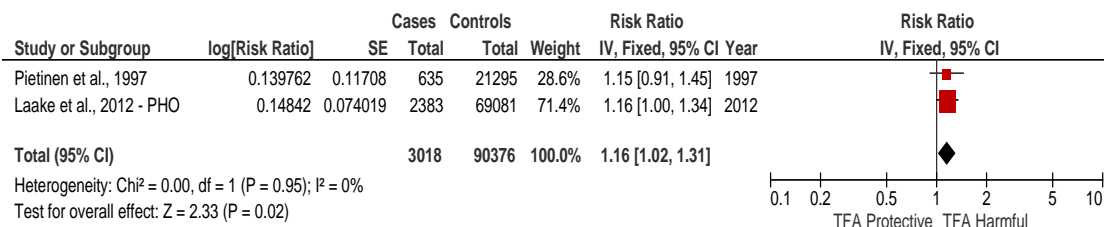

**eFigure 28.** Pooled (Random Effects) least-adjusted relative risks of industrial *trans*-fat and CHD mortality in 2 prospective cohort studies. (PHO= partially-hydrogenated oils: the pooled estimate of partially hydrogenated fish oils [PHFO] and partially-hydrogenated vegetable oils [PHVO])



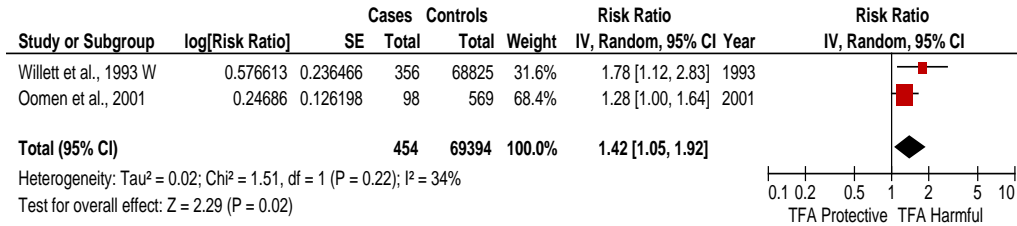

**eFigure 29.** Pooled (Random effects) most-adjusted relative risks of industrial trans-fat and CHD in 2 prospective cohort studies.

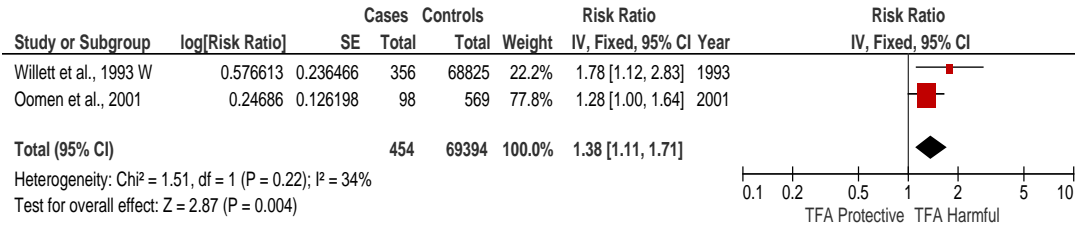

**eFigure 30.** Pooled (Fixed effect) most-adjusted relative risks of industrial trans-fat and CHD in 2 prospective cohort studies.

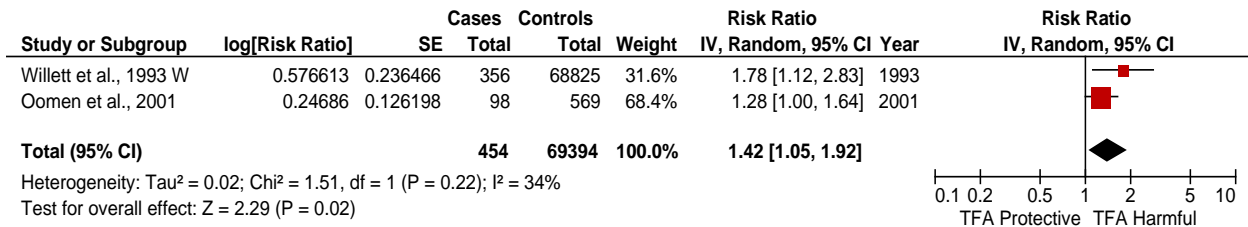

**eFigure 31.** Pooled (Random effects) least-adjusted relative risks of industrial trans-fat and CHD in 2 prospective cohort studies.

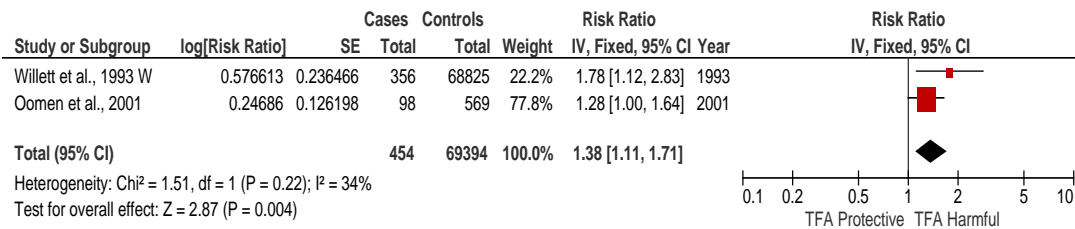

**eFigure 32.** Pooled (Fixed effect) least-adjusted relative risks of industrial trans-fat and CHD in 2 prospective cohort studies.

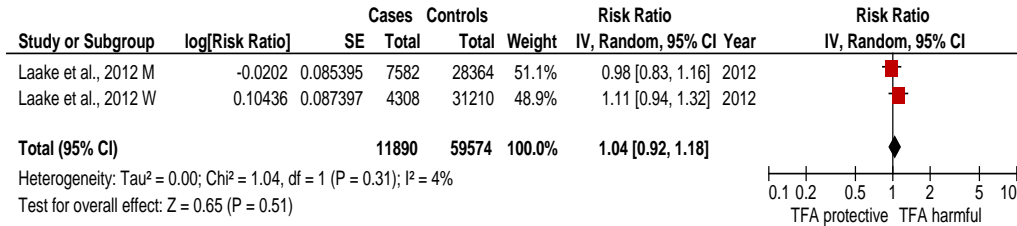

**eFigure 33.** Pooled (random effects) most-adjusted relative risk of ruminant trans-fat and total mortality in 1 prospective cohort studies (2 comparisons).

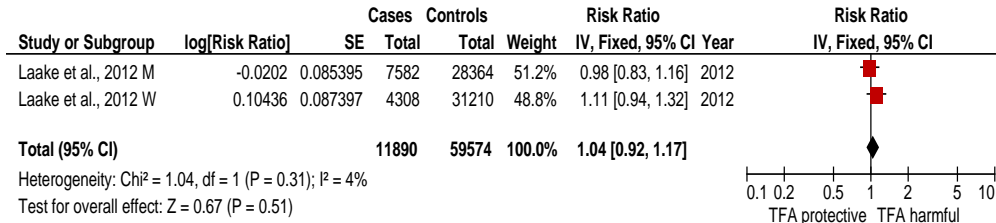

**eFigure 34.** Pooled (fixed effect) most-adjusted relative risk of ruminant trans-fat and total mortality in 1 prospective cohort studies (2 comparisons).

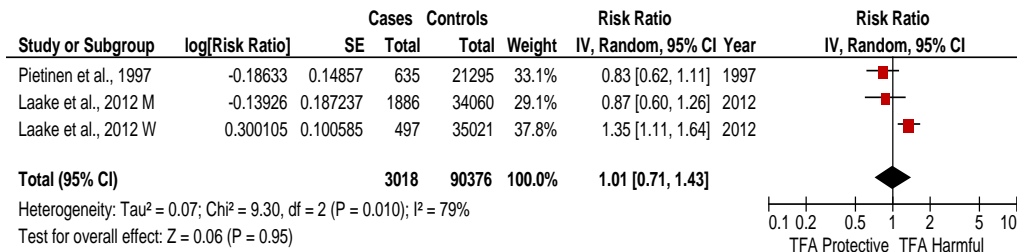

**eFigure 35.** Pooled (random effects) most-adjusted relative risk of ruminant trans-fat and CHD mortality in 2 prospective cohort studies (3 comparisons).

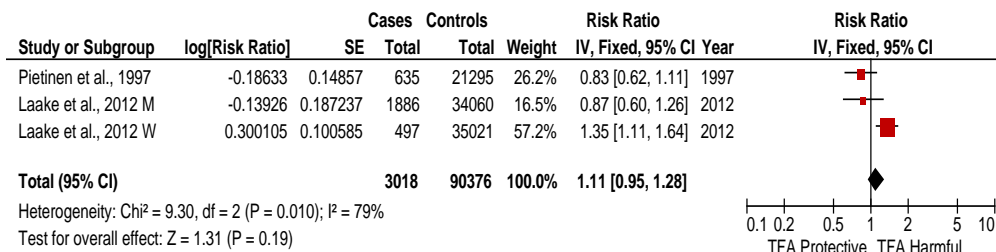

**eFigure 36.** Pooled (fixed effect) most-adjusted relative risk of ruminant trans-fat and CHD mortality in 2 prospective cohort studies (3 comparisons).

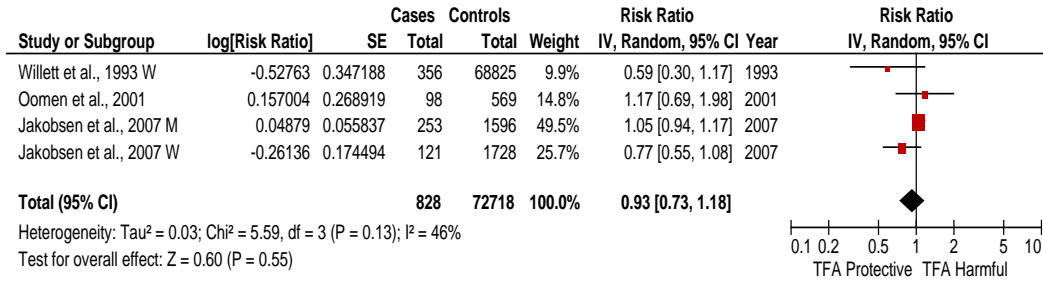

**eFigure 37.** Pooled (random effects) most-adjusted relative risks of ruminant trans-fat and CHD in 3 prospective cohort studies.

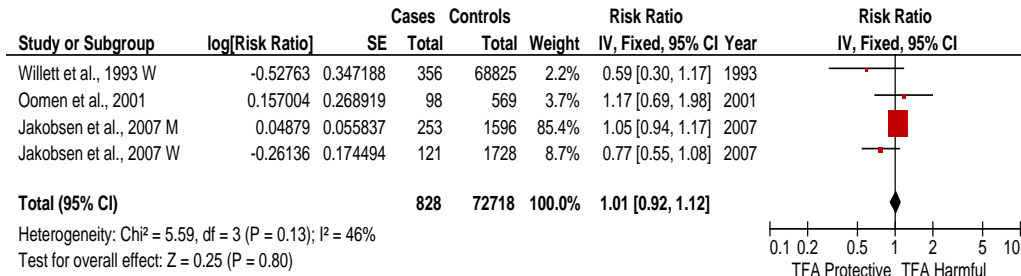

**eFigure 38.** Pooled (fixed effect) most-adjusted relative risks of ruminant trans-fat and CHD in 3 prospective cohort studies.

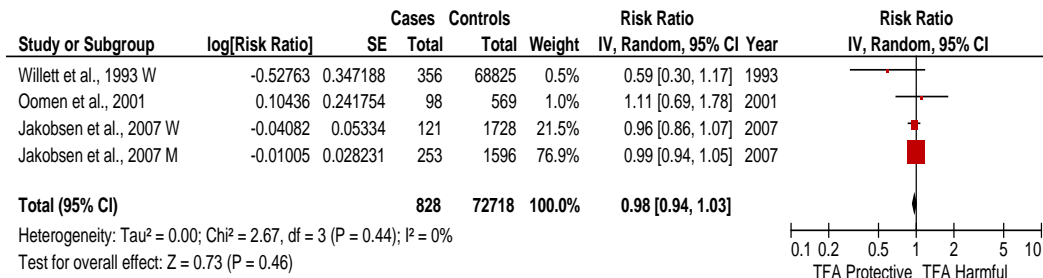

**eFigure 39.** Pooled least-adjusted (random-effects) relative risks of ruminant trans-fat and CHD in 3 prospective cohort studies.

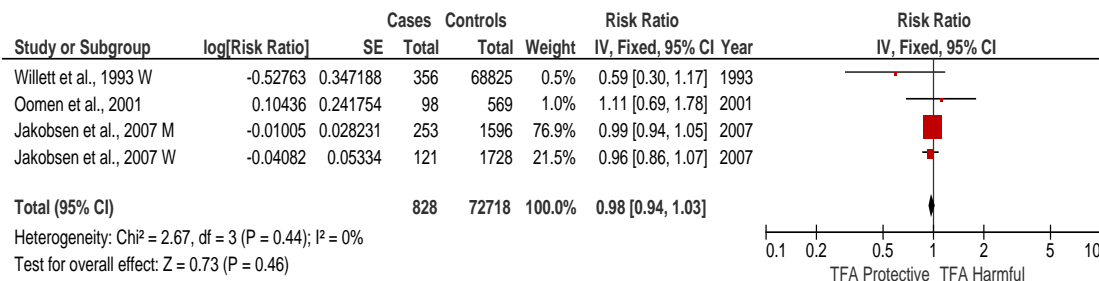

**eFigure 40.** Pooled least-adjusted (fixed effect) relative risks of ruminant trans-fat and CHD in 3 prospective cohort studies.

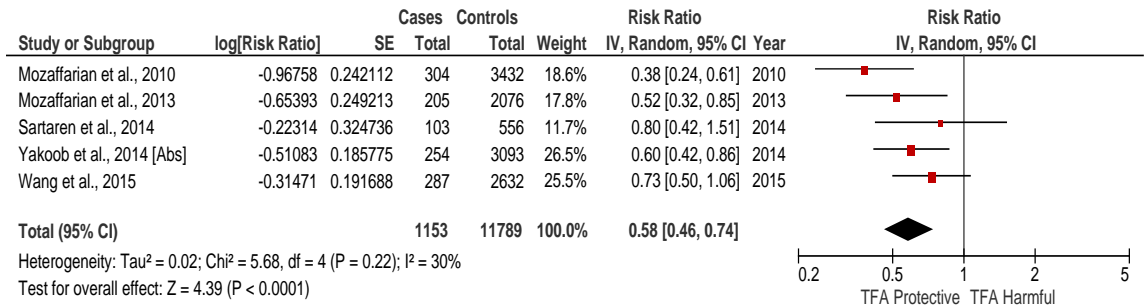

**eFigure 41.** Pooled most-adjusted (random effects) relative risks of trans palmitoleic acid and type 2 diabetes in 5 prospective cohort studies.

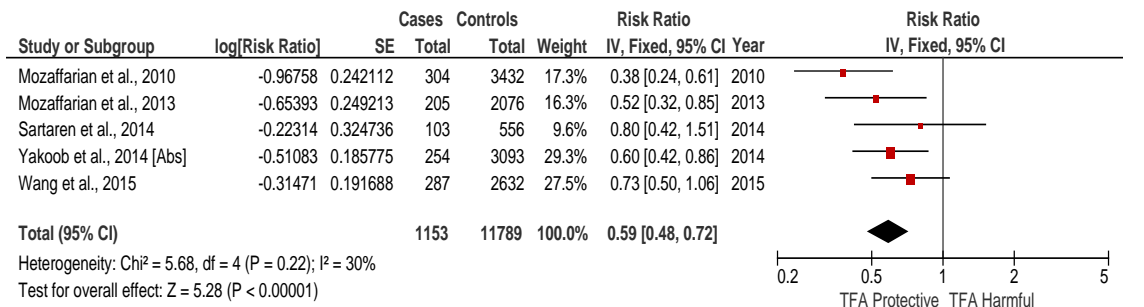

**eFigure 42.** Pooled most-adjusted (fixed effect) relative risks of trans palmitoleic acid and type 2 diabetes in 3 prospective cohort studies.

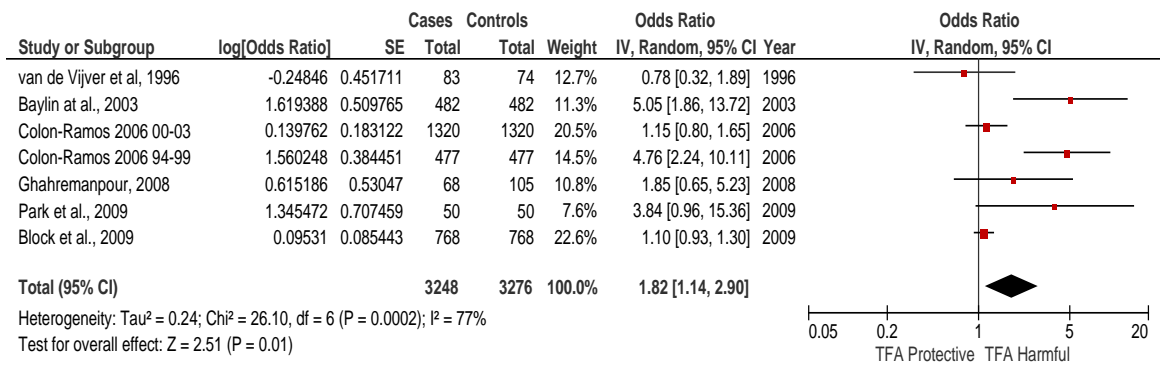

**eFigure 43.** Pooled most-adjusted (random effects) odds ratios of trans-18:2 fatty acids and CHD in 6 retrospective case-control studies.

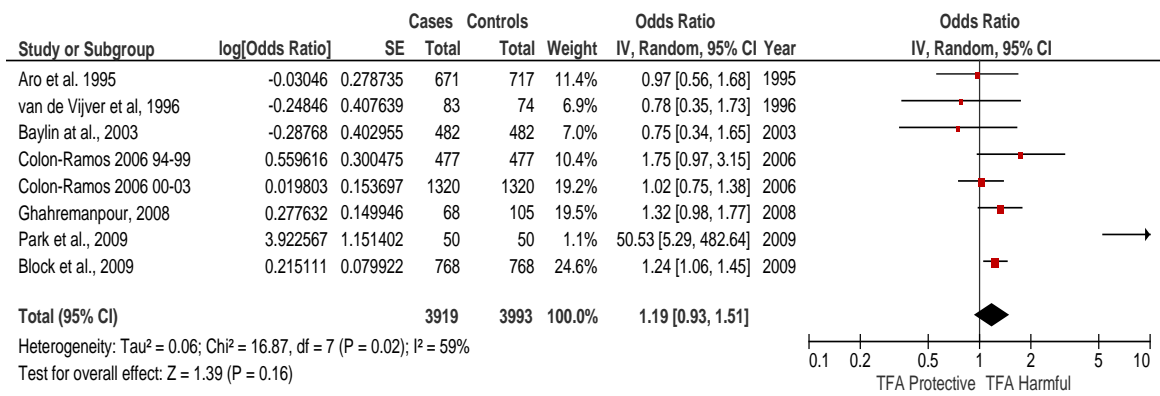

**eFigure 44.** Pooled most-adjusted (random effects) odds ratios of trans-18:1 fatty acids and CHD in 6 retrospective case-control studies.

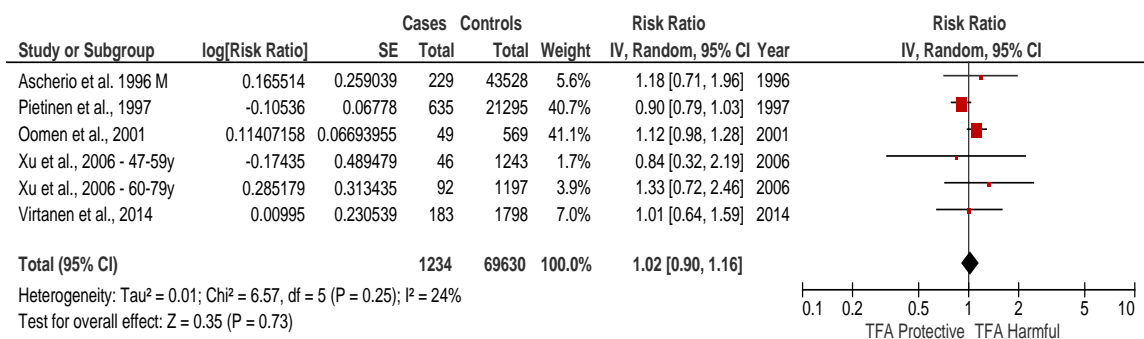

**eFigure 45.** Pooled most-adjusted (random effects) multivariable relative risk of CHD mortality associated with a ~0.8% increase in trans fatty acids (vs. referent group) in 5 prospective cohort studies.

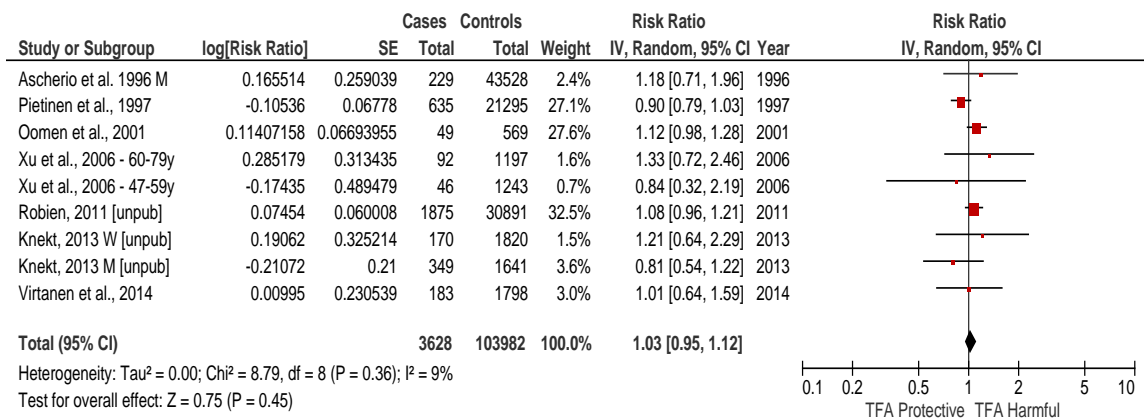

**eFigure 46.** Pooled most-adjusted (random effects) multivariable relative risk of CHD mortality associated with a ~0.8% increase in trans fatty acids (vs. referent group) in 5 published + 2 unpublished prospective cohort studies.

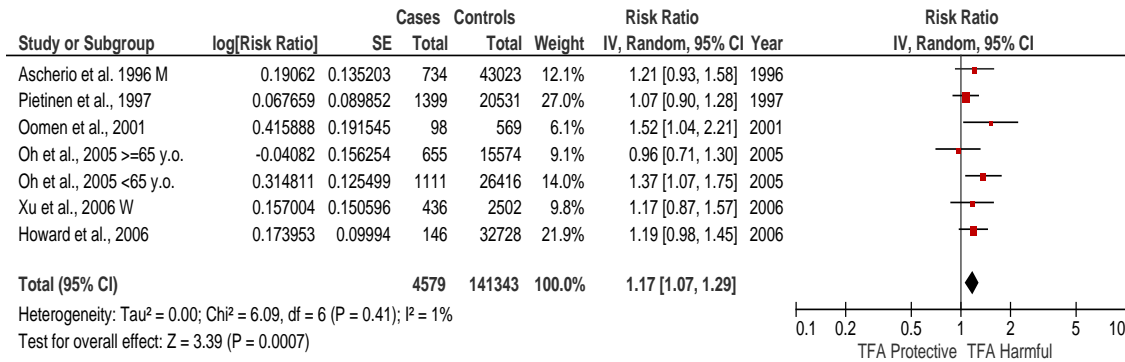

**eFigure 47.** Pooled most-adjusted (random effects) multivariable relative risk of CHD mortality associated with a  $\approx 1.2\%$  increase in *trans* fatty acids (vs. referent group) in 6 prospective cohort studies.

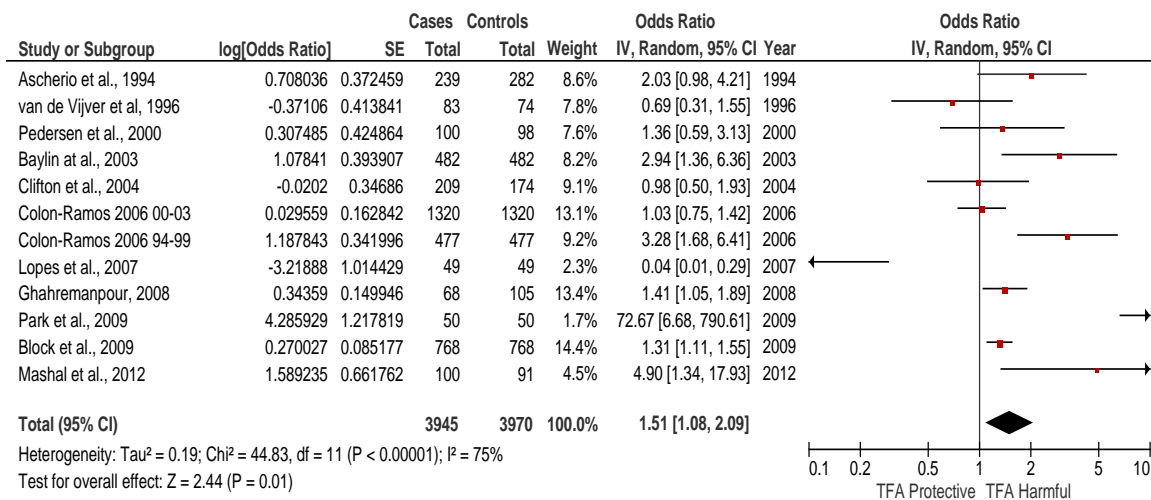

**eFigure 48.** Pooled most-adjusted (random effects) odds ratios of total trans-unsaturated fatty acids and CHD in 12 retrospective case-control studies.

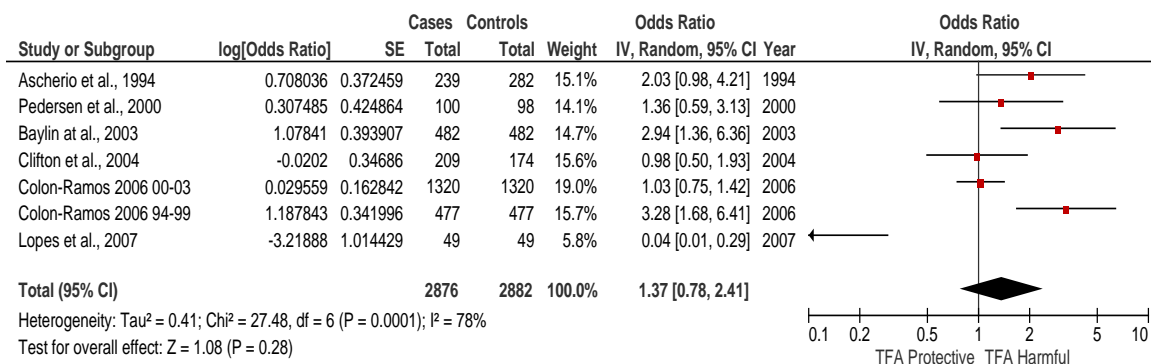

**eFigure 49.** Pooled most-adjusted (random effects) odds ratios of total trans-unsaturated fatty acids and CHD in 6 high-quality retrospective case-control studies.

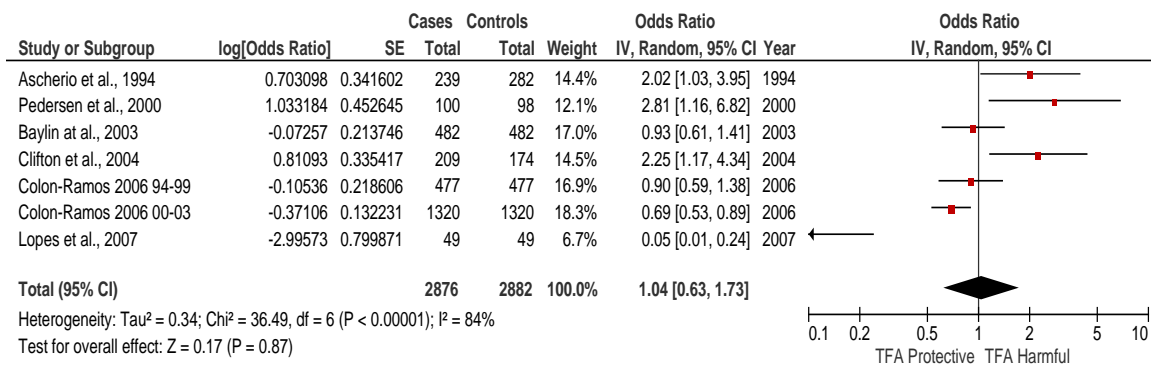

**eFigure 50.** Pooled least-adjusted (random effects) odds ratios of total trans-unsaturated fatty acids and CHD in 6 high-quality retrospective case-control studies.

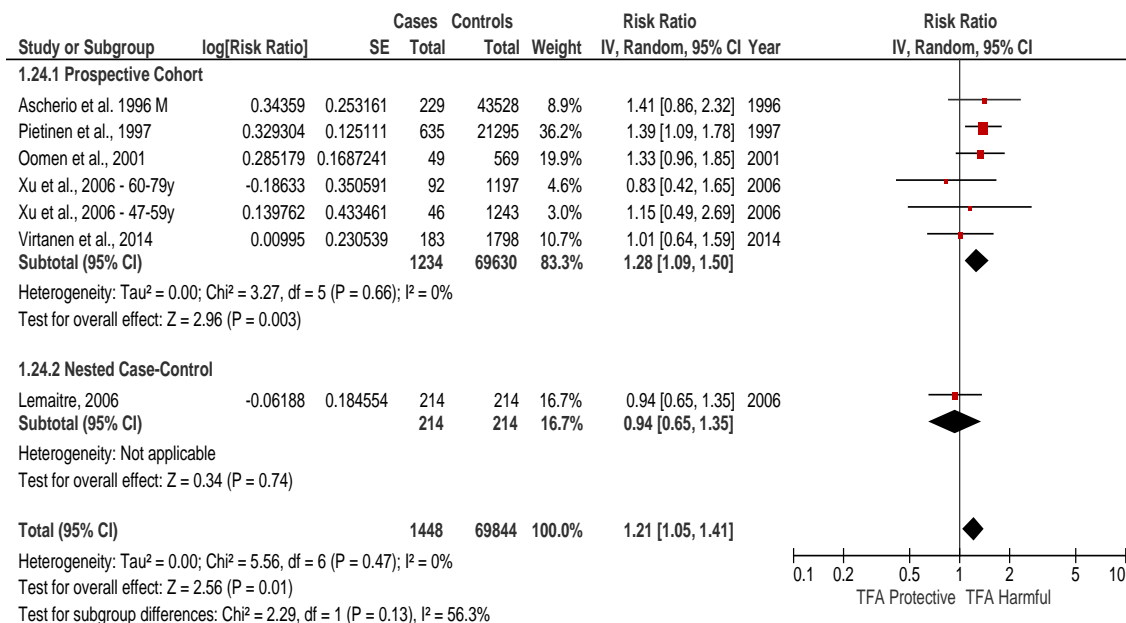

**eFigure 51.** Pooled most-adjusted (random effects) risk ratios of total trans-unsaturated fatty acids and CHD mortality in 4 prospective cohort and 1 nested case-control study.

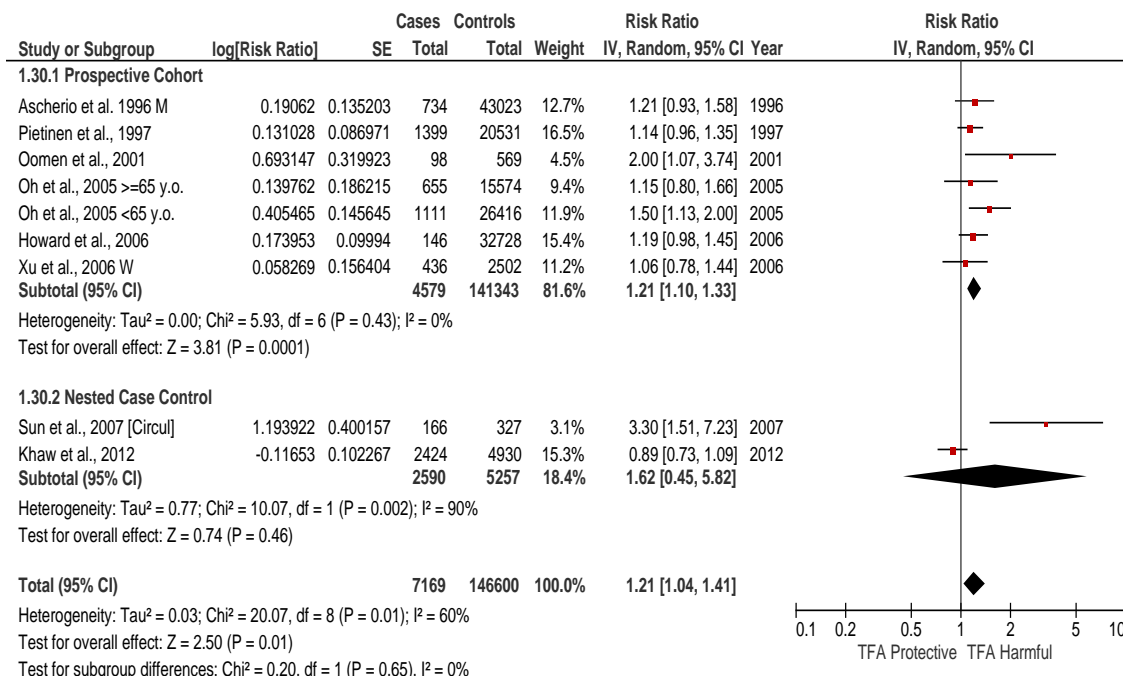

**eFigure 52.** Pooled most-adjusted (random effects) risk ratios of total trans-unsaturated fatty acids and CHD in 6 prospective cohort and 2 nested case-control studies. (M=men; W=women; Circul=citation from journal *Circulation*)

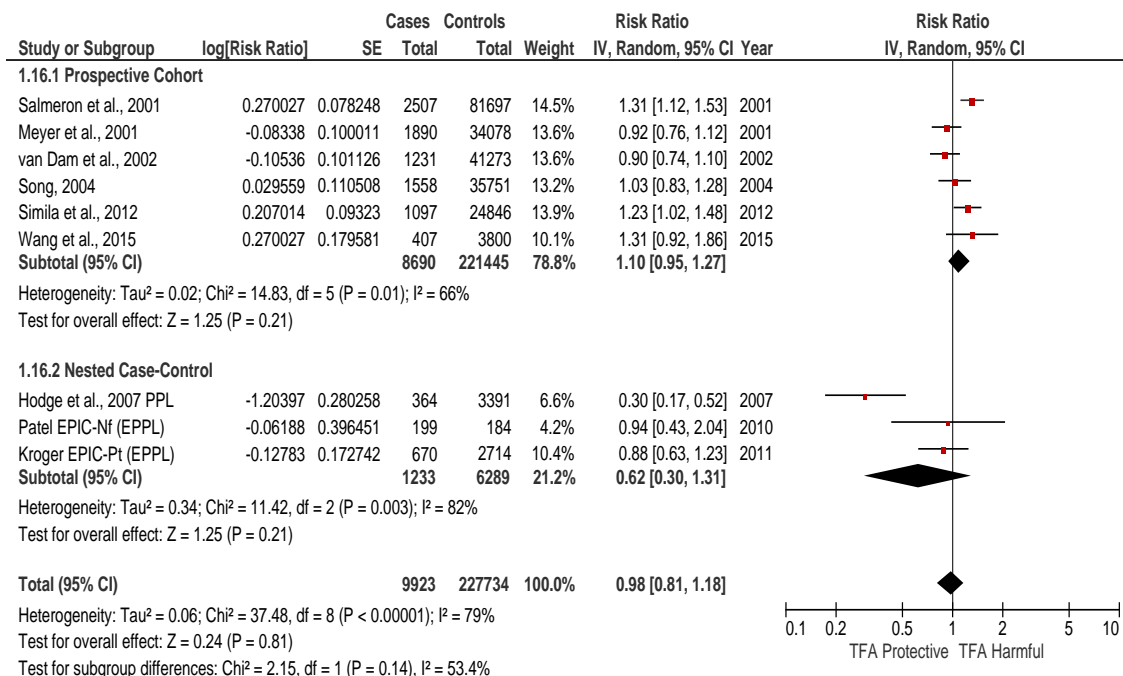

**eFigure 53.** Pooled most-adjusted (random effects) risk ratios of total trans-unsaturated fatty acids and type 2 diabetes in 5 prospective cohort and 3 nested case-control studies. (PPL=phospholipid; EPPL=erythrocyte phospholipid)



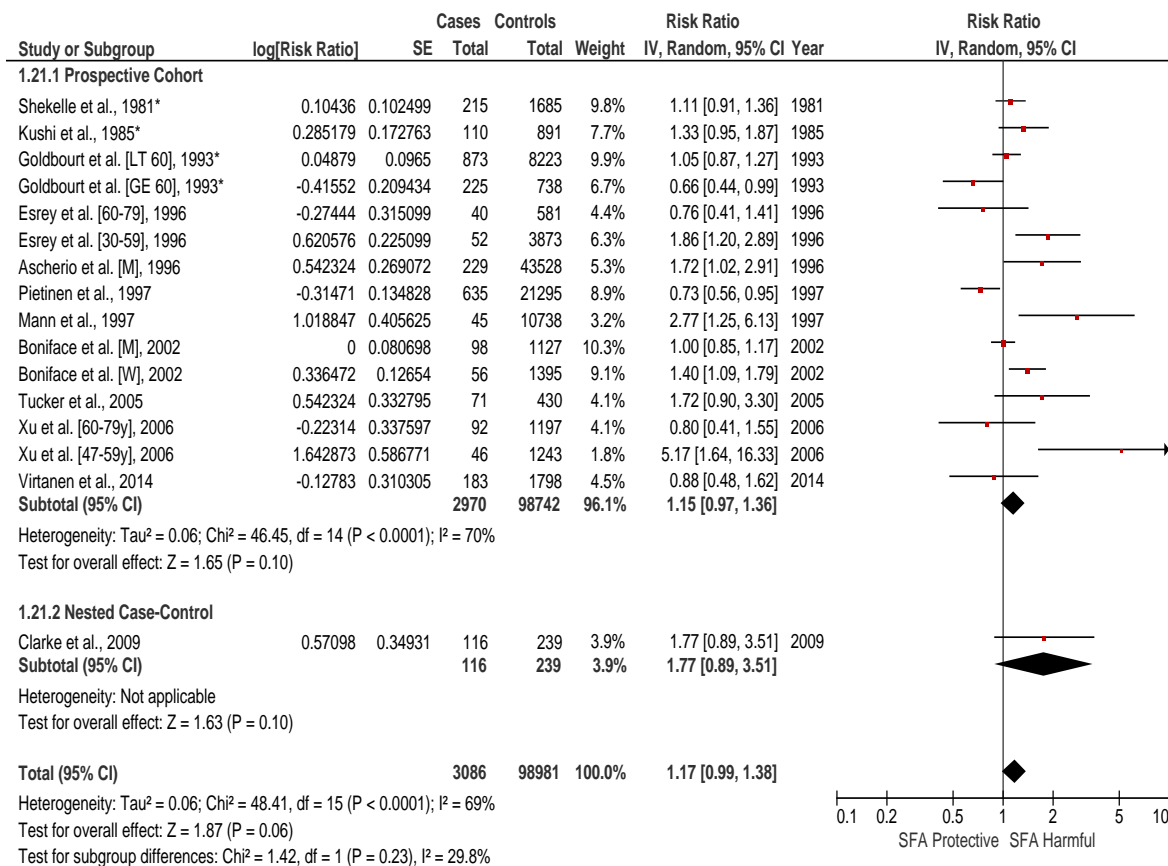

**eFigure 54.** Pooled most-adjusted (random effects) risk ratios of total saturated fatty acids and CHD mortality in 10 prospective cohort and 1 nested case-control study.

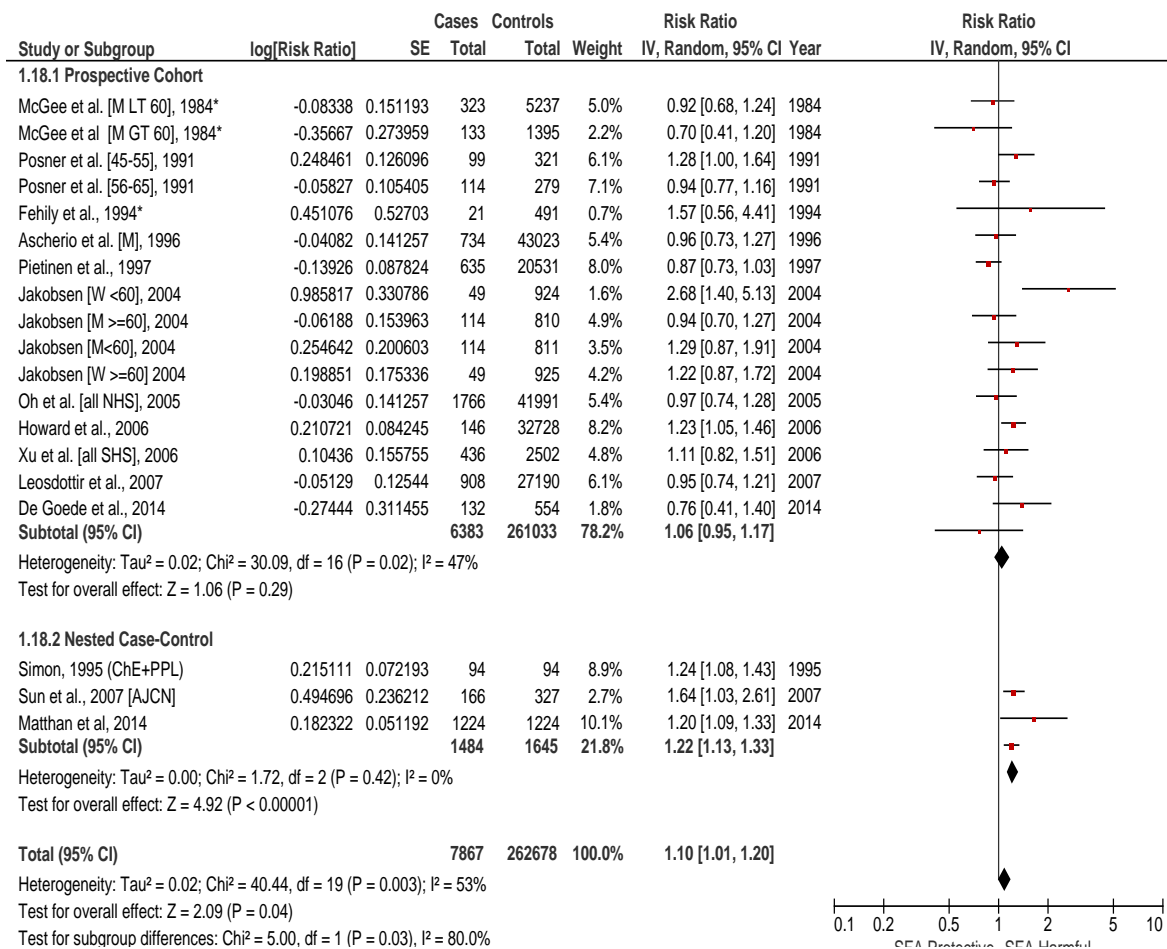

**eFigure 55.** Pooled most-adjusted (random effects) risk ratios of total saturated fatty acids and CHD in 10 prospective cohort and 2 nested case-control studies.

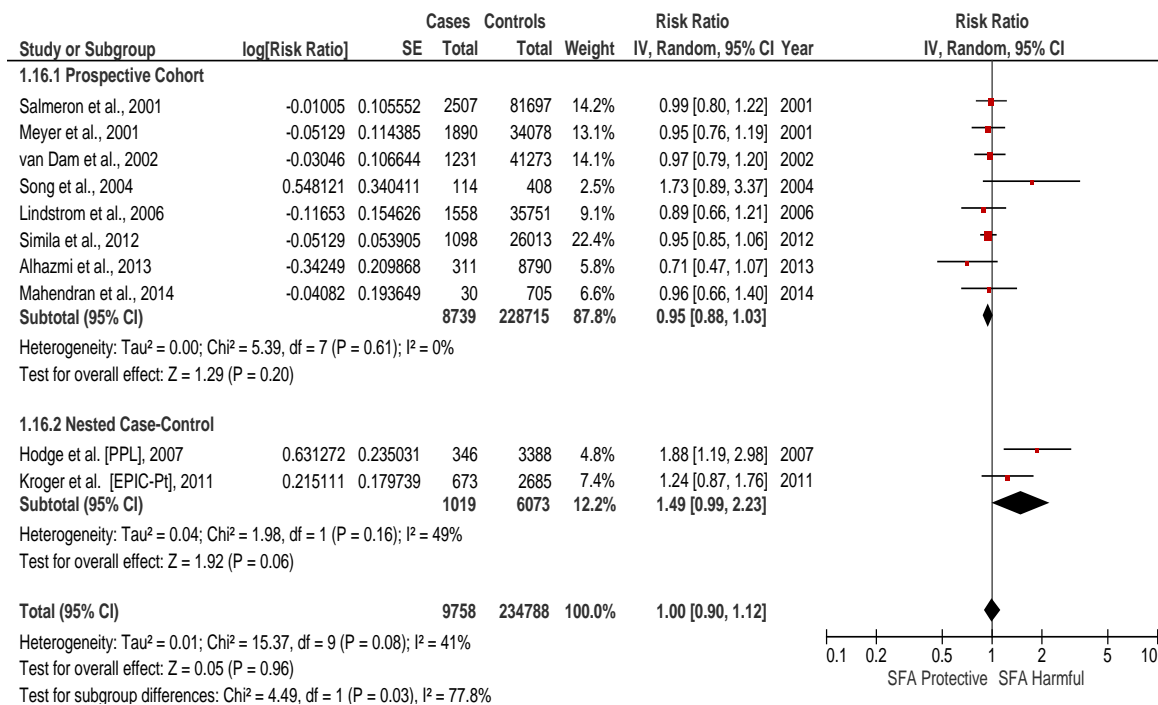

**eFigure 56.** Pooled most-adjusted (random effects) risk ratios of total saturated fatty acids and type 2 diabetes in 6 prospective cohort and 2 nested case-control studies.

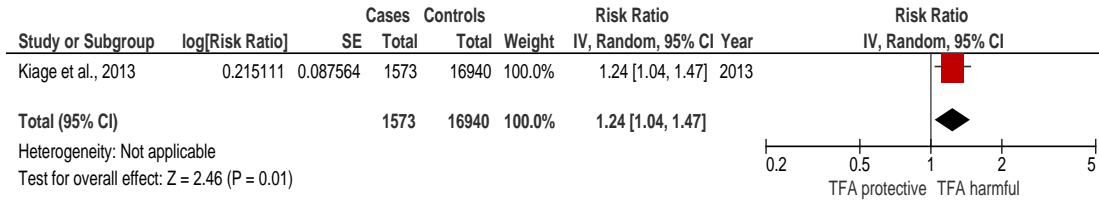

**eFigure 57:** Most-adjusted risk ratio of total trans fatty acids and all-cause mortality in 1 prospective cohort study in which the highest category of *trans* fatty acid intake was  $\geq 1\%$  energy.

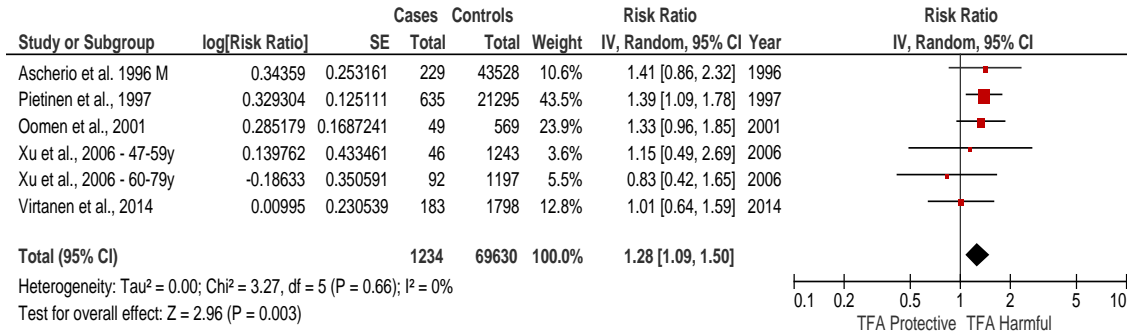

**eFigure 58:** Most-adjusted risk ratio of total trans fatty acids and CHD mortality in 5 prospective cohort studies in which the highest category of *trans* fatty acid intake was  $\geq 1\%$  energy.

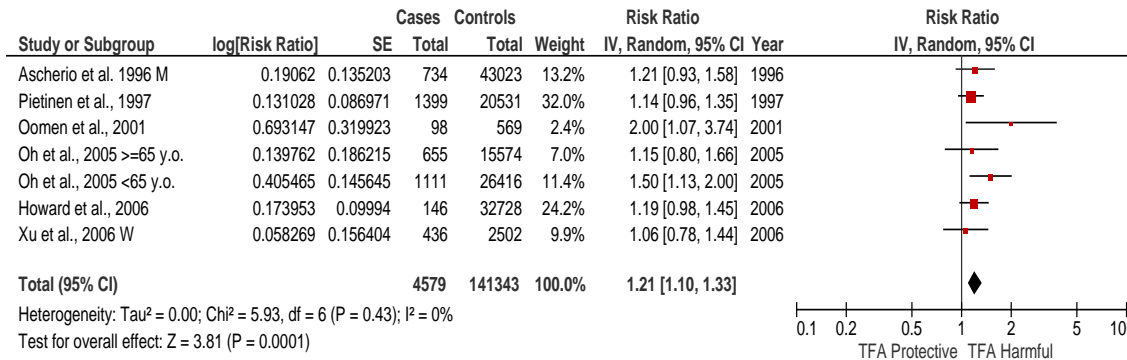

**eFigure 59:** Most-adjusted risk ratio of total trans fatty acids and total CHD in 6 prospective cohort studies in which the highest category of *trans* fatty acid intake was  $\geq 1\%$  energy.

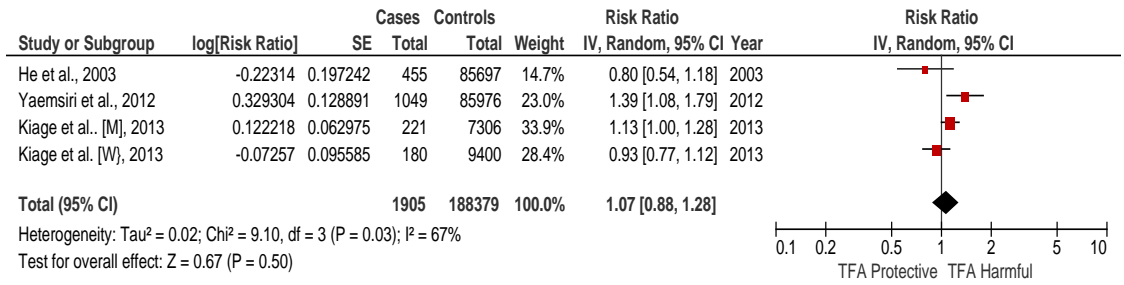

**eFigure 60:** Most-adjusted risk ratio of total trans fatty acids and ischemic stroke in 3 prospective cohort studies in which the highest category of *trans* fatty acid intake was  $\geq 1\%$  energy.

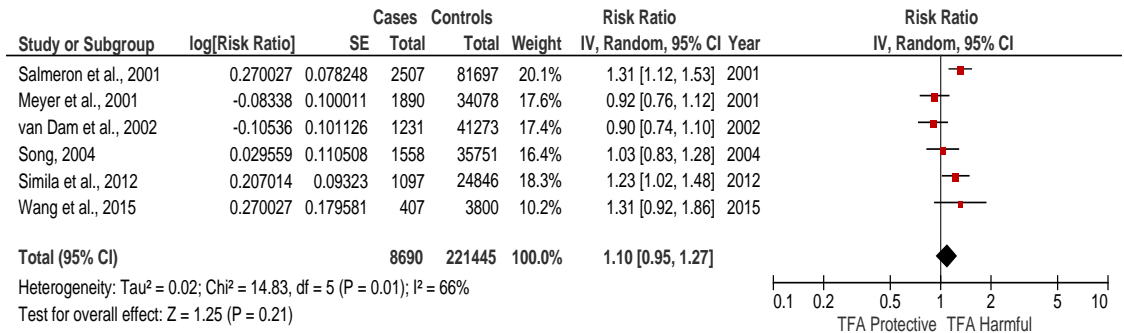

**eFigure 61:** Most-adjusted risk ratio of total trans fatty acids and type 2 diabetes in 6 prospective cohort studies in which the highest category of *trans* fatty acid intake was  $\geq 1\%$  energy.

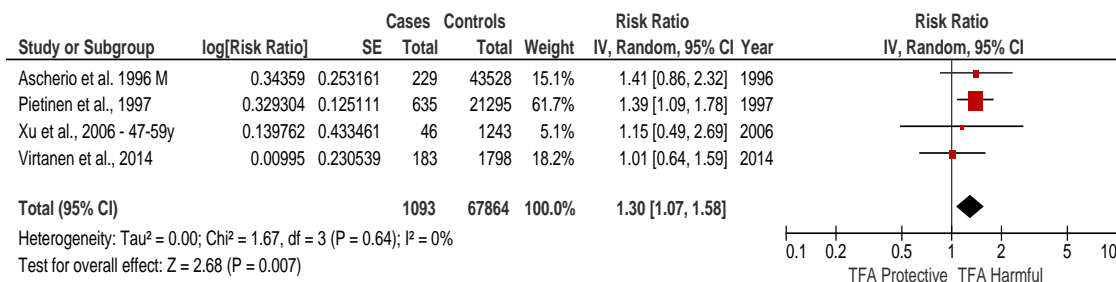

**eFigure 62:** Most-adjusted risk ratio of total trans fatty acids and CHD mortality in 4 prospective cohort studies in which the lowest category of *trans* fatty acid intake was <1% energy.

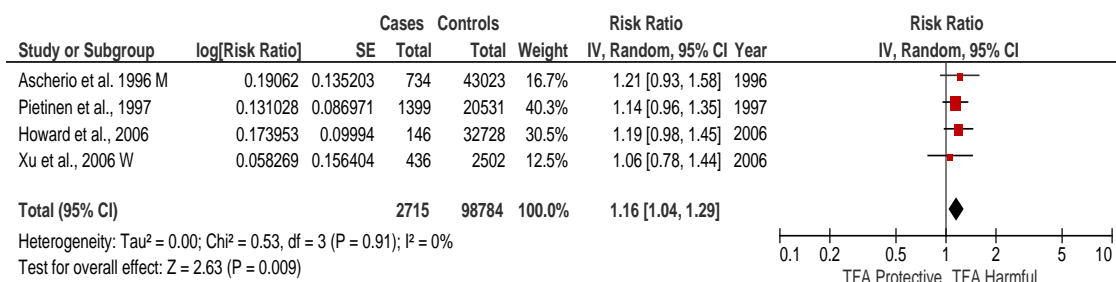

**eFigure 63:** Most-adjusted risk ratio of total trans fatty acids and total CHD in 4 prospective cohort studies in which the lowest category of *trans* fatty acid intake was <1% energy.

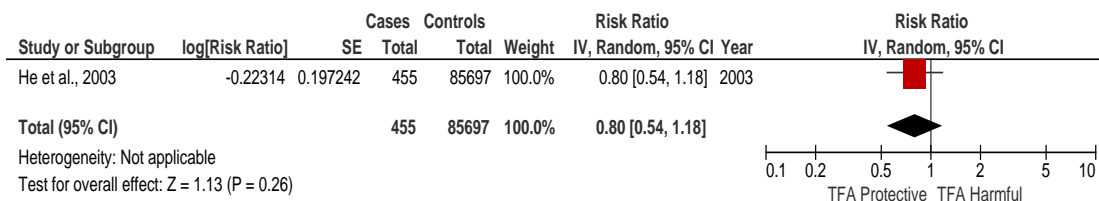

**eFigure 64:** Most-adjusted risk ratio of total trans fatty acids and ischemic stroke in 1 prospective cohort study in which the lowest category of *trans* fatty acid intake was <1% energy.

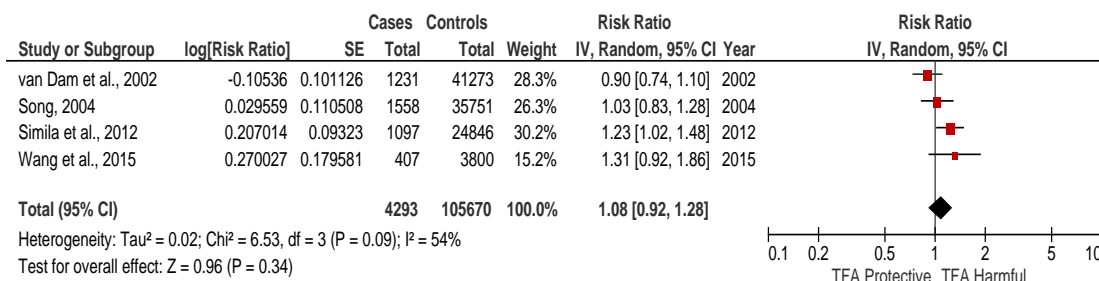

**eFigure 65 :** Most-adjusted risk ratio of total trans fatty acids and type 2 diabetes in 4 prospective cohort studies in which the lowest category of *trans* fatty acid intake was <1% energy.

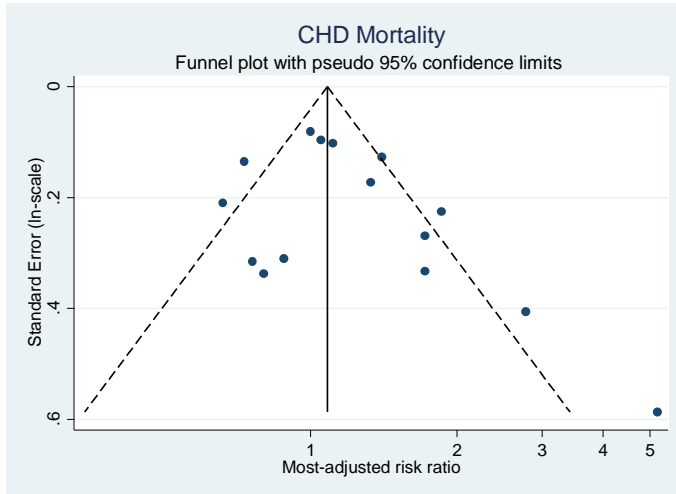

**eFigure 66.** Funnel plot for publication bias (Saturated fat and CHD mortality). Egger’s test of no small-study effects: bias term=1.27; P=0.191. Begg’s test of no small-study effects: Kendall’s score=31 (SD=20.2); P=0.138 (continuity corrected). Trim-and-fill imputed 2 “missed” studies; their inclusion would shift the estimate of association to 1.09 (95% CI: 0.91 to 1.30; P=0.361;  $P_{het}<0.001$ )

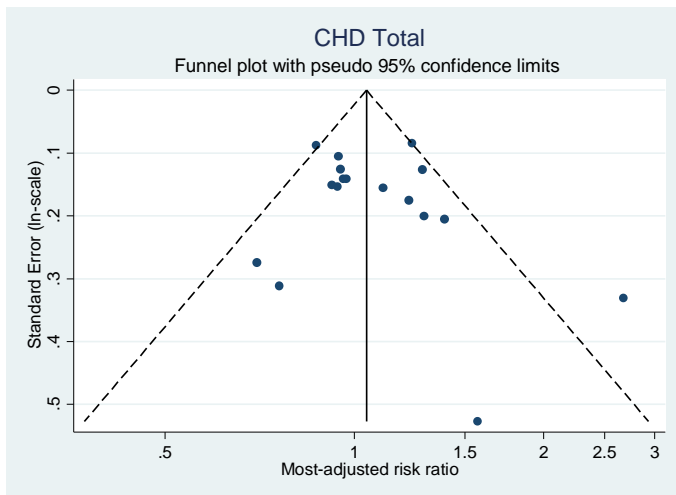

**eFigure 67.** Funnel plot for publication bias (Saturated fat and CHD total). Egger’s test of no small-study effects: bias term=0.75; P=0.394. Begg’s test of no small-study effects: Kendall’s score=27 (SD=24.3); P=0.284 (continuity corrected). Trim-and-fill imputed 2 “missed” studies; their inclusion would shift the estimate of association to 1.03 (95% CI: 0.92 to 1.15; P=0.586;  $P_{het}=0.003$ ).

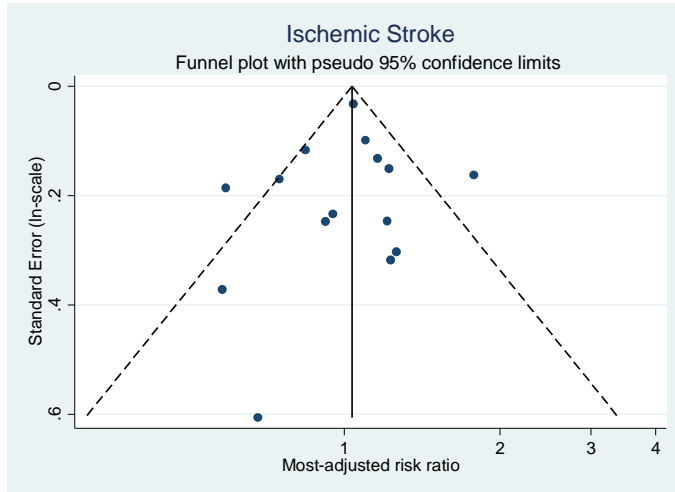

**eFigure 68.** Funnel plot for publication bias (Saturated fat and ischemic stroke). Egger’s test of no small-study effects: bias term=-0.26; P=0.665. Begg’s test of no small-study effects: Kendall’s score=-15 (SD=20.2); P=0.488 (continuity corrected). Trim-and-fill identified no “missed” studies.
