# Supplementary material
Source: PubMed Central journal article supplement (PMC4784800)
Supplement: sour025275.ww5_default.pdf [file sour025275.ww5_default.pdf]

**Appendix 5** GRADE Evidence Profile for prospective cohort studies of saturated-fatty acids and health outcomes [posted as supplied by author]

| Outcome             | Participants (# studies)                           | Risk of bias                          | Inconsistency                          | Indirectness            | Imprecision                         | Publication bias                          | Overall quality of evidence    | Study event rate (%)  | Dose-Response    | Most-adjusted MV RR               | Absolute – adjusted (per 10,000 <sub>1</sub> ) | Least-adjusted MV RR    | Importance |
|---------------------|----------------------------------------------------|---------------------------------------|----------------------------------------|-------------------------|-------------------------------------|-------------------------------------------|--------------------------------|-----------------------|------------------|-----------------------------------|------------------------------------------------|-------------------------|------------|
| All-cause mortality | 99,906 (5 studies; 7 comparisons) <sup>2</sup>     | Serious risk of bias <sup>3</sup>     | No serious inconsistency <sup>4</sup>  | No serious indirectness | No serious imprecision <sup>5</sup> | Not assessed <sup>6</sup>                 | ⊕○○○<br>VERY LOW <sup>7</sup>  | 14,090/99,906 (14.1%) | No <sup>8</sup>  | RR: 0.99 (0.91, 1.09)             | 11 fewer (from 103 fewer to 103 more)          | RR: 0.99 (0.91 to 1.08) | CRITICAL   |
| CHD mortality       | 101,712 (11 studies; 15 comparisons) <sup>9</sup>  | Serious risk of bias <sup>10</sup>    | Serious inconsistency <sup>11</sup>    | No serious indirectness | Serious imprecision <sup>12</sup>   | Possible publication bias <sup>13</sup>   | ⊕○○○<br>VERY LOW <sup>14</sup> | 2,970/101,712 (2.9%)  | No <sup>15</sup> | 1.15 (0.97 to 1.36)               | 3 more (from 6 fewer to 73 more)               | 1.20 (1.02 to 1.41)     | CRITICAL   |
| CHD total           | 267,416 (12 studies; 17 comparisons) <sup>16</sup> | No serious risk of bias <sup>17</sup> | Serious inconsistency <sup>18</sup>    | No serious indirectness | Serious imprecision <sup>19</sup>   | No serious publication bias <sup>20</sup> | ⊕○○○<br>VERY LOW <sup>21</sup> | 6,383/267,416 (2.4%)  | No               | 1.06 (0.95 to 1.17)               | 25 more (from 21 fewer to 72 more)             | 1.12 (1.00 to 1.26)     | CRITICAL   |
| CVD Mortality       | 90,501 (3 studies; 5 comparisons) <sup>22</sup>    | Serious risk of bias <sup>23</sup>    | No serious inconsistency <sup>24</sup> | No serious indirectness | Serious imprecision <sup>25</sup>   | Not assessed <sup>26</sup>                | ⊕○○○<br>VERY LOW <sup>27</sup> | 3,792/90,501 (4.2%)   | No               | 0.97 (0.84 to 1.12)               | 13 fewer (from 67 fewer to 50 more)            | 0.97 (0.84 to 1.12)     | CRITICAL   |
| Ischemic Stroke     | 339,090 (12 studies; 15 comparisons) <sup>28</sup> | Serious risk of bias <sup>29</sup>    | Serious inconsistency <sup>30</sup>    | No serious indirectness | Serious imprecision <sup>31</sup>   | No serious publication bias <sup>32</sup> | ⊕○○○<br>VERY LOW <sup>33</sup> | 6,226/339,090 (1.8%)  | No               | 1.02 (0.90 to 1.15)               | 1 more (from 7 fewer to 11 more)               | 1.03 (0.91 to 1.16)     | CRITICAL   |
| Type 2 diabetes     | 237,454 (8 studies; 8 comparisons) <sup>34</sup>   | No serious risk of bias <sup>35</sup> | No serious inconsistency <sup>36</sup> | No serious indirectness | Serious imprecision <sup>37</sup>   | Not assessed <sup>38</sup>                | ⊕○○○<br>VERY LOW <sup>39</sup> | 8,739/237,454 (3.7%)  | No               | 0.95 (0.88 to 1.03) <sup>40</sup> | 28 fewer (from 67 fewer to 17 more)            | 1.23(0.98 to 1.52)      | CRITICAL   |

Explanatory Notes: <sup>1</sup>Absolute risk was estimated using a procedure called Method of Variance Estimates Recovery (MOVER) proposed by Newcombe et al. (*Evid Based Med* 2014;19:6-8). Estimates of baseline risk and associated 95% confidence levels, were obtained from the Emerging Risk Factors Consortium (*Lancet* 2010 Jun 26;375(9733):2215-22) which included 691,872 people from 102

prospective studies. Overall, the mean age of participants at entry was 52 (SD 13) years, and 297,081 (43%) were women. (96%) were in Europe, North America, and Australasia, with the remainder in Japan or the Caribbean. These risks were 11.4% (11.2% to 11.6%) for total mortality; 2.0% (1.9% to 2.2%) for CHD mortality, 4.2% (4.1% to 4.4%) for total CHD; 0.7% (0.5% to 0.8%) for ischemic stroke; and 5.6% (5.5% to 5.8%) for type 2 diabetes.

<sup>2</sup>The meta-analysis pooled estimate Included data from 5 prospective cohort studies (7 comparisons), with average duration of follow-up ranging from 6.6 to 19.3 y (median=13.3), enrolling participants from 5 different countries (UK, USA, Sweden, Taiwan, and Japan). Also reviewed in the text but not included in the meta-analysis was the Seven Countries Study, which followed 12,763 men from 7 different countries (USA, Finland, Netherlands, Italy, Croatia, Serbia, Greece, and Japan) for 25 years, and observed 5,973 deaths (31.9%)

<sup>3</sup>Possibility of residual confounding always must be considered in observational studies. Newcastle-Ottawa score for 6 studies range from 6 to 8 (median=7). Main study limitations included incomplete adjustment for confounders, and measurement error related to saturated fat intake.

<sup>4</sup>Though not included in the meta-analysis, our review identified the findings of the 7 Countries' study (Kromhout et al.) which supported a continuous dose-response association for reduced SFA: a 5% reduction in %E from saturated fat was associated with 4.7% reduction in total mortality risk; however meta-analysis of 5 prospective cohort studies (7 comparisons) consistent with no effect of increased SFA on mortality ( $I^2=33\%$ ;  $P_{het}=0.17$ ). Not downgraded.

<sup>5</sup>Optimal information size met (n=14,090 events); summary RR crosses 1.0, but bounds of 95% CL >0.8 and <1.2. Not downgraded.

<sup>6</sup>Due to small number of studies (n<10) risk of publication bias not formally assessed.

<sup>7</sup>Data from cohort studies begin with a grade of "LOW". Downgraded for serious risk of bias.

<sup>8</sup>Though not included in the meta-analysis, the 7 Countries' study (Kromhout et al.) found a continuous dose-response association for reduced SFA: a 5% reduction in %E from saturated fat associated with 4.7% reduction in total mortality risk; no dose-response noted by Mann et al., Tucker et al., Chien et al., Wakai et al., or Leosdottir et al.

<sup>9</sup>Included data from 11 prospective cohort studies (15 comparisons), with a duration of follow-up from 6 to 23 y (median=16), enrolling participants from 6 different countries.

<sup>10</sup>Possibility of residual confounding always must be considered in observational studies. Newcastle-Ottawa score for 11 studies ranged from 6 to 9 (median=7). Main study limitations included incomplete adjustment for confounders, high attrition, and uncertain outcome confirmation. Fully-adjusted models yield weaker effects than minimally-adjusted models, suggesting that these variables captured some important confounders.

<sup>11</sup> $I^2=70\%$ ;  $P_{het}<.0001$ ; 9 studies had point estimates >1.0 and 5 had point estimates <1.0; 1 study had point estimate=1.0.

<sup>12</sup>Optimal information size met (n=2,970 events); summary RR crosses 1.0: lower bound of 95% CI >0.8 but upper bound  $\geq 1.36$ , which exceeds the threshold for important harm.

<sup>13</sup>funnel plot asymmetry suggestive of publication bias; Egger's test  $P=0.191$  and Begg's test  $P=0.138$ . Trim-and-fill analysis identified 2 "missed" studies. "Filled" random-effects RR: 1.09 (95% CI: 0.91 to 1.30;  $P=0.361$ ;  $P_{het}<0.001$ ) [eFigure 66]

<sup>14</sup>Data from cohort studies begin with a grade of "LOW". Downgraded for serious risk of bias, serious inconsistency, serious imprecision, and possible publication bias

<sup>15</sup>No evidence of dose-response association in 2 studies which directly measured it (Xu et al., Ascherio et al.; n=367 observed events in 46,335 individuals, combined, followed for 6-7 years).

<sup>16</sup>Included data from 12 prospective cohort studies (17 comparisons), with a duration of follow-up from 1 to 20 y (median=11.1), enrolling participants from 7 different countries.

<sup>17</sup>Possibility of residual confounding always must be considered in observational studies. Newcastle-Ottawa score for 9 assessable studies range from 6 to 9 (median=8). Main study limitations included incomplete adjustment for confounders (most commonly family history), uncertain outcome validation, and use of a single 24-h recall to represent long-term diet. Fully-adjusted models yield weaker effects than minimally-adjusted models, suggesting that these variables captured some important confounders. Not downgraded.

<sup>18</sup> $I^2=47\%$ ;  $P_{het}=.02$ ; 8 studies had point estimates >1.0 and 9 had point estimates <1.0.

- <sup>19</sup>Optimal information size met (n=6,383 events); summary RR crosses 1.0, however both bounds of 95% >0.8 and <1.2.
- <sup>20</sup>Funnel plot revealed no asymmetry; neither test of publication bias approached P<0.10; “filled” random-effects RR: 1.03 (95% CI: 0.92 to 1.15; P=0.586;  $P_{het}$ =0.003). [eFigure 67]
- <sup>21</sup>Data from cohort studies begin with a grade of “LOW”. Downgraded for serious inconsistency.
- <sup>22</sup>Included data from 3 prospective cohort studies (5 comparisons), with a duration of follow-up of 6.6 to 19.3 y (median=14), enrolling participants from Sweden and Japan.
- <sup>23</sup>Possibility of residual confounding always must be considered in observational studies. Newcastle-Ottawa scores for 3 studies ranged from 5 to 8 (median=7). Main limitations related to potential for measurement error of saturated fat; and incomplete adjustment for confounders. Downgraded.
- <sup>24</sup> $I^2$ =19%;  $P_{het}$ =.29; 4 of 5 point estimates <1.0
- <sup>25</sup>Optimal information size met (n=3,792 events); summary RR crosses 1.0, but lower bound of 95% CI = 0.84 and upper bound of 95% CI = 1.12. Not downgraded.
- <sup>26</sup>Due to small number of studies (n<10) risk of publication bias not formally assessed.
- <sup>27</sup>Data from cohort studies begin with a grade of “LOW”. Downgraded for serious risk of bias.
- <sup>28</sup>Included data from 12 prospective cohort studies (15 comparisons), with a duration of follow-up from 7.6 to 32 y (median=14), enrolling participants from 6 different countries.
- <sup>29</sup>Possibility of residual confounding always must be considered in observational studies. Newcastle-Ottawa score for 12 studies ranged from 5 to 8 (median=7). Main study limitations included incomplete adjustment for confounders (most commonly family history, and socioeconomic status), and failure to document losses to follow-up, and unclear outcome validation.
- <sup>30</sup> $I^2$ =59%;  $P_{het}$ =.002; 8 studies had point estimates >1.0 and 7 had point estimates <1.0.
- <sup>31</sup>Optimal information size met (n=6,226 events); summary RR crosses 1.0, however both bounds of 95% >0.8 and <1.2.
- <sup>32</sup>Funnel plot revealed no asymmetry; neither test of publication bias approached P<0.10. Trim-and-fill identified no “missed” studies. [eFigure 68]
- <sup>33</sup>Data from cohort studies begin with a grade of “LOW”. Downgraded for serious risks of bias, serious inconsistency.
- <sup>34</sup>Included data from 8 prospective cohort studies (8 comparisons), with a duration of follow-up from 5 to 14 y (median=9.9), enrolling participants from 3 different countries (USA, Finland, Australia).
- <sup>35</sup>Possibility of residual confounding always must be considered in observational studies. Fully-adjusted models yield weaker effects than minimally-adjusted models, suggesting that these variables captured some important confounders. Newcastle-Ottawa score for 8 studies range from 5 to 9 (median=6.5). Main study limitations included incomplete adjustment for confounders (most commonly family history and socioeconomic status), uncertain outcome validation.
- <sup>36</sup> $I^2$ =0%; P=.61; 1 study had RR >1.0, 7 had RR<1.0.
- <sup>37</sup>Optimal information size met (n=8,739 events); summary RR crosses 1.0, however both bounds of 95% >0.8 and <1.2.
- <sup>38</sup>Due to small number of studies (n<10) risk of publication bias not formally assessed.
- <sup>39</sup>Data from cohort studies begin with a grade of “LOW”. Downgraded for serious imprecision.
- <sup>40</sup>When we pool prospective cohort studies and nested case-control studies (n=2; 1,019 cases; pooled mvRR=1.49; 95% CI: 0.99 to 2.23), the pooled effect is 1.00 (95% CI: 0.90 to 1.12;  $I^2$ =41%  $P_{het}$ =.08)
